# Supplementary material for: Domesticated, Genetically Engineered, and Wild Plant Relatives Exhibit Unintended Phenotypic Differences: A Comparative Meta-Analysis Profiling Rice, Canola, Maize, Sunflower, and Pumpkin
Source: Front Plant Sci. 2017 Dec 5;8:2030. doi: 10.3389/fpls.2017.02030 (PMC5723393; doi:10.3389/fpls.2017.02030)
Supplement: DATA SHEET S1 — Full dataset of values for all the phenotypic traits included in the meta-analysis profiling rice, canola, maize, sunflower, and pumpkin. [file Data_Sheet_1.XLSX]

## Sheet: database
crop	paper_key	citations	id	sp	line	line_type	genotype	gene	gmo_group	condition	seeds_number	unit	pollen_viability	unit	germination	unit	days_flowering	number_flowers	unit	height	unit	number_fruits	unit	complete_reference
rice	1	Chen_2006	1	oryza_sativa	Minghui_63	commercial_line	domNGE	NA	NA	controlled	359	total_number	NA	NA	NA	NA	NA	NA	NA	74.7	cm	NA	NA	Chen, L.-Y., Snow, A. A., Wang, F., & Lu, B. (2006). Effects of insect-resistance transgenes on fecundity in rice (Oryza sativa, POACEA): A test for underlying costs. American Journal of Botany, 93(1), 94–101.
rice	1	Chen_2006	2	oryza_sativa	Minghui_63	commercial_line	domNGE	NA	NA	controlled	534	total_number	NA	NA	NA	NA	NA	NA	NA	151.5	cm	NA	NA	Chen, L.-Y., Snow, A. A., Wang, F., & Lu, B. (2006). Effects of insect-resistance transgenes on fecundity in rice (Oryza sativa, POACEA): A test for underlying costs. American Journal of Botany, 93(1), 94–101.
rice	1	Chen_2006	3	oryza_sativa	NA	NA	domGE	Bt	2	controlled	360	total_number	NA	NA	NA	NA	NA	NA	NA	106.3	cm	NA	NA	Chen, L.-Y., Snow, A. A., Wang, F., & Lu, B. (2006). Effects of insect-resistance transgenes on fecundity in rice (Oryza sativa, POACEA): A test for underlying costs. American Journal of Botany, 93(1), 94–101.
rice	1	Chen_2006	4	oryza_sativa	NA	NA	domGE	CpT1	2	controlled	381	total_number	NA	NA	NA	NA	NA	NA	NA	83.2	cm	NA	NA	Chen, L.-Y., Snow, A. A., Wang, F., & Lu, B. (2006). Effects of insect-resistance transgenes on fecundity in rice (Oryza sativa, POACEA): A test for underlying costs. American Journal of Botany, 93(1), 94–101.
rice	1	Chen_2006	5	oryza_sativa	NA	NA	domGE	Bt/CpT1	2	controlled	412	total_number	NA	NA	NA	NA	NA	NA	NA	84	cm	NA	NA	Chen, L.-Y., Snow, A. A., Wang, F., & Lu, B. (2006). Effects of insect-resistance transgenes on fecundity in rice (Oryza sativa, POACEA): A test for underlying costs. American Journal of Botany, 93(1), 94–101.
rice	1	Chen_2006	6	oryza_sativa	NA	NA	domGE	Bt	2	controlled	550	total_number	NA	NA	NA	NA	NA	NA	NA	147.3	cm	NA	NA	Chen, L.-Y., Snow, A. A., Wang, F., & Lu, B. (2006). Effects of insect-resistance transgenes on fecundity in rice (Oryza sativa, POACEA): A test for underlying costs. American Journal of Botany, 93(1), 94–101.
rice	1	Chen_2006	7	oryza_sativa	NA	NA	domGE	CpT1	2	controlled	570	total_number	NA	NA	NA	NA	NA	NA	NA	142.1	cm	NA	NA	Chen, L.-Y., Snow, A. A., Wang, F., & Lu, B. (2006). Effects of insect-resistance transgenes on fecundity in rice (Oryza sativa, POACEA): A test for underlying costs. American Journal of Botany, 93(1), 94–101.
rice	1	Chen_2006	8	oryza_sativa	NA	NA	domGE	Bt/CpT1	2	controlled	741	total_number	NA	NA	NA	NA	NA	NA	NA	127.5	cm	NA	NA	Chen, L.-Y., Snow, A. A., Wang, F., & Lu, B. (2006). Effects of insect-resistance transgenes on fecundity in rice (Oryza sativa, POACEA): A test for underlying costs. American Journal of Botany, 93(1), 94–101.
rice	2	Chun_2011	9	oryza_sativa	NA	NA	domNGE	NA	NA	controlled	1350	total_number	NA	NA	NA	NA	NA	NA	NA	103.3	cm	NA	NA	Chun, Y. J., Kim, H. J., Park, K. W., Jeong, S. C., Lee, B., Back, K., … Kim, C. G. (2011). Two-year field study shows little evidence that PPO-transgenic rice affects the structure of soil microbial communities. Biology and Fertility of Soils, 48(4). http://doi.org/10.1007/s00374-011-0626-5
rice	2	Chun_2013	10	oryza_sativa	Dongjin	commercial_line	domGE	PPO	1	controlled	1400	total_number	NA	NA	NA	NA	NA	NA	NA	84.9	cm	NA	NA	Chun, Y. J., Kim, D. I., Park, K. W., Jeong, S. C., Park, S., Back, K., & Kim, C. G. (2013). Fitness cost and competitive ability of transgenic herbicide-tolerant rice expressing a protoporphyrinogen oxidase gene. Journal of Ecology and Environment, 36(1), 39–47. http://doi.org/10.5141/ecoenv.2013.005
rice	3	Chun_2013	11	oryza_sativa	NA	NA	domNGE	NA	NA	controlled	180.2	total_number	NA	NA	NA	NA	NA	NA	NA	105.8	cm	NA	NA	Chun, Y. J., Kim, D. I., Park, K. W., Jeong, S. C., Park, S., Back, K., & Kim, C. G. (2013). Fitness cost and competitive ability of transgenic herbicide-tolerant rice expressing a protoporphyrinogen oxidase gene. Journal of Ecology and Environment, 36(1), 39–47. http://doi.org/10.5141/ecoenv.2013.005
rice	3	Chun_2013	12	oryza_sativa	NA	NA	domGE	PPO	1	controlled	220.8	total_number	NA	NA	NA	NA	NA	NA	NA	120.9	cm	NA	NA	Chun, Y. J., Kim, D. I., Park, K. W., Jeong, S. C., Park, S., Back, K., & Kim, C. G. (2013). Fitness cost and competitive ability of transgenic herbicide-tolerant rice expressing a protoporphyrinogen oxidase gene. Journal of Ecology and Environment, 36(1), 39–47. http://doi.org/10.5141/ecoenv.2013.005
rice	4	Langevin_1990	13	oryza_sativa	Labelle	commercial_line	domNGE	NA	NA	controlled	NA	NA	42.6	%	NA	NA	NA	NA	NA	125	cm	NA	NA	Langevin, S. A., Clay, K., & Grace, J. B. (1990). The Incidence and Effects of Hybridization between Cultivated Rice and its Related Weed Red Rice (Oryza sativa L.). Evolution, 44(4), 1000–1008.
rice	4	Langevin_1990	14	oryza_sativa	Labelle	commercial_line	domNGE	NA	NA	controlled	NA	NA	56.1	%	NA	NA	NA	NA	NA	139.34	cm	NA	NA	Langevin, S. A., Clay, K., & Grace, J. B. (1990). The Incidence and Effects of Hybridization between Cultivated Rice and its Related Weed Red Rice (Oryza sativa L.). Evolution, 44(4), 1000–1008.
rice	4	Langevin_1990	15	oryza_sativa	Leah	commercial_line	domNGE	NA	NA	controlled	NA	NA	53.8	%	NA	NA	NA	NA	NA	113.7	cm	NA	NA	Langevin, S. A., Clay, K., & Grace, J. B. (1990). The Incidence and Effects of Hybridization between Cultivated Rice and its Related Weed Red Rice (Oryza sativa L.). Evolution, 44(4), 1000–1008.
rice	4	Langevin_1990	16	oryza_sativa	Leah	commercial_line	domNGE	NA	NA	controlled	NA	NA	NA	NA	NA	NA	NA	NA	NA	83.5	cm	NA	NA	Langevin, S. A., Clay, K., & Grace, J. B. (1990). The Incidence and Effects of Hybridization between Cultivated Rice and its Related Weed Red Rice (Oryza sativa L.). Evolution, 44(4), 1000–1008.
rice	4	Langevin_1990	17	oryza_sativa	Lemont	commercial_line	domNGE	NA	NA	controlled	NA	NA	NA	NA	NA	NA	NA	NA	NA	90.8	cm	NA	NA	Langevin, S. A., Clay, K., & Grace, J. B. (1990). The Incidence and Effects of Hybridization between Cultivated Rice and its Related Weed Red Rice (Oryza sativa L.). Evolution, 44(4), 1000–1008.
rice	4	Langevin_1990	18	oryza_sativa	Lemont	commercial_line	domNGE	NA	NA	controlled	NA	NA	NA	NA	NA	NA	NA	NA	NA	82.2	cm	NA	NA	Langevin, S. A., Clay, K., & Grace, J. B. (1990). The Incidence and Effects of Hybridization between Cultivated Rice and its Related Weed Red Rice (Oryza sativa L.). Evolution, 44(4), 1000–1008.
rice	4	Langevin_1990	19	oryza_sativa	Mars	commercial_line	domNGE	NA	NA	controlled	NA	NA	NA	NA	NA	NA	NA	NA	NA	99.9	cm	NA	NA	Langevin, S. A., Clay, K., & Grace, J. B. (1990). The Incidence and Effects of Hybridization between Cultivated Rice and its Related Weed Red Rice (Oryza sativa L.). Evolution, 44(4), 1000–1008.
rice	4	Langevin_1990	20	oryza_sativa	Mars	commercial_line	domNGE	NA	NA	controlled	NA	NA	NA	NA	NA	NA	NA	NA	NA	86.9	cm	NA	NA	Langevin, S. A., Clay, K., & Grace, J. B. (1990). The Incidence and Effects of Hybridization between Cultivated Rice and its Related Weed Red Rice (Oryza sativa L.). Evolution, 44(4), 1000–1008.
rice	4	Langevin_1990	21	oryza_sativa	Nortai	commercial_line	domNGE	NA	NA	controlled	NA	NA	NA	NA	NA	NA	NA	NA	NA	94.8	cm	NA	NA	Langevin, S. A., Clay, K., & Grace, J. B. (1990). The Incidence and Effects of Hybridization between Cultivated Rice and its Related Weed Red Rice (Oryza sativa L.). Evolution, 44(4), 1000–1008.
rice	4	Langevin_1990	22	oryza_sativa	Nortai	commercial_line	domNGE	NA	NA	controlled	NA	NA	NA	NA	NA	NA	NA	NA	NA	88.3	cm	NA	NA	Langevin, S. A., Clay, K., & Grace, J. B. (1990). The Incidence and Effects of Hybridization between Cultivated Rice and its Related Weed Red Rice (Oryza sativa L.). Evolution, 44(4), 1000–1008.
rice	4	Langevin_1990	23	oryza_sativa	Saturn	commercial_line	domNGE	NA	NA	controlled	NA	NA	NA	NA	NA	NA	NA	NA	NA	89.6	cm	NA	NA	Langevin, S. A., Clay, K., & Grace, J. B. (1990). The Incidence and Effects of Hybridization between Cultivated Rice and its Related Weed Red Rice (Oryza sativa L.). Evolution, 44(4), 1000–1008.
rice	4	Langevin_1990	24	oryza_sativa	Saturn	commercial_line	domNGE	NA	NA	controlled	NA	NA	NA	NA	NA	NA	NA	NA	NA	86.4	cm	NA	NA	Langevin, S. A., Clay, K., & Grace, J. B. (1990). The Incidence and Effects of Hybridization between Cultivated Rice and its Related Weed Red Rice (Oryza sativa L.). Evolution, 44(4), 1000–1008.
rice	4	Langevin_1990	25	oryza_sativa	Labelle	commercial_line	wild	NA	NA	controlled	NA	NA	NA	NA	NA	NA	NA	NA	NA	153.3	cm	NA	NA	Langevin, S. A., Clay, K., & Grace, J. B. (1990). The Incidence and Effects of Hybridization between Cultivated Rice and its Related Weed Red Rice (Oryza sativa L.). Evolution, 44(4), 1000–1008.
rice	4	Langevin_1990	26	oryza_sativa	Leah	commercial_line	wild	NA	NA	controlled	NA	NA	NA	NA	NA	NA	NA	NA	NA	122.9	cm	NA	NA	Langevin, S. A., Clay, K., & Grace, J. B. (1990). The Incidence and Effects of Hybridization between Cultivated Rice and its Related Weed Red Rice (Oryza sativa L.). Evolution, 44(4), 1000–1008.
rice	4	Langevin_1990	27	oryza_sativa	Lemont	commercial_line	wild	NA	NA	controlled	NA	NA	NA	NA	NA	NA	NA	NA	NA	161	cm	NA	NA	Langevin, S. A., Clay, K., & Grace, J. B. (1990). The Incidence and Effects of Hybridization between Cultivated Rice and its Related Weed Red Rice (Oryza sativa L.). Evolution, 44(4), 1000–1008.
rice	4	Langevin_1990	28	oryza_sativa	Mars	commercial_line	wild	NA	NA	controlled	NA	NA	NA	NA	NA	NA	NA	NA	NA	120.15	cm	NA	NA	Langevin, S. A., Clay, K., & Grace, J. B. (1990). The Incidence and Effects of Hybridization between Cultivated Rice and its Related Weed Red Rice (Oryza sativa L.). Evolution, 44(4), 1000–1008.
rice	4	Langevin_1990	29	oryza_sativa	Nortai	commercial_line	wild	NA	NA	controlled	NA	NA	NA	NA	NA	NA	NA	NA	NA	147.4	cm	NA	NA	Langevin, S. A., Clay, K., & Grace, J. B. (1990). The Incidence and Effects of Hybridization between Cultivated Rice and its Related Weed Red Rice (Oryza sativa L.). Evolution, 44(4), 1000–1008.
rice	4	Langevin_1990	30	oryza_sativa	Saturn	commercial_line	wild	NA	NA	controlled	NA	NA	NA	NA	NA	NA	NA	NA	NA	117.1	cm	NA	NA	Langevin, S. A., Clay, K., & Grace, J. B. (1990). The Incidence and Effects of Hybridization between Cultivated Rice and its Related Weed Red Rice (Oryza sativa L.). Evolution, 44(4), 1000–1008.
rice	5	Oard_2000	31	oryza_sativa	Bengal_Red	commercial_line	domNGE	NA	NA	controlled	397.3	total_number	NA	NA	NA	NA	NA	NA	NA	85.1	cm	NA	NA	Oard, J., Alan, M., Linscombe, S., Gealy, D., & Gravois, K. (2000). Field evaluation of seed production, shattering, and dormancy in hybrid populations of transgenic rice (Oryza sativa) and the weed, red rice ( Oryza sativa). Plant Science, 157, 13–22.
rice	5	Oard_2000	32	oryza_sativa	Bengal_Red	commercial_line	domNGE	NA	NA	controlled	444.2	total_number	NA	NA	NA	NA	NA	NA	NA	84.8	cm	NA	NA	Oard, J., Alan, M., Linscombe, S., Gealy, D., & Gravois, K. (2000). Field evaluation of seed production, shattering, and dormancy in hybrid populations of transgenic rice (Oryza sativa) and the weed, red rice ( Oryza sativa). Plant Science, 157, 13–22.
rice	5	Oard_2000	33	oryza_sativa	Cypress_Red	commercial_line	domNGE	NA	NA	controlled	412.2	total_number	NA	NA	NA	NA	NA	NA	NA	109	cm	NA	NA	Oard, J., Alan, M., Linscombe, S., Gealy, D., & Gravois, K. (2000). Field evaluation of seed production, shattering, and dormancy in hybrid populations of transgenic rice (Oryza sativa) and the weed, red rice ( Oryza sativa). Plant Science, 157, 13–22.
rice	5	Oard_2000	34	oryza_sativa	Cypress	commercial_line	domNGE	NA	NA	controlled	601.6	total_number	NA	NA	NA	NA	NA	NA	NA	112.7	cm	NA	NA	Oard, J., Alan, M., Linscombe, S., Gealy, D., & Gravois, K. (2000). Field evaluation of seed production, shattering, and dormancy in hybrid populations of transgenic rice (Oryza sativa) and the weed, red rice ( Oryza sativa). Plant Science, 157, 13–22.
rice	5	Oard_2000	35	oryza_sativa	Bengal	commercial_line	domNGE	NA	NA	controlled	565.6	total_number	NA	NA	NA	NA	NA	NA	NA	136	cm	NA	NA	Oard, J., Alan, M., Linscombe, S., Gealy, D., & Gravois, K. (2000). Field evaluation of seed production, shattering, and dormancy in hybrid populations of transgenic rice (Oryza sativa) and the weed, red rice ( Oryza sativa). Plant Science, 157, 13–22.
rice	5	Oard_2000	36	oryza_sativa	Cypress_CPB6	commercial_line	domGE	bar	1	controlled	449.6	total_number	NA	NA	NA	NA	NA	NA	NA	145.4	cm	NA	NA	Oard, J., Alan, M., Linscombe, S., Gealy, D., & Gravois, K. (2000). Field evaluation of seed production, shattering, and dormancy in hybrid populations of transgenic rice (Oryza sativa) and the weed, red rice ( Oryza sativa). Plant Science, 157, 13–22.
rice	5	Oard_2000	37	oryza_sativa	Cypress_CPB6	commercial_line	domGE	bar	1	controlled	415	total_number	NA	NA	NA	NA	NA	NA	NA	109.2	cm	NA	NA	Oard, J., Alan, M., Linscombe, S., Gealy, D., & Gravois, K. (2000). Field evaluation of seed production, shattering, and dormancy in hybrid populations of transgenic rice (Oryza sativa) and the weed, red rice ( Oryza sativa). Plant Science, 157, 13–22.
rice	5	Oard_2000	38	oryza_sativa	Bengal_HU10	commercial_line	domGE	bar	1	controlled	419.7	total_number	NA	NA	NA	NA	NA	NA	NA	86.8	cm	NA	NA	Oard, J., Alan, M., Linscombe, S., Gealy, D., & Gravois, K. (2000). Field evaluation of seed production, shattering, and dormancy in hybrid populations of transgenic rice (Oryza sativa) and the weed, red rice ( Oryza sativa). Plant Science, 157, 13–22.
rice	5	Oard_2000	39	oryza_sativa	Bengal_HU10	commercial_line	domGE	bar	1	controlled	477.9	total_number	NA	NA	NA	NA	NA	NA	NA	147.9	cm	NA	NA	Oard, J., Alan, M., Linscombe, S., Gealy, D., & Gravois, K. (2000). Field evaluation of seed production, shattering, and dormancy in hybrid populations of transgenic rice (Oryza sativa) and the weed, red rice ( Oryza sativa). Plant Science, 157, 13–22.
rice	5	Oard_2000	40	oryza_sativa	Bengal	commercial_line	domGE	bar	1	controlled	584	total_number	NA	NA	NA	NA	NA	NA	NA	151.2	cm	NA	NA	Oard, J., Alan, M., Linscombe, S., Gealy, D., & Gravois, K. (2000). Field evaluation of seed production, shattering, and dormancy in hybrid populations of transgenic rice (Oryza sativa) and the weed, red rice ( Oryza sativa). Plant Science, 157, 13–22.
rice	5	Oard_2000	41	oryza_sativa	Cypress_Red	commercial_line	domGE	bar	1	controlled	460.1	total_number	NA	NA	NA	NA	NA	NA	NA	123.6	cm	NA	NA	Oard, J., Alan, M., Linscombe, S., Gealy, D., & Gravois, K. (2000). Field evaluation of seed production, shattering, and dormancy in hybrid populations of transgenic rice (Oryza sativa) and the weed, red rice ( Oryza sativa). Plant Science, 157, 13–22.
rice	5	Oard_2000	42	oryza_sativa	Cypress	commercial_line	domGE	bar	1	controlled	408.3	total_number	NA	NA	NA	NA	NA	NA	NA	113.3	cm	NA	NA	Oard, J., Alan, M., Linscombe, S., Gealy, D., & Gravois, K. (2000). Field evaluation of seed production, shattering, and dormancy in hybrid populations of transgenic rice (Oryza sativa) and the weed, red rice ( Oryza sativa). Plant Science, 157, 13–22.
rice	5	Oard_2000	43	oryza_sativa	Bengal	commercial_line	domGE	bar	1	controlled	542.2	total_number	NA	NA	NA	NA	NA	NA	NA	140.5	cm	NA	NA	Oard, J., Alan, M., Linscombe, S., Gealy, D., & Gravois, K. (2000). Field evaluation of seed production, shattering, and dormancy in hybrid populations of transgenic rice (Oryza sativa) and the weed, red rice ( Oryza sativa). Plant Science, 157, 13–22.
rice	5	Oard_2000	44	oryza_sativa	Bengal_HU11	commercial_line	domGE	bar	1	controlled	482.4	total_number	NA	NA	NA	NA	NA	NA	NA	121.3	cm	NA	NA	Oard, J., Alan, M., Linscombe, S., Gealy, D., & Gravois, K. (2000). Field evaluation of seed production, shattering, and dormancy in hybrid populations of transgenic rice (Oryza sativa) and the weed, red rice ( Oryza sativa). Plant Science, 157, 13–22.
rice	5	Oard_2000	45	oryza_sativa	NA	NA	wild	NA	NA	controlled	264.4	total_number	NA	NA	NA	NA	NA	NA	NA	121.1	cm	NA	NA	Oard, J., Alan, M., Linscombe, S., Gealy, D., & Gravois, K. (2000). Field evaluation of seed production, shattering, and dormancy in hybrid populations of transgenic rice (Oryza sativa) and the weed, red rice ( Oryza sativa). Plant Science, 157, 13–22.
rice	5	Oard_2000	46	oryza_sativa	NA	NA	wild	NA	NA	controlled	490.6	total_number	NA	NA	NA	NA	NA	NA	NA	136.1	cm	NA	NA	Oard, J., Alan, M., Linscombe, S., Gealy, D., & Gravois, K. (2000). Field evaluation of seed production, shattering, and dormancy in hybrid populations of transgenic rice (Oryza sativa) and the weed, red rice ( Oryza sativa). Plant Science, 157, 13–22.
rice	6	Cao_2009	47	oryza_sativa	Minghui_63	commercial_line	domGE	Bt/CpT1	1_2	controlled	1000	total_number	NA	NA	NA	NA	NA	NA	NA	130.7	cm	NA	NA	Cao, Q. J., Xia, H., Yang, X., & Lu, B. R. (2009). Performance of hybrids between weedy rice and insect-resistant transgenic rice under field experiments: Implication for environmental biosafety assessment. Journal of Integrative Plant Biology, 51(12), 1138–1148. http://doi.org/10.1111/j.1744-7909.2009.00877.x
rice	6	Cao_2009	48	oryza_sativa	NA	NA	wild	NA	NA	controlled	1750	total_number	84.9	%	NA	NA	NA	NA	NA	NA	NA	NA	NA	Cao, Q. J., Xia, H., Yang, X., & Lu, B. R. (2009). Performance of hybrids between weedy rice and insect-resistant transgenic rice under field experiments: Implication for environmental biosafety assessment. Journal of Integrative Plant Biology, 51(12), 1138–1148. http://doi.org/10.1111/j.1744-7909.2009.00877.x
rice	6	Cao_2009	49	oryza_sativa	NA	NA	wild	NA	NA	controlled	700	total_number	NA	NA	NA	NA	NA	NA	NA	137.3	cm	NA	NA	Cao, Q. J., Xia, H., Yang, X., & Lu, B. R. (2009). Performance of hybrids between weedy rice and insect-resistant transgenic rice under field experiments: Implication for environmental biosafety assessment. Journal of Integrative Plant Biology, 51(12), 1138–1148. http://doi.org/10.1111/j.1744-7909.2009.00877.x
rice	6	Cao_2009	50	oryza_sativa	NA	NA	wild	NA	NA	controlled	2100	total_number	86.1	%	47.1	%	87	NA	NA	128	cm	NA	NA	Cao, Q. J., Xia, H., Yang, X., & Lu, B. R. (2009). Performance of hybrids between weedy rice and insect-resistant transgenic rice under field experiments: Implication for environmental biosafety assessment. Journal of Integrative Plant Biology, 51(12), 1138–1148. http://doi.org/10.1111/j.1744-7909.2009.00877.x
rice	6	Cao_2009	51	oryza_sativa	NA	NA	wild	NA	NA	controlled	900	total_number	NA	NA	NA	NA	NA	NA	NA	102.1	cm	NA	NA	Cao, Q. J., Xia, H., Yang, X., & Lu, B. R. (2009). Performance of hybrids between weedy rice and insect-resistant transgenic rice under field experiments: Implication for environmental biosafety assessment. Journal of Integrative Plant Biology, 51(12), 1138–1148. http://doi.org/10.1111/j.1744-7909.2009.00877.x
rice	6	Cao_2009	52	oryza_sativa	NA	NA	wild	NA	NA	controlled	2400	total_number	45.2	%	NA	NA	NA	NA	NA	121	cm	NA	NA	Cao, Q. J., Xia, H., Yang, X., & Lu, B. R. (2009). Performance of hybrids between weedy rice and insect-resistant transgenic rice under field experiments: Implication for environmental biosafety assessment. Journal of Integrative Plant Biology, 51(12), 1138–1148. http://doi.org/10.1111/j.1744-7909.2009.00877.x
rice	6	Cao_2009	53	oryza_sativa	NA	NA	wild	NA	NA	controlled	1000	total_number	NA	NA	NA	NA	NA	NA	NA	100.6	cm	NA	NA	Cao, Q. J., Xia, H., Yang, X., & Lu, B. R. (2009). Performance of hybrids between weedy rice and insect-resistant transgenic rice under field experiments: Implication for environmental biosafety assessment. Journal of Integrative Plant Biology, 51(12), 1138–1148. http://doi.org/10.1111/j.1744-7909.2009.00877.x
rice	7	Shivrain_2009	54	oryza_sativa	Chi_4	commercial_line	domNGE	NA	NA	controlled	79	total_number	NA	NA	NA	NA	NA	NA	NA	106.29	cm	NA	NA	Shivrain, V. K., Burgos, N. R., Gealy, D. R., Sales, M. A., & Smith, K. L. (2009). Gene flow from weedy red rice (Oryza sativa L.) to cultivated rice and fitness of hybrids. Pest Management Science, 65(10), 1124–1129. http://doi.org/10.1002/ps.1823
rice	7	Shivrain_2009	55	oryza_sativa	Chi_5	commercial_line	domNGE	NA	NA	controlled	85	total_number	NA	NA	NA	NA	100.5	NA	NA	138	cm	NA	NA	Shivrain, V. K., Burgos, N. R., Gealy, D. R., Sales, M. A., & Smith, K. L. (2009). Gene flow from weedy red rice (Oryza sativa L.) to cultivated rice and fitness of hybrids. Pest Management Science, 65(10), 1124–1129. http://doi.org/10.1002/ps.1823
rice	7	Shivrain_2009	56	oryza_sativa	Cla_3	commercial_line	domNGE	NA	NA	controlled	74	total_number	NA	NA	NA	NA	NA	NA	NA	NA	NA	NA	NA	Shivrain, V. K., Burgos, N. R., Gealy, D. R., Sales, M. A., & Smith, K. L. (2009). Gene flow from weedy red rice (Oryza sativa L.) to cultivated rice and fitness of hybrids. Pest Management Science, 65(10), 1124–1129. http://doi.org/10.1002/ps.1823
rice	7	Shivrain_2009	57	oryza_sativa	Gre_5	commercial_line	domNGE	NA	NA	controlled	69	total_number	NA	NA	NA	NA	NA	NA	NA	NA	NA	NA	NA	Shivrain, V. K., Burgos, N. R., Gealy, D. R., Sales, M. A., & Smith, K. L. (2009). Gene flow from weedy red rice (Oryza sativa L.) to cultivated rice and fitness of hybrids. Pest Management Science, 65(10), 1124–1129. http://doi.org/10.1002/ps.1823
rice	7	Shivrain_2009	58	oryza_sativa	Lon_1	commercial_line	domNGE	NA	NA	controlled	78	total_number	NA	NA	NA	NA	NA	NA	NA	144.49	cm	NA	NA	Shivrain, V. K., Burgos, N. R., Gealy, D. R., Sales, M. A., & Smith, K. L. (2009). Gene flow from weedy red rice (Oryza sativa L.) to cultivated rice and fitness of hybrids. Pest Management Science, 65(10), 1124–1129. http://doi.org/10.1002/ps.1823
rice	7	Shivrain_2009	59	oryza_sativa	Phi_1	commercial_line	domNGE	NA	NA	controlled	85	total_number	NA	NA	NA	NA	91.8	NA	NA	120.1	cm	NA	NA	Shivrain, V. K., Burgos, N. R., Gealy, D. R., Sales, M. A., & Smith, K. L. (2009). Gene flow from weedy red rice (Oryza sativa L.) to cultivated rice and fitness of hybrids. Pest Management Science, 65(10), 1124–1129. http://doi.org/10.1002/ps.1823
rice	7	Shivrain_2009	60	oryza_sativa	Pop_1	commercial_line	domNGE	NA	NA	controlled	76	total_number	NA	NA	NA	NA	NA	NA	NA	123.41	cm	NA	NA	Shivrain, V. K., Burgos, N. R., Gealy, D. R., Sales, M. A., & Smith, K. L. (2009). Gene flow from weedy red rice (Oryza sativa L.) to cultivated rice and fitness of hybrids. Pest Management Science, 65(10), 1124–1129. http://doi.org/10.1002/ps.1823
rice	7	Shivrain_2009	61	oryza_sativa	Ash_1	commercial_line	domNGE	NA	NA	controlled	74	total_number	NA	NA	NA	NA	NA	NA	NA	111.9	cm	NA	NA	Shivrain, V. K., Burgos, N. R., Gealy, D. R., Sales, M. A., & Smith, K. L. (2009). Gene flow from weedy red rice (Oryza sativa L.) to cultivated rice and fitness of hybrids. Pest Management Science, 65(10), 1124–1129. http://doi.org/10.1002/ps.1823
rice	7	Shivrain_2009	62	oryza_sativa	Poi_1	commercial_line	domNGE	NA	NA	controlled	65	total_number	NA	NA	NA	NA	NA	NA	NA	NA	NA	NA	NA	Shivrain, V. K., Burgos, N. R., Gealy, D. R., Sales, M. A., & Smith, K. L. (2009). Gene flow from weedy red rice (Oryza sativa L.) to cultivated rice and fitness of hybrids. Pest Management Science, 65(10), 1124–1129. http://doi.org/10.1002/ps.1823
rice	7	Shivrain_2009	63	oryza_sativa	Poi_4	commercial_line	domNGE	NA	NA	controlled	40	total_number	NA	NA	NA	NA	NA	NA	NA	NA	NA	NA	NA	Shivrain, V. K., Burgos, N. R., Gealy, D. R., Sales, M. A., & Smith, K. L. (2009). Gene flow from weedy red rice (Oryza sativa L.) to cultivated rice and fitness of hybrids. Pest Management Science, 65(10), 1124–1129. http://doi.org/10.1002/ps.1823
rice	7	Shivrain_2009	64	oryza_sativa	Dre_2	commercial_line	domNGE	NA	NA	controlled	81	total_number	NA	NA	NA	NA	105.9	NA	NA	106.7	cm	NA	NA	Shivrain, V. K., Burgos, N. R., Gealy, D. R., Sales, M. A., & Smith, K. L. (2009). Gene flow from weedy red rice (Oryza sativa L.) to cultivated rice and fitness of hybrids. Pest Management Science, 65(10), 1124–1129. http://doi.org/10.1002/ps.1823
rice	7	Shivrain_2009	65	oryza_sativa	Ran_5	commercial_line	domNGE	NA	NA	controlled	65	total_number	NA	NA	NA	NA	NA	NA	NA	NA	NA	NA	NA	Shivrain, V. K., Burgos, N. R., Gealy, D. R., Sales, M. A., & Smith, K. L. (2009). Gene flow from weedy red rice (Oryza sativa L.) to cultivated rice and fitness of hybrids. Pest Management Science, 65(10), 1124–1129. http://doi.org/10.1002/ps.1823
rice	7	Shivrain_2009	66	oryza_sativa	Chi_4/Imi-R	commercial_line	domGE	IMI	1	controlled	73	total_number	NA	NA	NA	NA	NA	NA	NA	NA	NA	NA	NA	Shivrain, V. K., Burgos, N. R., Gealy, D. R., Sales, M. A., & Smith, K. L. (2009). Gene flow from weedy red rice (Oryza sativa L.) to cultivated rice and fitness of hybrids. Pest Management Science, 65(10), 1124–1129. http://doi.org/10.1002/ps.1823
rice	7	Shivrain_2009	67	oryza_sativa	Chi_5/Imi-R	commercial_line	domGE	IMI	1	controlled	71	total_number	NA	NA	NA	NA	NA	NA	NA	NA	NA	NA	NA	Shivrain, V. K., Burgos, N. R., Gealy, D. R., Sales, M. A., & Smith, K. L. (2009). Gene flow from weedy red rice (Oryza sativa L.) to cultivated rice and fitness of hybrids. Pest Management Science, 65(10), 1124–1129. http://doi.org/10.1002/ps.1823
rice	7	Shivrain_2009	68	oryza_sativa	Cla_3/Imi-R	commercial_line	domGE	IMI	1	controlled	75	total_number	NA	NA	NA	NA	NA	NA	NA	76.06	cm	NA	NA	Shivrain, V. K., Burgos, N. R., Gealy, D. R., Sales, M. A., & Smith, K. L. (2009). Gene flow from weedy red rice (Oryza sativa L.) to cultivated rice and fitness of hybrids. Pest Management Science, 65(10), 1124–1129. http://doi.org/10.1002/ps.1823
rice	7	Shivrain_2009	69	oryza_sativa	Gre_5/Imi_R	commercial_line	domGE	IMI	1	controlled	85	total_number	NA	NA	NA	NA	NA	NA	NA	63.3	cm	NA	NA	Shivrain, V. K., Burgos, N. R., Gealy, D. R., Sales, M. A., & Smith, K. L. (2009). Gene flow from weedy red rice (Oryza sativa L.) to cultivated rice and fitness of hybrids. Pest Management Science, 65(10), 1124–1129. http://doi.org/10.1002/ps.1823
rice	7	Shivrain_2009	70	oryza_sativa	Lon_1/Imi_R	commercial_line	domGE	IMI	1	controlled	74	total_number	NA	NA	NA	NA	NA	NA	NA	112.3	cm	NA	NA	Shivrain, V. K., Burgos, N. R., Gealy, D. R., Sales, M. A., & Smith, K. L. (2009). Gene flow from weedy red rice (Oryza sativa L.) to cultivated rice and fitness of hybrids. Pest Management Science, 65(10), 1124–1129. http://doi.org/10.1002/ps.1823
rice	7	Shivrain_2009	71	oryza_sativa	Phi_1/Imi_R	commercial_line	domGE	IMI	1	controlled	82	total_number	NA	NA	NA	NA	151.5	NA	NA	64.27	cm	NA	NA	Shivrain, V. K., Burgos, N. R., Gealy, D. R., Sales, M. A., & Smith, K. L. (2009). Gene flow from weedy red rice (Oryza sativa L.) to cultivated rice and fitness of hybrids. Pest Management Science, 65(10), 1124–1129. http://doi.org/10.1002/ps.1823
rice	7	Shivrain_2009	72	oryza_sativa	Pop_1/Imi_R	commercial_line	domGE	IMI	1	controlled	74	total_number	NA	NA	NA	NA	NA	NA	NA	91.9	cm	NA	NA	Shivrain, V. K., Burgos, N. R., Gealy, D. R., Sales, M. A., & Smith, K. L. (2009). Gene flow from weedy red rice (Oryza sativa L.) to cultivated rice and fitness of hybrids. Pest Management Science, 65(10), 1124–1129. http://doi.org/10.1002/ps.1823
rice	7	Shivrain_2009	73	oryza_sativa	Ash_1/Imi_R	commercial_line	domGE	IMI	1	controlled	69	total_number	NA	NA	NA	NA	NA	NA	NA	NA	NA	NA	NA	Shivrain, V. K., Burgos, N. R., Gealy, D. R., Sales, M. A., & Smith, K. L. (2009). Gene flow from weedy red rice (Oryza sativa L.) to cultivated rice and fitness of hybrids. Pest Management Science, 65(10), 1124–1129. http://doi.org/10.1002/ps.1823
rice	7	Shivrain_2009	74	oryza_sativa	Poi_1/Imi_R	commercial_line	domGE	IMI	1	controlled	81	total_number	NA	NA	NA	NA	154.2	NA	NA	150	cm	NA	NA	Shivrain, V. K., Burgos, N. R., Gealy, D. R., Sales, M. A., & Smith, K. L. (2009). Gene flow from weedy red rice (Oryza sativa L.) to cultivated rice and fitness of hybrids. Pest Management Science, 65(10), 1124–1129. http://doi.org/10.1002/ps.1823
rice	7	Shivrain_2009	75	oryza_sativa	Poi_4/Imi_R	commercial_line	domGE	IMI	1	controlled	78	total_number	NA	NA	NA	NA	NA	NA	NA	88.41	cm	NA	NA	Shivrain, V. K., Burgos, N. R., Gealy, D. R., Sales, M. A., & Smith, K. L. (2009). Gene flow from weedy red rice (Oryza sativa L.) to cultivated rice and fitness of hybrids. Pest Management Science, 65(10), 1124–1129. http://doi.org/10.1002/ps.1823
rice	7	Shivrain_2009	76	oryza_sativa	Dre_2/Imi_R	commercial_line	domGE	IMI	1	controlled	68	total_number	NA	NA	NA	NA	NA	NA	NA	NA	NA	NA	NA	Shivrain, V. K., Burgos, N. R., Gealy, D. R., Sales, M. A., & Smith, K. L. (2009). Gene flow from weedy red rice (Oryza sativa L.) to cultivated rice and fitness of hybrids. Pest Management Science, 65(10), 1124–1129. http://doi.org/10.1002/ps.1823
rice	7	Shivrain_2009	77	oryza_sativa	Ran_5/Imi_R	commercial_line	domGE	IMI	1	controlled	72	total_number	NA	NA	NA	NA	NA	NA	NA	NA	NA	NA	NA	Shivrain, V. K., Burgos, N. R., Gealy, D. R., Sales, M. A., & Smith, K. L. (2009). Gene flow from weedy red rice (Oryza sativa L.) to cultivated rice and fitness of hybrids. Pest Management Science, 65(10), 1124–1129. http://doi.org/10.1002/ps.1823
rice	7	Shivrain_2009	78	oryza_sativa	Imi-R	commercial_line	domGE	IMI	1	controlled	57	total_number	NA	NA	NA	NA	NA	NA	NA	NA	NA	NA	NA	Shivrain, V. K., Burgos, N. R., Gealy, D. R., Sales, M. A., & Smith, K. L. (2009). Gene flow from weedy red rice (Oryza sativa L.) to cultivated rice and fitness of hybrids. Pest Management Science, 65(10), 1124–1129. http://doi.org/10.1002/ps.1823
rice	8	Song_2004	79	oryza_sativa	Minghui_63	commercial_line	domNGE	NA	NA	controlled	NA	NA	NA	NA	NA	NA	NA	NA	NA	153.1	cm	NA	NA	Song, Z. P., Lu, B. R., Wang, B., & Chen, J. K. (2004). Fitness Estimation through Performance Comparison of F 1 Hybrids with their Parental Species Oryza rufipogon and O . sativa. Annals of Botany, 93, 311–316. http://doi.org/10.1093/aob/mch037
rice	8	Song_2004	80	oryza_spp	NA	NA	domNGE	NA	NA	controlled	NA	NA	NA	NA	NA	NA	NA	NA	NA	143.6	cm	NA	NA	Song, Z. P., Lu, B. R., Wang, B., & Chen, J. K. (2004). Fitness Estimation through Performance Comparison of F 1 Hybrids with their Parental Species Oryza rufipogon and O . sativa. Annals of Botany, 93, 311–316. http://doi.org/10.1093/aob/mch037
rice	8	Song_2004	81	oryza_rufipogon	NA	NA	wild	NA	NA	controlled	NA	NA	NA	NA	NA	NA	NA	NA	NA	159.5	cm	NA	NA	Song, Z. P., Lu, B. R., Wang, B., & Chen, J. K. (2004). Fitness Estimation through Performance Comparison of F 1 Hybrids with their Parental Species Oryza rufipogon and O . sativa. Annals of Botany, 93, 311–316. http://doi.org/10.1093/aob/mch037
rice	9	Song-Qian_2010	82	oryza_sativa	Y0003	commercial_line	domGE	bar	1	controlled	862	total_number	NA	NA	NA	NA	NA	NA	NA	85.5	cm	NA	NA	Song, X., Wang, Z., & Qiang, S. (2011). Agronomic performance of F1, F2 and F3 hybrids between weedy rice and transgenic glufosinate-resistant rice. Pest Management Science, 67(8), 921–931. http://doi.org/10.1002/ps.2132
rice	9	Song-Qian_2010	83	oryza_sativa	99-t	commercial_line	domGE	bar	1	controlled	1003	total_number	NA	NA	NA	NA	NA	NA	NA	120.4	cm	NA	NA	Song, X., Wang, Z., & Qiang, S. (2011). Agronomic performance of F1, F2 and F3 hybrids between weedy rice and transgenic glufosinate-resistant rice. Pest Management Science, 67(8), 921–931. http://doi.org/10.1002/ps.2132
rice	9	Song-Qian_2010	84	oryza_sativa	wild/Y0003	commercial_line	domGE	bar	1	controlled	2066	total_number	58.4	%	NA	NA	NA	NA	NA	128	cm	NA	NA	Song, X., Wang, Z., & Qiang, S. (2011). Agronomic performance of F1, F2 and F3 hybrids between weedy rice and transgenic glufosinate-resistant rice. Pest Management Science, 67(8), 921–931. http://doi.org/10.1002/ps.2132
rice	9	Song-Qian_2010	85	oryza_sativa	Y0003/wild	commercial_line	domGE	bar	1	controlled	2078	total_number	87.4	%	54.8	%	83	NA	NA	114.3	cm	NA	NA	Song, X., Wang, Z., & Qiang, S. (2011). Agronomic performance of F1, F2 and F3 hybrids between weedy rice and transgenic glufosinate-resistant rice. Pest Management Science, 67(8), 921–931. http://doi.org/10.1002/ps.2132
rice	9	Song-Qian_2010	86	oryza_sativa	wild/99-t	commercial_line	domGE	bar	1	controlled	1848	total_number	33.9	%	NA	NA	NA	6.4	total_number	136.6	cm	NA	NA	Song, X., Wang, Z., & Qiang, S. (2011). Agronomic performance of F1, F2 and F3 hybrids between weedy rice and transgenic glufosinate-resistant rice. Pest Management Science, 67(8), 921–931. http://doi.org/10.1002/ps.2132
rice	9	Song-Qian_2010	87	oryza_spp	NA	NA	wild	NA	NA	controlled	1599	total_number	NA	NA	NA	NA	NA	NA	NA	98.2	cm	NA	NA	Song, X., Wang, Z., & Qiang, S. (2011). Agronomic performance of F1, F2 and F3 hybrids between weedy rice and transgenic glufosinate-resistant rice. Pest Management Science, 67(8), 921–931. http://doi.org/10.1002/ps.2132
rice	10	Vaughan_2008	88	oryza_glaberrima	NA	NA	domNGE	NA	NA	controlled	NA	NA	58.6	%	NA	NA	NA	NA	NA	88.5	cm	NA	NA	Vaughan, D. A., Lu, B., & Tomooka, N. (2008). The evolving story of rice evolution. Plant Science, 174, 394–408. http://doi.org/10.1016/j.plantsci.2008.01.016
rice	10	Vaughan_2008	89	oryza_sativa	NA	NA	domNGE	NA	NA	controlled	NA	NA	21.6	%	NA	NA	NA	4.7	total_number	193.37	cm	NA	NA	Vaughan, D. A., Lu, B., & Tomooka, N. (2008). The evolving story of rice evolution. Plant Science, 174, 394–408. http://doi.org/10.1016/j.plantsci.2008.01.016
rice	10	Vaughan_2008	90	oryza_barthii	NA	NA	wild	NA	NA	controlled	NA	NA	14.06	%	NA	NA	NA	5.6	total_number	101	cm	NA	NA	Vaughan, D. A., Lu, B., & Tomooka, N. (2008). The evolving story of rice evolution. Plant Science, 174, 394–408. http://doi.org/10.1016/j.plantsci.2008.01.016
rice	10	Vaughan_2008	91	oryza_nivara	NA	NA	wild	NA	NA	controlled	NA	NA	63.89	%	NA	NA	NA	NA	NA	11.17	cm	NA	NA	Vaughan, D. A., Lu, B., & Tomooka, N. (2008). The evolving story of rice evolution. Plant Science, 174, 394–408. http://doi.org/10.1016/j.plantsci.2008.01.016
rice	10	Vaughan_2008	92	oryza_rufipogon	NA	NA	wild	NA	NA	controlled	NA	NA	49.16	%	NA	NA	NA	NA	NA	115.37	cm	NA	NA	Vaughan, D. A., Lu, B., & Tomooka, N. (2008). The evolving story of rice evolution. Plant Science, 174, 394–408. http://doi.org/10.1016/j.plantsci.2008.01.016
rice	11	Xia_2016	93	oryza_sativa	MH86	commercial_line	domNGE	NA	NA	controlled	216	total_number	NA	NA	NA	NA	NA	NA	NA	105	cm	NA	NA	Xia, H., Zhang, H., Wang, W., Yang, X., Wang, F., Su, J., … Lu, B. (2016). Ambient insect pressure and recipient genotypes determine fecundity of transgenic crop-weed rice hybrid progeny : Implications for environmental biosafety assessment. Evolutionary Applications, 847–856. http://doi.org/10.1111/eva.12369
rice	11	Xia_2016	94	oryza_sativa	MH86	commercial_line	domNGE	NA	NA	controlled	247	total_number	NA	NA	NA	NA	NA	NA	NA	121.3	cm	NA	NA	Xia, H., Zhang, H., Wang, W., Yang, X., Wang, F., Su, J., … Lu, B. (2016). Ambient insect pressure and recipient genotypes determine fecundity of transgenic crop-weed rice hybrid progeny : Implications for environmental biosafety assessment. Evolutionary Applications, 847–856. http://doi.org/10.1111/eva.12369
rice	11	Xia_2016	95	oryza_sativa	MH86	commercial_line	domNGE	NA	NA	controlled	150	total_number	NA	NA	NA	NA	NA	NA	NA	63.02	cm	NA	NA	Xia, H., Zhang, H., Wang, W., Yang, X., Wang, F., Su, J., … Lu, B. (2016). Ambient insect pressure and recipient genotypes determine fecundity of transgenic crop-weed rice hybrid progeny : Implications for environmental biosafety assessment. Evolutionary Applications, 847–856. http://doi.org/10.1111/eva.12369
rice	11	Xia_2016	96	oryza_sativa	MH86	commercial_line	domNGE	NA	NA	controlled	391	total_number	NA	NA	NA	NA	NA	NA	NA	108.2	cm	NA	NA	Xia, H., Zhang, H., Wang, W., Yang, X., Wang, F., Su, J., … Lu, B. (2016). Ambient insect pressure and recipient genotypes determine fecundity of transgenic crop-weed rice hybrid progeny : Implications for environmental biosafety assessment. Evolutionary Applications, 847–856. http://doi.org/10.1111/eva.12369
rice	11	Xia_2016	97	oryza_sativa	MH86	commercial_line	domNGE	NA	NA	controlled	204	total_number	NA	NA	NA	NA	NA	NA	NA	134.1	cm	NA	NA	Xia, H., Zhang, H., Wang, W., Yang, X., Wang, F., Su, J., … Lu, B. (2016). Ambient insect pressure and recipient genotypes determine fecundity of transgenic crop-weed rice hybrid progeny : Implications for environmental biosafety assessment. Evolutionary Applications, 847–856. http://doi.org/10.1111/eva.12369
rice	11	Xia_2016	98	oryza_sativa	MF1	commercial_line	domGE	CpT1	2	controlled	252	total_number	NA	NA	NA	NA	NA	NA	NA	95.8	cm	NA	NA	Xia, H., Zhang, H., Wang, W., Yang, X., Wang, F., Su, J., … Lu, B. (2016). Ambient insect pressure and recipient genotypes determine fecundity of transgenic crop-weed rice hybrid progeny : Implications for environmental biosafety assessment. Evolutionary Applications, 847–856. http://doi.org/10.1111/eva.12369
rice	11	Xia_2016	99	oryza_sativa	MF1	commercial_line	domGE	CpT1	2	controlled	323	total_number	NA	NA	NA	NA	NA	NA	NA	96.6	cm	NA	NA	Xia, H., Zhang, H., Wang, W., Yang, X., Wang, F., Su, J., … Lu, B. (2016). Ambient insect pressure and recipient genotypes determine fecundity of transgenic crop-weed rice hybrid progeny : Implications for environmental biosafety assessment. Evolutionary Applications, 847–856. http://doi.org/10.1111/eva.12369
rice	11	Xia_2016	100	oryza_sativa	MF1	commercial_line	domGE	CpT1	2	controlled	168	total_number	NA	NA	NA	NA	NA	NA	NA	131.1	cm	NA	NA	Xia, H., Zhang, H., Wang, W., Yang, X., Wang, F., Su, J., … Lu, B. (2016). Ambient insect pressure and recipient genotypes determine fecundity of transgenic crop-weed rice hybrid progeny : Implications for environmental biosafety assessment. Evolutionary Applications, 847–856. http://doi.org/10.1111/eva.12369
rice	11	Xia_2016	101	oryza_sativa	MF1	commercial_line	domGE	CpT1	2	controlled	414	total_number	NA	NA	NA	NA	NA	NA	NA	88.2	cm	NA	NA	Xia, H., Zhang, H., Wang, W., Yang, X., Wang, F., Su, J., … Lu, B. (2016). Ambient insect pressure and recipient genotypes determine fecundity of transgenic crop-weed rice hybrid progeny : Implications for environmental biosafety assessment. Evolutionary Applications, 847–856. http://doi.org/10.1111/eva.12369
rice	11	Xia_2016	102	oryza_sativa	MF1	commercial_line	domGE	CpT1	2	controlled	234	total_number	NA	NA	NA	NA	NA	NA	NA	88.9	cm	NA	NA	Xia, H., Zhang, H., Wang, W., Yang, X., Wang, F., Su, J., … Lu, B. (2016). Ambient insect pressure and recipient genotypes determine fecundity of transgenic crop-weed rice hybrid progeny : Implications for environmental biosafety assessment. Evolutionary Applications, 847–856. http://doi.org/10.1111/eva.12369
rice	12	Yang_2012	103	oryza_sativa	NA	commercial_line	domGE	CpT1	2	controlled	700	total_number	NA	NA	NA	NA	NA	NA	NA	109.1	cm	NA	NA	Yang, X., Wang, F., Su, J., & Lu, B. R. (2012). Limited fitness advantages of crop-weed hybrid progeny containing insect-resistant transgenes (Bt/CpTi) in transgenic rice field. PLoS ONE, 7(7), 1–7. http://doi.org/10.1371/journal.pone.0041220
rice	12	Yang_2012	104	oryza_sativa	NA	commercial_line	domGE	CpT1	2	controlled	430	total_number	NA	NA	NA	NA	NA	NA	NA	109	cm	NA	NA	Yang, X., Wang, F., Su, J., & Lu, B. R. (2012). Limited fitness advantages of crop-weed hybrid progeny containing insect-resistant transgenes (Bt/CpTi) in transgenic rice field. PLoS ONE, 7(7), 1–7. http://doi.org/10.1371/journal.pone.0041220
rice	12	Yang_2012	105	oryza_sativa	NA	NA	wild	NA	NA	controlled	550	total_number	NA	NA	NA	NA	NA	NA	NA	149	cm	NA	NA	Yang, X., Wang, F., Su, J., & Lu, B. R. (2012). Limited fitness advantages of crop-weed hybrid progeny containing insect-resistant transgenes (Bt/CpTi) in transgenic rice field. PLoS ONE, 7(7), 1–7. http://doi.org/10.1371/journal.pone.0041220
rice	13	Zhang_2003	106	oryza_sativa	Cypress	commercial_line	domNGE	NA	NA	controlled	1047	total_number	NA	NA	NA	NA	NA	NA	NA	78.3	cm	NA	NA	Zhang, N., Linscombe, S., & Oard, J. (2003). Out-crossing frequency and genetic analysis of hybrids between transgenic glufosinate herbicide-resistant rice and the weed, red rice. Euphytica, 130(1), 35–45. http://doi.org/10.1023/A:1022371104679
rice	13	Zhang_2003	107	oryza_spp	Cypress/wild	commercial_line	domNGE	NA	NA	controlled	344	total_number	NA	NA	NA	NA	NA	NA	NA	112.3	cm	NA	NA	Zhang, N., Linscombe, S., & Oard, J. (2003). Out-crossing frequency and genetic analysis of hybrids between transgenic glufosinate herbicide-resistant rice and the weed, red rice. Euphytica, 130(1), 35–45. http://doi.org/10.1023/A:1022371104679
rice	13	Zhang_2003	108	oryza_sativa	Liberty/wild	commercial_line	domGE	bar	1	controlled	492.2	total_number	NA	NA	NA	NA	NA	NA	NA	116.2	cm	NA	NA	Zhang, N., Linscombe, S., & Oard, J. (2003). Out-crossing frequency and genetic analysis of hybrids between transgenic glufosinate herbicide-resistant rice and the weed, red rice. Euphytica, 130(1), 35–45. http://doi.org/10.1023/A:1022371104679
rice	13	Zhang_2003	109	oryza_sativa	Liberty	commercial_line	domGE	bar	1	controlled	871.6	total_number	NA	NA	NA	NA	NA	NA	NA	136.5	cm	NA	NA	Zhang, N., Linscombe, S., & Oard, J. (2003). Out-crossing frequency and genetic analysis of hybrids between transgenic glufosinate herbicide-resistant rice and the weed, red rice. Euphytica, 130(1), 35–45. http://doi.org/10.1023/A:1022371104679
rice	13	Zhang_2003	110	oryza_spp	NA	NA	wild	NA	NA	controlled	142.5	total_number	NA	NA	NA	NA	NA	NA	NA	59.57	cm	NA	NA	Zhang, N., Linscombe, S., & Oard, J. (2003). Out-crossing frequency and genetic analysis of hybrids between transgenic glufosinate herbicide-resistant rice and the weed, red rice. Euphytica, 130(1), 35–45. http://doi.org/10.1023/A:1022371104679
rice	14	Zhang_2012	111	oryza_sativa	CK	commercial_line	domNGE	NA	NA	controlled	NA	NA	NA	NA	NA	NA	NA	NA	NA	149.1	cm	NA	NA	Zhang, F., Lei, S., Liu, Y., Guo, L., Yin, Q., Song, J., & Wang, D. (2012). Differences in ecological fitness between Bt transgenic rice and conventional rice under insect-infestation pressures. Agricultural Science & Technology, 13(12), 2489–2495. http://doi.org/10.1017/CBO9781107415324.004
rice	14	Zhang_2012	112	oryza_sativa	Bt63	commercial_line	domGE	Bt	2	controlled	NA	NA	NA	NA	NA	NA	NA	NA	NA	145.1	cm	NA	NA	Zhang, F., Lei, S., Liu, Y., Guo, L., Yin, Q., Song, J., & Wang, D. (2012). Differences in ecological fitness between Bt transgenic rice and conventional rice under insect-infestation pressures. Agricultural Science & Technology, 13(12), 2489–2495. http://doi.org/10.1017/CBO9781107415324.004
rice	14	Zhang_2012	113	oryza_sativa	Bt63/CK	commercial_line	domGE	Bt	2	controlled	NA	NA	NA	NA	NA	NA	NA	NA	NA	141.4	cm	NA	NA	Zhang, F., Lei, S., Liu, Y., Guo, L., Yin, Q., Song, J., & Wang, D. (2012). Differences in ecological fitness between Bt transgenic rice and conventional rice under insect-infestation pressures. Agricultural Science & Technology, 13(12), 2489–2495. http://doi.org/10.1017/CBO9781107415324.004
rice	15	Shengnan_2016	114	oryza_sativa	Y0003	hybrid	domGE	Bt	NA	controlled	NA	NA	92	%	NA	NA	NA	NA	NA	81.16	cm	NA	NA	Shengnan, L., Xiaoling, S., Yanhua, H., Weiming, D., & Sheng, Q. (2016). Fitness of hybrids between two types of transgenic rice and six japonica and indica weed rice accessions. Crop Science, 56(5), 2751–2765. http://doi.org/10.2135/cropsci2015.11.0719
rice	15	Shengnan_2016	115	oryza_sativa	WRDD	NA	wild	NA	NA	controlled	NA	NA	90	%	49.6	%	81.7	NA	NA	130	cm	NA	NA	Shengnan, L., Xiaoling, S., Yanhua, H., Weiming, D., & Sheng, Q. (2016). Fitness of hybrids between two types of transgenic rice and six japonica and indica weed rice accessions. Crop Science, 56(5), 2751–2765. http://doi.org/10.2135/cropsci2015.11.0719
rice	15	Shengnan_2016	116	oryza_sativa	Y0003	hybrid	domGE	bar	1	controlled	NA	NA	86	%	NA	NA	NA	NA	NA	NA	NA	NA	NA	Shengnan, L., Xiaoling, S., Yanhua, H., Weiming, D., & Sheng, Q. (2016). Fitness of hybrids between two types of transgenic rice and six japonica and indica weed rice accessions. Crop Science, 56(5), 2751–2765. http://doi.org/10.2135/cropsci2015.11.0719
rice	15	Shengnan_2016	117	oryza_sativa	WRDD	NA	wild	NA	NA	controlled	NA	NA	93	%	NA	NA	NA	NA	NA	141.89	cm	NA	NA	Shengnan, L., Xiaoling, S., Yanhua, H., Weiming, D., & Sheng, Q. (2016). Fitness of hybrids between two types of transgenic rice and six japonica and indica weed rice accessions. Crop Science, 56(5), 2751–2765. http://doi.org/10.2135/cropsci2015.11.0719
rice	15	Shengnan_2016	118	oryza_sativa	Y0003	hybrid	domGE	bar	1	controlled	NA	NA	95.99	%	85	%	107	NA	NA	104	cm	NA	NA	Shengnan, L., Xiaoling, S., Yanhua, H., Weiming, D., & Sheng, Q. (2016). Fitness of hybrids between two types of transgenic rice and six japonica and indica weed rice accessions. Crop Science, 56(5), 2751–2765. http://doi.org/10.2135/cropsci2015.11.0719
rice	15	Shengnan_2016	119	oryza_sativa	WRDD	NA	wild	NA	NA	controlled	NA	NA	88.79	%	31.9	%	74.5	NA	NA	NA	NA	NA	NA	Shengnan, L., Xiaoling, S., Yanhua, H., Weiming, D., & Sheng, Q. (2016). Fitness of hybrids between two types of transgenic rice and six japonica and indica weed rice accessions. Crop Science, 56(5), 2751–2765. http://doi.org/10.2135/cropsci2015.11.0719
rice	15	Shengnan_2016	120	oryza_sativa	Y0003	hybrid	domGE	bar	1	controlled	NA	NA	90.75	%	38.9	%	91.2	NA	NA	106.3	cm	NA	NA	Shengnan, L., Xiaoling, S., Yanhua, H., Weiming, D., & Sheng, Q. (2016). Fitness of hybrids between two types of transgenic rice and six japonica and indica weed rice accessions. Crop Science, 56(5), 2751–2765. http://doi.org/10.2135/cropsci2015.11.0719
rice	15	Shengnan_2016	121	oryza_sativa	WRSY	NA	wild	NA	NA	controlled	NA	NA	87.89	%	41.3	%	84.7	NA	NA	127	NA	NA	NA	Shengnan, L., Xiaoling, S., Yanhua, H., Weiming, D., & Sheng, Q. (2016). Fitness of hybrids between two types of transgenic rice and six japonica and indica weed rice accessions. Crop Science, 56(5), 2751–2765. http://doi.org/10.2135/cropsci2015.11.0719
rice	15	Shengnan_2016	122	oryza_sativa	Y0003	hybrid	domGE	bar	1	controlled	NA	NA	90.75	%	42.2	%	90.2	NA	NA	131	NA	NA	NA	Shengnan, L., Xiaoling, S., Yanhua, H., Weiming, D., & Sheng, Q. (2016). Fitness of hybrids between two types of transgenic rice and six japonica and indica weed rice accessions. Crop Science, 56(5), 2751–2765. http://doi.org/10.2135/cropsci2015.11.0719
rice	15	Shengnan_2016	123	oryza_sativa	WRSY	NA	wild	NA	NA	controlled	NA	NA	90.27	%	60.3	%	92	NA	NA	126	NA	NA	NA	Shengnan, L., Xiaoling, S., Yanhua, H., Weiming, D., & Sheng, Q. (2016). Fitness of hybrids between two types of transgenic rice and six japonica and indica weed rice accessions. Crop Science, 56(5), 2751–2765. http://doi.org/10.2135/cropsci2015.11.0719
rice	15	Shengnan_2016	124	oryza_sativa	Y0003	hybrid	domGE	bar	1	controlled	NA	NA	94.22	%	68	%	99	NA	NA	114.8	NA	NA	NA	Shengnan, L., Xiaoling, S., Yanhua, H., Weiming, D., & Sheng, Q. (2016). Fitness of hybrids between two types of transgenic rice and six japonica and indica weed rice accessions. Crop Science, 56(5), 2751–2765. http://doi.org/10.2135/cropsci2015.11.0719
rice	15	Shengnan_2016	125	oryza_sativa	WRSY	NA	wild	NA	NA	controlled	NA	NA	87.89	%	71.9	%	90	NA	NA	NA	NA	NA	NA	Shengnan, L., Xiaoling, S., Yanhua, H., Weiming, D., & Sheng, Q. (2016). Fitness of hybrids between two types of transgenic rice and six japonica and indica weed rice accessions. Crop Science, 56(5), 2751–2765. http://doi.org/10.2135/cropsci2015.11.0719
rice	15	Shengnan_2016	126	oryza_sativa	Y0003	hybrid	domGE	bar	1	controlled	NA	NA	58.64	%	NA	NA	NA	NA	NA	134.8	cm	NA	NA	Shengnan, L., Xiaoling, S., Yanhua, H., Weiming, D., & Sheng, Q. (2016). Fitness of hybrids between two types of transgenic rice and six japonica and indica weed rice accessions. Crop Science, 56(5), 2751–2765. http://doi.org/10.2135/cropsci2015.11.0719
rice	15	Shengnan_2016	127	oryza_sativa	WRT2	NA	wild	NA	NA	controlled	NA	NA	91.59	%	NA	NA	NA	NA	NA	NA	NA	NA	NA	Shengnan, L., Xiaoling, S., Yanhua, H., Weiming, D., & Sheng, Q. (2016). Fitness of hybrids between two types of transgenic rice and six japonica and indica weed rice accessions. Crop Science, 56(5), 2751–2765. http://doi.org/10.2135/cropsci2015.11.0719
rice	15	Shengnan_2016	128	oryza_sativa	Y0003	hybrid	domGE	bar	1	controlled	NA	NA	75.47	%	NA	NA	NA	NA	NA	108.7	cm	NA	NA	Shengnan, L., Xiaoling, S., Yanhua, H., Weiming, D., & Sheng, Q. (2016). Fitness of hybrids between two types of transgenic rice and six japonica and indica weed rice accessions. Crop Science, 56(5), 2751–2765. http://doi.org/10.2135/cropsci2015.11.0719
rice	15	Shengnan_2016	129	oryza_sativa	WRT2	NA	wild	NA	NA	controlled	NA	NA	94.51	%	83	%	100	NA	NA	143	cm	NA	NA	Shengnan, L., Xiaoling, S., Yanhua, H., Weiming, D., & Sheng, Q. (2016). Fitness of hybrids between two types of transgenic rice and six japonica and indica weed rice accessions. Crop Science, 56(5), 2751–2765. http://doi.org/10.2135/cropsci2015.11.0719
rice	15	Shengnan_2016	130	oryza_sativa	Y0003	hybrid	domGE	bar	1	controlled	NA	NA	80.51	%	NA	NA	NA	NA	NA	NA	NA	NA	NA	Shengnan, L., Xiaoling, S., Yanhua, H., Weiming, D., & Sheng, Q. (2016). Fitness of hybrids between two types of transgenic rice and six japonica and indica weed rice accessions. Crop Science, 56(5), 2751–2765. http://doi.org/10.2135/cropsci2015.11.0719
rice	15	Shengnan_2016	131	oryza_sativa	WRT2	NA	wild	NA	NA	controlled	NA	NA	91.59	%	NA	NA	NA	NA	NA	101.95	cm	NA	NA	Shengnan, L., Xiaoling, S., Yanhua, H., Weiming, D., & Sheng, Q. (2016). Fitness of hybrids between two types of transgenic rice and six japonica and indica weed rice accessions. Crop Science, 56(5), 2751–2765. http://doi.org/10.2135/cropsci2015.11.0719
rice	15	Shengnan_2016	132	oryza_sativa	Y0003	hybrid	domGE	bar	1	controlled	NA	NA	53.05	%	NA	NA	NA	NA	NA	136.87	cm	NA	NA	Shengnan, L., Xiaoling, S., Yanhua, H., Weiming, D., & Sheng, Q. (2016). Fitness of hybrids between two types of transgenic rice and six japonica and indica weed rice accessions. Crop Science, 56(5), 2751–2765. http://doi.org/10.2135/cropsci2015.11.0719
rice	15	Shengnan_2016	133	oryza_sativa	WRC2	NA	wild	NA	NA	controlled	NA	NA	94.32	%	95	%	85	NA	NA	NA	NA	NA	NA	Shengnan, L., Xiaoling, S., Yanhua, H., Weiming, D., & Sheng, Q. (2016). Fitness of hybrids between two types of transgenic rice and six japonica and indica weed rice accessions. Crop Science, 56(5), 2751–2765. http://doi.org/10.2135/cropsci2015.11.0719
rice	15	Shengnan_2016	134	oryza_sativa	Y0003	hybrid	domGE	bar	1	controlled	NA	NA	68.45	%	NA	NA	NA	NA	NA	143.6	cm	NA	NA	Shengnan, L., Xiaoling, S., Yanhua, H., Weiming, D., & Sheng, Q. (2016). Fitness of hybrids between two types of transgenic rice and six japonica and indica weed rice accessions. Crop Science, 56(5), 2751–2765. http://doi.org/10.2135/cropsci2015.11.0719
rice	15	Shengnan_2016	135	oryza_sativa	WRC2	NA	wild	NA	NA	controlled	NA	NA	96.23	%	95	%	106	NA	NA	19	cm	NA	NA	Shengnan, L., Xiaoling, S., Yanhua, H., Weiming, D., & Sheng, Q. (2016). Fitness of hybrids between two types of transgenic rice and six japonica and indica weed rice accessions. Crop Science, 56(5), 2751–2765. http://doi.org/10.2135/cropsci2015.11.0719
rice	15	Shengnan_2016	136	oryza_sativa	Y0003	hybrid	domGE	bar	1	controlled	NA	NA	81.46	%	NA	NA	NA	NA	NA	NA	NA	NA	NA	Shengnan, L., Xiaoling, S., Yanhua, H., Weiming, D., & Sheng, Q. (2016). Fitness of hybrids between two types of transgenic rice and six japonica and indica weed rice accessions. Crop Science, 56(5), 2751–2765. http://doi.org/10.2135/cropsci2015.11.0719
rice	15	Shengnan_2016	137	oryza_sativa	WRC2	NA	wild	NA	NA	controlled	NA	NA	94.32	%	78	%	102	NA	NA	112.9	cm	NA	NA	Shengnan, L., Xiaoling, S., Yanhua, H., Weiming, D., & Sheng, Q. (2016). Fitness of hybrids between two types of transgenic rice and six japonica and indica weed rice accessions. Crop Science, 56(5), 2751–2765. http://doi.org/10.2135/cropsci2015.11.0719
rice	15	Shengnan_2016	138	oryza_sativa	Y0003	hybrid	domGE	bar	1	controlled	NA	NA	48.37	%	NA	NA	NA	NA	NA	109.27	cm	NA	NA	Shengnan, L., Xiaoling, S., Yanhua, H., Weiming, D., & Sheng, Q. (2016). Fitness of hybrids between two types of transgenic rice and six japonica and indica weed rice accessions. Crop Science, 56(5), 2751–2765. http://doi.org/10.2135/cropsci2015.11.0719
rice	15	Shengnan_2016	139	oryza_sativa	WRZJ	NA	wild	NA	NA	controlled	NA	NA	93.95	%	85	%	97	11.83	total_number	155.9	cm	NA	NA	Shengnan, L., Xiaoling, S., Yanhua, H., Weiming, D., & Sheng, Q. (2016). Fitness of hybrids between two types of transgenic rice and six japonica and indica weed rice accessions. Crop Science, 56(5), 2751–2765. http://doi.org/10.2135/cropsci2015.11.0719
rice	15	Shengnan_2016	140	oryza_sativa	Y0003	hybrid	domGE	bar	1	controlled	NA	NA	77.77	%	NA	NA	NA	NA	NA	117.08	cm	NA	NA	Shengnan, L., Xiaoling, S., Yanhua, H., Weiming, D., & Sheng, Q. (2016). Fitness of hybrids between two types of transgenic rice and six japonica and indica weed rice accessions. Crop Science, 56(5), 2751–2765. http://doi.org/10.2135/cropsci2015.11.0719
rice	15	Shengnan_2016	141	oryza_sativa	WRZJ	NA	wild	NA	NA	controlled	NA	NA	95.35	%	58	%	99	NA	NA	127	cm	NA	NA	Shengnan, L., Xiaoling, S., Yanhua, H., Weiming, D., & Sheng, Q. (2016). Fitness of hybrids between two types of transgenic rice and six japonica and indica weed rice accessions. Crop Science, 56(5), 2751–2765. http://doi.org/10.2135/cropsci2015.11.0719
rice	15	Shengnan_2016	142	oryza_sativa	Y0003	hybrid	domGE	bar	1	controlled	NA	NA	78.91	%	NA	NA	NA	NA	NA	108.57	cm	NA	NA	Shengnan, L., Xiaoling, S., Yanhua, H., Weiming, D., & Sheng, Q. (2016). Fitness of hybrids between two types of transgenic rice and six japonica and indica weed rice accessions. Crop Science, 56(5), 2751–2765. http://doi.org/10.2135/cropsci2015.11.0719
rice	15	Shengnan_2016	143	oryza_sativa	WRZJ	NA	wild	NA	NA	controlled	NA	NA	93.95	%	90	%	103	NA	NA	151.7	cm	NA	NA	Shengnan, L., Xiaoling, S., Yanhua, H., Weiming, D., & Sheng, Q. (2016). Fitness of hybrids between two types of transgenic rice and six japonica and indica weed rice accessions. Crop Science, 56(5), 2751–2765. http://doi.org/10.2135/cropsci2015.11.0719
rice	15	Shengnan_2016	144	oryza_sativa	Y0003	hybrid	domGE	bar	1	controlled	NA	NA	62.08	%	NA	NA	NA	NA	NA	105	cm	NA	NA	Shengnan, L., Xiaoling, S., Yanhua, H., Weiming, D., & Sheng, Q. (2016). Fitness of hybrids between two types of transgenic rice and six japonica and indica weed rice accessions. Crop Science, 56(5), 2751–2765. http://doi.org/10.2135/cropsci2015.11.0719
rice	15	Shengnan_2016	145	oryza_sativa	WRZQ	NA	wild	NA	NA	controlled	NA	NA	96.66	%	94	%	110	NA	NA	143	cm	NA	NA	Shengnan, L., Xiaoling, S., Yanhua, H., Weiming, D., & Sheng, Q. (2016). Fitness of hybrids between two types of transgenic rice and six japonica and indica weed rice accessions. Crop Science, 56(5), 2751–2765. http://doi.org/10.2135/cropsci2015.11.0719
rice	15	Shengnan_2016	146	oryza_sativa	Y0003	hybrid	domGE	bar	1	controlled	NA	NA	77.26	%	NA	NA	NA	NA	NA	109.21	cm	NA	NA	Shengnan, L., Xiaoling, S., Yanhua, H., Weiming, D., & Sheng, Q. (2016). Fitness of hybrids between two types of transgenic rice and six japonica and indica weed rice accessions. Crop Science, 56(5), 2751–2765. http://doi.org/10.2135/cropsci2015.11.0719
rice	15	Shengnan_2016	147	oryza_sativa	WRZQ	NA	wild	NA	NA	controlled	NA	NA	96.08	%	85	%	99	NA	NA	NA	NA	NA	NA	Shengnan, L., Xiaoling, S., Yanhua, H., Weiming, D., & Sheng, Q. (2016). Fitness of hybrids between two types of transgenic rice and six japonica and indica weed rice accessions. Crop Science, 56(5), 2751–2765. http://doi.org/10.2135/cropsci2015.11.0719
rice	15	Shengnan_2016	148	oryza_sativa	Y0003	hybrid	domGE	bar	1	controlled	NA	NA	88.26	%	84.3	%	85.2	NA	NA	157.8	cm	NA	NA	Shengnan, L., Xiaoling, S., Yanhua, H., Weiming, D., & Sheng, Q. (2016). Fitness of hybrids between two types of transgenic rice and six japonica and indica weed rice accessions. Crop Science, 56(5), 2751–2765. http://doi.org/10.2135/cropsci2015.11.0719
rice	15	Shengnan_2016	149	oryza_sativa	WRZQ	NA	wild	NA	NA	controlled	NA	NA	96.66	%	96	%	106	NA	NA	146	cm	NA	NA	Shengnan, L., Xiaoling, S., Yanhua, H., Weiming, D., & Sheng, Q. (2016). Fitness of hybrids between two types of transgenic rice and six japonica and indica weed rice accessions. Crop Science, 56(5), 2751–2765. http://doi.org/10.2135/cropsci2015.11.0719
rice	15	Shengnan_2016	150	oryza_sativa	86B	hybrid	domGE	bar	1	controlled	NA	NA	57.67	%	NA	NA	NA	NA	NA	92.3	cm	NA	NA	Shengnan, L., Xiaoling, S., Yanhua, H., Weiming, D., & Sheng, Q. (2016). Fitness of hybrids between two types of transgenic rice and six japonica and indica weed rice accessions. Crop Science, 56(5), 2751–2765. http://doi.org/10.2135/cropsci2015.11.0719
rice	15	Shengnan_2016	151	oryza_sativa	WRDD	NA	wild	NA	NA	controlled	NA	NA	88.89	%	77.2	%	75.7	NA	NA	NA	NA	NA	NA	Shengnan, L., Xiaoling, S., Yanhua, H., Weiming, D., & Sheng, Q. (2016). Fitness of hybrids between two types of transgenic rice and six japonica and indica weed rice accessions. Crop Science, 56(5), 2751–2765. http://doi.org/10.2135/cropsci2015.11.0719
rice	15	Shengnan_2016	152	oryza_sativa	86B	hybrid	domGE	bar	1	controlled	NA	NA	73.89	%	NA	NA	NA	NA	NA	118.1	cm	NA	NA	Shengnan, L., Xiaoling, S., Yanhua, H., Weiming, D., & Sheng, Q. (2016). Fitness of hybrids between two types of transgenic rice and six japonica and indica weed rice accessions. Crop Science, 56(5), 2751–2765. http://doi.org/10.2135/cropsci2015.11.0719
rice	15	Shengnan_2016	153	oryza_sativa	WRDD	NA	wild	NA	NA	controlled	NA	NA	89.56	%	40	%	92	NA	NA	97.6	cm	NA	NA	Shengnan, L., Xiaoling, S., Yanhua, H., Weiming, D., & Sheng, Q. (2016). Fitness of hybrids between two types of transgenic rice and six japonica and indica weed rice accessions. Crop Science, 56(5), 2751–2765. http://doi.org/10.2135/cropsci2015.11.0719
rice	15	Shengnan_2016	154	oryza_sativa	86B	hybrid	domGE	bar	1	controlled	NA	NA	74.43	%	NA	NA	NA	NA	NA	121.29	cm	NA	NA	Shengnan, L., Xiaoling, S., Yanhua, H., Weiming, D., & Sheng, Q. (2016). Fitness of hybrids between two types of transgenic rice and six japonica and indica weed rice accessions. Crop Science, 56(5), 2751–2765. http://doi.org/10.2135/cropsci2015.11.0719
rice	15	Shengnan_2016	155	oryza_sativa	WRDD	NA	wild	NA	NA	controlled	NA	NA	93	%	NA	NA	NA	NA	NA	121.82	cm	NA	NA	Shengnan, L., Xiaoling, S., Yanhua, H., Weiming, D., & Sheng, Q. (2016). Fitness of hybrids between two types of transgenic rice and six japonica and indica weed rice accessions. Crop Science, 56(5), 2751–2765. http://doi.org/10.2135/cropsci2015.11.0719
rice	15	Shengnan_2016	156	oryza_sativa	86B	hybrid	domGE	bar	1	controlled	NA	NA	65.5	%	NA	NA	NA	NA	NA	107.67	cm	NA	NA	Shengnan, L., Xiaoling, S., Yanhua, H., Weiming, D., & Sheng, Q. (2016). Fitness of hybrids between two types of transgenic rice and six japonica and indica weed rice accessions. Crop Science, 56(5), 2751–2765. http://doi.org/10.2135/cropsci2015.11.0719
rice	15	Shengnan_2016	157	oryza_sativa	WRSY	NA	wild	NA	NA	controlled	NA	NA	90.45	%	83.2	%	84.7	NA	NA	112.2	cm	NA	NA	Shengnan, L., Xiaoling, S., Yanhua, H., Weiming, D., & Sheng, Q. (2016). Fitness of hybrids between two types of transgenic rice and six japonica and indica weed rice accessions. Crop Science, 56(5), 2751–2765. http://doi.org/10.2135/cropsci2015.11.0719
rice	15	Shengnan_2016	158	oryza_sativa	86B	hybrid	domGE	bar	1	controlled	NA	NA	82.22	%	NA	NA	NA	NA	NA	NA	NA	NA	NA	Shengnan, L., Xiaoling, S., Yanhua, H., Weiming, D., & Sheng, Q. (2016). Fitness of hybrids between two types of transgenic rice and six japonica and indica weed rice accessions. Crop Science, 56(5), 2751–2765. http://doi.org/10.2135/cropsci2015.11.0719
rice	15	Shengnan_2016	159	oryza_sativa	WRSY	NA	wild	NA	NA	controlled	NA	NA	91.33	%	NA	NA	NA	NA	NA	NA	NA	NA	NA	Shengnan, L., Xiaoling, S., Yanhua, H., Weiming, D., & Sheng, Q. (2016). Fitness of hybrids between two types of transgenic rice and six japonica and indica weed rice accessions. Crop Science, 56(5), 2751–2765. http://doi.org/10.2135/cropsci2015.11.0719
rice	15	Shengnan_2016	160	oryza_sativa	86B	hybrid	domGE	bar	1	controlled	NA	NA	72.4	%	NA	NA	NA	NA	NA	119.22	cm	NA	NA	Shengnan, L., Xiaoling, S., Yanhua, H., Weiming, D., & Sheng, Q. (2016). Fitness of hybrids between two types of transgenic rice and six japonica and indica weed rice accessions. Crop Science, 56(5), 2751–2765. http://doi.org/10.2135/cropsci2015.11.0719
rice	15	Shengnan_2016	161	oryza_sativa	WRSY	NA	wild	NA	NA	controlled	NA	NA	90.27	%	85.3	%	85.5	9.32	total_number	160	cm	NA	NA	Shengnan, L., Xiaoling, S., Yanhua, H., Weiming, D., & Sheng, Q. (2016). Fitness of hybrids between two types of transgenic rice and six japonica and indica weed rice accessions. Crop Science, 56(5), 2751–2765. http://doi.org/10.2135/cropsci2015.11.0719
rice	15	Shengnan_2016	162	oryza_sativa	86B	hybrid	domGE	bar	1	controlled	NA	NA	96.33	%	92	%	110	NA	NA	163.9	cm	NA	NA	Shengnan, L., Xiaoling, S., Yanhua, H., Weiming, D., & Sheng, Q. (2016). Fitness of hybrids between two types of transgenic rice and six japonica and indica weed rice accessions. Crop Science, 56(5), 2751–2765. http://doi.org/10.2135/cropsci2015.11.0719
rice	15	Shengnan_2016	163	oryza_sativa	WRT2	NA	wild	NA	NA	controlled	NA	NA	97.56	%	92	%	106	NA	NA	146	cm	NA	NA	Shengnan, L., Xiaoling, S., Yanhua, H., Weiming, D., & Sheng, Q. (2016). Fitness of hybrids between two types of transgenic rice and six japonica and indica weed rice accessions. Crop Science, 56(5), 2751–2765. http://doi.org/10.2135/cropsci2015.11.0719
rice	15	Shengnan_2016	164	oryza_sativa	86B	hybrid	domGE	bar	1	controlled	NA	NA	97.5	%	94	%	103	NA	NA	106.2	cm	NA	NA	Shengnan, L., Xiaoling, S., Yanhua, H., Weiming, D., & Sheng, Q. (2016). Fitness of hybrids between two types of transgenic rice and six japonica and indica weed rice accessions. Crop Science, 56(5), 2751–2765. http://doi.org/10.2135/cropsci2015.11.0719
rice	15	Shengnan_2016	165	oryza_sativa	WRT2	NA	wild	NA	NA	controlled	NA	NA	97.67	%	98	%	105	NA	NA	99	cm	NA	NA	Shengnan, L., Xiaoling, S., Yanhua, H., Weiming, D., & Sheng, Q. (2016). Fitness of hybrids between two types of transgenic rice and six japonica and indica weed rice accessions. Crop Science, 56(5), 2751–2765. http://doi.org/10.2135/cropsci2015.11.0719
rice	15	Shengnan_2016	166	oryza_sativa	86B	hybrid	domGE	bar	1	controlled	NA	NA	88.88	%	28.7	%	74.7	NA	NA	132.7	cm	NA	NA	Shengnan, L., Xiaoling, S., Yanhua, H., Weiming, D., & Sheng, Q. (2016). Fitness of hybrids between two types of transgenic rice and six japonica and indica weed rice accessions. Crop Science, 56(5), 2751–2765. http://doi.org/10.2135/cropsci2015.11.0719
rice	15	Shengnan_2016	167	oryza_sativa	WRT2	NA	wild	NA	NA	controlled	NA	NA	94.51	%	82	%	105	NA	NA	149	cm	NA	NA	Shengnan, L., Xiaoling, S., Yanhua, H., Weiming, D., & Sheng, Q. (2016). Fitness of hybrids between two types of transgenic rice and six japonica and indica weed rice accessions. Crop Science, 56(5), 2751–2765. http://doi.org/10.2135/cropsci2015.11.0719
rice	15	Shengnan_2016	168	oryza_sativa	86B	hybrid	domGE	bar	1	controlled	NA	NA	97.11	%	96	%	106	NA	NA	149	cm	NA	NA	Shengnan, L., Xiaoling, S., Yanhua, H., Weiming, D., & Sheng, Q. (2016). Fitness of hybrids between two types of transgenic rice and six japonica and indica weed rice accessions. Crop Science, 56(5), 2751–2765. http://doi.org/10.2135/cropsci2015.11.0719
rice	15	Shengnan_2016	169	oryza_sativa	WRC2	NA	wild	NA	NA	controlled	NA	NA	98.45	%	NA	NA	NA	NA	NA	NA	NA	NA	NA	Shengnan, L., Xiaoling, S., Yanhua, H., Weiming, D., & Sheng, Q. (2016). Fitness of hybrids between two types of transgenic rice and six japonica and indica weed rice accessions. Crop Science, 56(5), 2751–2765. http://doi.org/10.2135/cropsci2015.11.0719
rice	15	Shengnan_2016	170	oryza_sativa	86B	hybrid	domGE	bar	1	controlled	NA	NA	98.34	%	82.94	%	100.6	NA	NA	98.8	cm	NA	NA	Shengnan, L., Xiaoling, S., Yanhua, H., Weiming, D., & Sheng, Q. (2016). Fitness of hybrids between two types of transgenic rice and six japonica and indica weed rice accessions. Crop Science, 56(5), 2751–2765. http://doi.org/10.2135/cropsci2015.11.0719
rice	15	Shengnan_2016	171	oryza_sativa	WRC2	NA	wild	NA	NA	controlled	NA	NA	98.11	%	98.92	%	92.5	NA	NA	131	cm	NA	NA	Shengnan, L., Xiaoling, S., Yanhua, H., Weiming, D., & Sheng, Q. (2016). Fitness of hybrids between two types of transgenic rice and six japonica and indica weed rice accessions. Crop Science, 56(5), 2751–2765. http://doi.org/10.2135/cropsci2015.11.0719
rice	15	Shengnan_2016	172	oryza_sativa	86B	hybrid	domGE	bar	1	controlled	NA	NA	88.92	%	37.6	%	76	NA	NA	132	cm	NA	NA	Shengnan, L., Xiaoling, S., Yanhua, H., Weiming, D., & Sheng, Q. (2016). Fitness of hybrids between two types of transgenic rice and six japonica and indica weed rice accessions. Crop Science, 56(5), 2751–2765. http://doi.org/10.2135/cropsci2015.11.0719
rice	15	Shengnan_2016	173	oryza_sativa	WRC2	NA	wild	NA	NA	controlled	NA	NA	96.23	%	98	%	103	NA	NA	148.1	cm	NA	NA	Shengnan, L., Xiaoling, S., Yanhua, H., Weiming, D., & Sheng, Q. (2016). Fitness of hybrids between two types of transgenic rice and six japonica and indica weed rice accessions. Crop Science, 56(5), 2751–2765. http://doi.org/10.2135/cropsci2015.11.0719
rice	15	Shengnan_2016	174	oryza_sativa	86B	hybrid	domGE	bar	1	controlled	NA	NA	98.78	%	NA	NA	NA	NA	NA	NA	NA	NA	NA	Shengnan, L., Xiaoling, S., Yanhua, H., Weiming, D., & Sheng, Q. (2016). Fitness of hybrids between two types of transgenic rice and six japonica and indica weed rice accessions. Crop Science, 56(5), 2751–2765. http://doi.org/10.2135/cropsci2015.11.0719
rice	15	Shengnan_2016	175	oryza_sativa	WRZJ	NA	wild	NA	NA	controlled	NA	NA	92.11	%	NA	NA	NA	NA	NA	140.2	cm	NA	NA	Shengnan, L., Xiaoling, S., Yanhua, H., Weiming, D., & Sheng, Q. (2016). Fitness of hybrids between two types of transgenic rice and six japonica and indica weed rice accessions. Crop Science, 56(5), 2751–2765. http://doi.org/10.2135/cropsci2015.11.0719
rice	15	Shengnan_2016	176	oryza_sativa	86B	hybrid	domGE	bar	1	controlled	NA	NA	97.89	%	95	%	98	NA	NA	154.3	cm	NA	NA	Shengnan, L., Xiaoling, S., Yanhua, H., Weiming, D., & Sheng, Q. (2016). Fitness of hybrids between two types of transgenic rice and six japonica and indica weed rice accessions. Crop Science, 56(5), 2751–2765. http://doi.org/10.2135/cropsci2015.11.0719
rice	15	Shengnan_2016	177	oryza_sativa	WRZJ	NA	wild	NA	NA	controlled	NA	NA	97.22	%	95	%	103	NA	NA	132.6	cm	NA	NA	Shengnan, L., Xiaoling, S., Yanhua, H., Weiming, D., & Sheng, Q. (2016). Fitness of hybrids between two types of transgenic rice and six japonica and indica weed rice accessions. Crop Science, 56(5), 2751–2765. http://doi.org/10.2135/cropsci2015.11.0719
rice	15	Shengnan_2016	178	oryza_sativa	86B	hybrid	domGE	bar	1	controlled	NA	NA	97.61	%	94	%	107	NA	NA	NA	NA	NA	NA	Shengnan, L., Xiaoling, S., Yanhua, H., Weiming, D., & Sheng, Q. (2016). Fitness of hybrids between two types of transgenic rice and six japonica and indica weed rice accessions. Crop Science, 56(5), 2751–2765. http://doi.org/10.2135/cropsci2015.11.0719
rice	15	Shengnan_2016	179	oryza_sativa	WRZJ	NA	wild	NA	NA	controlled	NA	NA	95.35	%	60	%	100	NA	NA	124	cm	NA	NA	Shengnan, L., Xiaoling, S., Yanhua, H., Weiming, D., & Sheng, Q. (2016). Fitness of hybrids between two types of transgenic rice and six japonica and indica weed rice accessions. Crop Science, 56(5), 2751–2765. http://doi.org/10.2135/cropsci2015.11.0719
rice	15	Shengnan_2016	180	oryza_sativa	86B	hybrid	domGE	bar	1	controlled	NA	NA	98.55	%	NA	NA	NA	NA	NA	NA	NA	NA	NA	Shengnan, L., Xiaoling, S., Yanhua, H., Weiming, D., & Sheng, Q. (2016). Fitness of hybrids between two types of transgenic rice and six japonica and indica weed rice accessions. Crop Science, 56(5), 2751–2765. http://doi.org/10.2135/cropsci2015.11.0719
rice	15	Shengnan_2016	181	oryza_sativa	WRZQ	NA	wild	NA	NA	controlled	NA	NA	98.44	%	50.86	%	99.4	NA	NA	107.8	NA	NA	NA	Shengnan, L., Xiaoling, S., Yanhua, H., Weiming, D., & Sheng, Q. (2016). Fitness of hybrids between two types of transgenic rice and six japonica and indica weed rice accessions. Crop Science, 56(5), 2751–2765. http://doi.org/10.2135/cropsci2015.11.0719
rice	15	Shengnan_2016	182	oryza_sativa	86B	hybrid	domGE	bar	1	controlled	NA	NA	98.89	%	NA	NA	NA	NA	NA	NA	NA	NA	NA	Shengnan, L., Xiaoling, S., Yanhua, H., Weiming, D., & Sheng, Q. (2016). Fitness of hybrids between two types of transgenic rice and six japonica and indica weed rice accessions. Crop Science, 56(5), 2751–2765. http://doi.org/10.2135/cropsci2015.11.0719
rice	15	Shengnan_2016	183	oryza_sativa	WRZQ	NA	wild	NA	NA	controlled	NA	NA	98.44	%	NA	NA	NA	NA	NA	120.84	cm	NA	NA	Shengnan, L., Xiaoling, S., Yanhua, H., Weiming, D., & Sheng, Q. (2016). Fitness of hybrids between two types of transgenic rice and six japonica and indica weed rice accessions. Crop Science, 56(5), 2751–2765. http://doi.org/10.2135/cropsci2015.11.0719
rice	15	Shengnan_2016	184	oryza_sativa	86B	hybrid	domGE	bar	1	controlled	NA	NA	96.02	%	92	%	96	NA	NA	NA	NA	NA	NA	Shengnan, L., Xiaoling, S., Yanhua, H., Weiming, D., & Sheng, Q. (2016). Fitness of hybrids between two types of transgenic rice and six japonica and indica weed rice accessions. Crop Science, 56(5), 2751–2765. http://doi.org/10.2135/cropsci2015.11.0719
rice	15	Shengnan_2016	185	oryza_sativa	WRZQ	NA	wild	NA	NA	controlled	NA	NA	96.08	%	92	%	106	NA	NA	105.9	cm	NA	NA	Shengnan, L., Xiaoling, S., Yanhua, H., Weiming, D., & Sheng, Q. (2016). Fitness of hybrids between two types of transgenic rice and six japonica and indica weed rice accessions. Crop Science, 56(5), 2751–2765. http://doi.org/10.2135/cropsci2015.11.0719
rice	16	Noldin_2004	186	oryza_sativa	Epagri108xBengal	hybrid	domGE	bar	1	controlled	NA	NA	NA	NA	87.4	%	108.5	NA	NA	144	cm	NA	NA	Noldin, J. A., Yokoyama, S., Stuker, H., Rampelotti, F. T., Goncalves, M. I. F., Eberhardt, D. S., … Vieira, J. (2004). Desempenho de populacoes hibridas F2 de arroz-vermelho (Oryza sativa) com arroz transgenico (O. sativa) resistente ao herbicida Amonio-Glufosinate. Planta Daninha, 22(3), 381–395.
rice	16	Noldin_2004	187	oryza_sativa	Epagri108xBengal	hybrid	domGE	bar	1	controlled	NA	NA	NA	NA	93.8	%	97.9	NA	NA	102.5	cm	NA	NA	Noldin, J. A., Yokoyama, S., Stuker, H., Rampelotti, F. T., Goncalves, M. I. F., Eberhardt, D. S., … Vieira, J. (2004). Desempenho de populacoes hibridas F2 de arroz-vermelho (Oryza sativa) com arroz transgenico (O. sativa) resistente ao herbicida Amonio-Glufosinate. Planta Daninha, 22(3), 381–395.
rice	16	Noldin_2004	188	oryza_sativa	Epagri108xBengal	hybrid	domGE	bar	1	controlled	NA	NA	NA	NA	93.5	%	102.6	NA	NA	148	cm	NA	NA	Noldin, J. A., Yokoyama, S., Stuker, H., Rampelotti, F. T., Goncalves, M. I. F., Eberhardt, D. S., … Vieira, J. (2004). Desempenho de populacoes hibridas F2 de arroz-vermelho (Oryza sativa) com arroz transgenico (O. sativa) resistente ao herbicida Amonio-Glufosinate. Planta Daninha, 22(3), 381–395.
rice	16	Noldin_2004	189	oryza_sativa	Epagri108xBengal	hybrid	domGE	bar	1	controlled	NA	NA	NA	NA	92.6	%	92.5	NA	NA	112	cm	NA	NA	Noldin, J. A., Yokoyama, S., Stuker, H., Rampelotti, F. T., Goncalves, M. I. F., Eberhardt, D. S., … Vieira, J. (2004). Desempenho de populacoes hibridas F2 de arroz-vermelho (Oryza sativa) com arroz transgenico (O. sativa) resistente ao herbicida Amonio-Glufosinate. Planta Daninha, 22(3), 381–395.
rice	16	Noldin_2004	190	oryza_sativa	Bengal	hybrid	domGE	bar	1	controlled	NA	NA	NA	NA	84.3	%	89.4	NA	NA	NA	NA	NA	NA	Noldin, J. A., Yokoyama, S., Stuker, H., Rampelotti, F. T., Goncalves, M. I. F., Eberhardt, D. S., … Vieira, J. (2004). Desempenho de populacoes hibridas F2 de arroz-vermelho (Oryza sativa) com arroz transgenico (O. sativa) resistente ao herbicida Amonio-Glufosinate. Planta Daninha, 22(3), 381–395.
rice	16	Noldin_2004	191	oryza_sativa	preto	NA	wild	NA	NA	controlled	NA	NA	NA	NA	97.9	%	103.3	NA	NA	139	cm	NA	NA	Noldin, J. A., Yokoyama, S., Stuker, H., Rampelotti, F. T., Goncalves, M. I. F., Eberhardt, D. S., … Vieira, J. (2004). Desempenho de populacoes hibridas F2 de arroz-vermelho (Oryza sativa) com arroz transgenico (O. sativa) resistente ao herbicida Amonio-Glufosinate. Planta Daninha, 22(3), 381–395.
rice	16	Noldin_2004	192	oryza_sativa	vermelho	NA	wild	NA	NA	controlled	NA	NA	NA	NA	98	%	96.4	NA	NA	104.7	cm	NA	NA	Noldin, J. A., Yokoyama, S., Stuker, H., Rampelotti, F. T., Goncalves, M. I. F., Eberhardt, D. S., … Vieira, J. (2004). Desempenho de populacoes hibridas F2 de arroz-vermelho (Oryza sativa) com arroz transgenico (O. sativa) resistente ao herbicida Amonio-Glufosinate. Planta Daninha, 22(3), 381–395.
rice	16	Noldin_2004	193	oryza_sativa	Bengal	commercial_line	domGE	bar	1	controlled	NA	NA	NA	NA	85.5	%	90.4	NA	NA	124	cm	NA	NA	Noldin, J. A., Yokoyama, S., Stuker, H., Rampelotti, F. T., Goncalves, M. I. F., Eberhardt, D. S., … Vieira, J. (2004). Desempenho de populacoes hibridas F2 de arroz-vermelho (Oryza sativa) com arroz transgenico (O. sativa) resistente ao herbicida Amonio-Glufosinate. Planta Daninha, 22(3), 381–395.
rice	16	Noldin_2004	194	oryza_sativa	Epagri108	commercial_line	domGE	bar	1	controlled	NA	NA	NA	NA	90.6	%	109.9	NA	NA	140	cm	NA	NA	Noldin, J. A., Yokoyama, S., Stuker, H., Rampelotti, F. T., Goncalves, M. I. F., Eberhardt, D. S., … Vieira, J. (2004). Desempenho de populacoes hibridas F2 de arroz-vermelho (Oryza sativa) com arroz transgenico (O. sativa) resistente ao herbicida Amonio-Glufosinate. Planta Daninha, 22(3), 381–395.
rice	17	Wang_2014	195	oryza_sativa	NA	NA	wild	NA	NA	controlled	NA	NA	NA	NA	50	%	NA	NA	NA	163.4	cm	NA	NA	Wang, W., Xia, H., Yang, X., Xu, T., Si, H. J., Cai, X. X., … Lu, B. R. (2014). A novel 5-enolpyruvoylshikimate-3-phosphate (EPSP) synthase transgene for glyphosate resistance stimulates growth and fecundity in weedy rice (Oryza sativa) without herbicide. New Phytologist, 202(2), 679–688. http://doi.org/10.1111/nph.12428
rice	17	Wang_2014	196	oryza_sativa	Minghui_86	hybrid	domGE	bar	1	controlled	NA	NA	NA	NA	80	%	NA	4.6	total_number	194.37	cm	NA	NA	Wang, W., Xia, H., Yang, X., Xu, T., Si, H. J., Cai, X. X., … Lu, B. R. (2014). A novel 5-enolpyruvoylshikimate-3-phosphate (EPSP) synthase transgene for glyphosate resistance stimulates growth and fecundity in weedy rice (Oryza sativa) without herbicide. New Phytologist, 202(2), 679–688. http://doi.org/10.1111/nph.12428
rice	17	Wang_2014	197	oryza_sativa	NA	NA	wild	NA	NA	controlled	NA	NA	NA	NA	75	%	NA	7.09	total_number	146.3	cm	NA	NA	Wang, W., Xia, H., Yang, X., Xu, T., Si, H. J., Cai, X. X., … Lu, B. R. (2014). A novel 5-enolpyruvoylshikimate-3-phosphate (EPSP) synthase transgene for glyphosate resistance stimulates growth and fecundity in weedy rice (Oryza sativa) without herbicide. New Phytologist, 202(2), 679–688. http://doi.org/10.1111/nph.12428
rice	17	Wang_2014	198	oryza_sativa	Minghui_86	hybrid	domGE	bar	1	controlled	NA	NA	NA	NA	90	%	NA	4.8	total_number	140	cm	NA	NA	Wang, W., Xia, H., Yang, X., Xu, T., Si, H. J., Cai, X. X., … Lu, B. R. (2014). A novel 5-enolpyruvoylshikimate-3-phosphate (EPSP) synthase transgene for glyphosate resistance stimulates growth and fecundity in weedy rice (Oryza sativa) without herbicide. New Phytologist, 202(2), 679–688. http://doi.org/10.1111/nph.12428
rice	17	Wang_2014	199	oryza_sativa	NA	NA	wild	NA	NA	controlled	NA	NA	NA	NA	55	%	NA	NA	NA	108.7	cm	NA	NA	Wang, W., Xia, H., Yang, X., Xu, T., Si, H. J., Cai, X. X., … Lu, B. R. (2014). A novel 5-enolpyruvoylshikimate-3-phosphate (EPSP) synthase transgene for glyphosate resistance stimulates growth and fecundity in weedy rice (Oryza sativa) without herbicide. New Phytologist, 202(2), 679–688. http://doi.org/10.1111/nph.12428
rice	17	Wang_2014	200	oryza_sativa	Minghui_86	hybrid	domGE	bar	1	controlled	NA	NA	NA	NA	95	%	NA	5.2	total_number	166.9	cm	NA	NA	Wang, W., Xia, H., Yang, X., Xu, T., Si, H. J., Cai, X. X., … Lu, B. R. (2014). A novel 5-enolpyruvoylshikimate-3-phosphate (EPSP) synthase transgene for glyphosate resistance stimulates growth and fecundity in weedy rice (Oryza sativa) without herbicide. New Phytologist, 202(2), 679–688. http://doi.org/10.1111/nph.12428
rice	17	Wang_2014	201	oryza_sativa	NA	NA	wild	NA	NA	controlled	NA	NA	NA	NA	78	%	NA	5	total_number	136.1	cm	NA	NA	Wang, W., Xia, H., Yang, X., Xu, T., Si, H. J., Cai, X. X., … Lu, B. R. (2014). A novel 5-enolpyruvoylshikimate-3-phosphate (EPSP) synthase transgene for glyphosate resistance stimulates growth and fecundity in weedy rice (Oryza sativa) without herbicide. New Phytologist, 202(2), 679–688. http://doi.org/10.1111/nph.12428
rice	17	Wang_2014	202	oryza_sativa	Minghui_86	hybrid	domGE	bar	1	controlled	NA	NA	NA	NA	85	%	NA	5.2	total_number	132.4	cm	NA	NA	Wang, W., Xia, H., Yang, X., Xu, T., Si, H. J., Cai, X. X., … Lu, B. R. (2014). A novel 5-enolpyruvoylshikimate-3-phosphate (EPSP) synthase transgene for glyphosate resistance stimulates growth and fecundity in weedy rice (Oryza sativa) without herbicide. New Phytologist, 202(2), 679–688. http://doi.org/10.1111/nph.12428
rice	18	Yang_2007	203	oryza_indica	IR72	hybrid	domNGE	NA	NA	controlled	NA	NA	NA	NA	NA	NA	NA	NA	NA	98	cm	NA	NA	Yang, W., Peng, S., Laza, R. C., Visperas, R. M., & Dionisio-sese, M. L. (2007). Grain Yield and Yield Attributes of New Plant Type and Hybrid Rice. Crop Science, 47, 1393–1400. http://doi.org/10.2135/cropsci2006.07.0457
rice	18	Yang_2007	204	oryza_spp	IR73855H	hybrid	domNGE	NA	NA	controlled	NA	NA	NA	NA	NA	NA	NA	NA	NA	108	cm	NA	NA	Yang, W., Peng, S., Laza, R. C., Visperas, R. M., & Dionisio-sese, M. L. (2007). Grain Yield and Yield Attributes of New Plant Type and Hybrid Rice. Crop Science, 47, 1393–1400. http://doi.org/10.2135/cropsci2006.07.0457
rice	18	Yang_2007	205	oryza_spp	IR71677-161-2-3	hybrid	domGE	npt	5	controlled	NA	NA	NA	NA	NA	NA	NA	NA	NA	110	cm	NA	NA	Yang, W., Peng, S., Laza, R. C., Visperas, R. M., & Dionisio-sese, M. L. (2007). Grain Yield and Yield Attributes of New Plant Type and Hybrid Rice. Crop Science, 47, 1393–1400. http://doi.org/10.2135/cropsci2006.07.0457
rice	18	Yang_2007	206	oryza_indica	IR72	hybrid	domNGE	NA	NA	controlled	NA	NA	NA	NA	NA	NA	NA	NA	NA	11	cm	NA	NA	Yang, W., Peng, S., Laza, R. C., Visperas, R. M., & Dionisio-sese, M. L. (2007). Grain Yield and Yield Attributes of New Plant Type and Hybrid Rice. Crop Science, 47, 1393–1400. http://doi.org/10.2135/cropsci2006.07.0457
rice	18	Yang_2007	207	oryza_spp	IR73855H	hybrid	domNGE	NA	NA	controlled	NA	NA	NA	NA	NA	NA	NA	NA	NA	120	cm	NA	NA	Yang, W., Peng, S., Laza, R. C., Visperas, R. M., & Dionisio-sese, M. L. (2007). Grain Yield and Yield Attributes of New Plant Type and Hybrid Rice. Crop Science, 47, 1393–1400. http://doi.org/10.2135/cropsci2006.07.0457
rice	18	Yang_2007	208	oryza_spp	IR71677-161-2-3	hybrid	domGE	npt	5	controlled	NA	NA	NA	NA	NA	NA	NA	NA	NA	112	cm	NA	NA	Yang, W., Peng, S., Laza, R. C., Visperas, R. M., & Dionisio-sese, M. L. (2007). Grain Yield and Yield Attributes of New Plant Type and Hybrid Rice. Crop Science, 47, 1393–1400. http://doi.org/10.2135/cropsci2006.07.0457
rice	18	Yang_2007	209	oryza_indica	IR72	hybrid	domNGE	NA	NA	controlled	NA	NA	NA	NA	NA	NA	NA	NA	NA	116	cm	NA	NA	Yang, W., Peng, S., Laza, R. C., Visperas, R. M., & Dionisio-sese, M. L. (2007). Grain Yield and Yield Attributes of New Plant Type and Hybrid Rice. Crop Science, 47, 1393–1400. http://doi.org/10.2135/cropsci2006.07.0457
rice	18	Yang_2007	210	oryza_spp	IR73855H	hybrid	domNGE	NA	NA	controlled	NA	NA	NA	NA	NA	NA	NA	NA	NA	123	cm	NA	NA	Yang, W., Peng, S., Laza, R. C., Visperas, R. M., & Dionisio-sese, M. L. (2007). Grain Yield and Yield Attributes of New Plant Type and Hybrid Rice. Crop Science, 47, 1393–1400. http://doi.org/10.2135/cropsci2006.07.0457
rice	18	Yang_2007	211	oryza_spp	IR71677-161-2-3	hybrid	domGE	npt	5	controlled	NA	NA	NA	NA	NA	NA	NA	NA	NA	130	cm	NA	NA	Yang, W., Peng, S., Laza, R. C., Visperas, R. M., & Dionisio-sese, M. L. (2007). Grain Yield and Yield Attributes of New Plant Type and Hybrid Rice. Crop Science, 47, 1393–1400. http://doi.org/10.2135/cropsci2006.07.0457
rice	18	Yang_2007	212	oryza_indica	IR72	hybrid	domNGE	NA	NA	controlled	NA	NA	NA	NA	NA	NA	NA	NA	NA	112	cm	NA	NA	Yang, W., Peng, S., Laza, R. C., Visperas, R. M., & Dionisio-sese, M. L. (2007). Grain Yield and Yield Attributes of New Plant Type and Hybrid Rice. Crop Science, 47, 1393–1400. http://doi.org/10.2135/cropsci2006.07.0457
rice	18	Yang_2007	213	oryza_spp	IR73855H	hybrid	domNGE	NA	NA	controlled	NA	NA	NA	NA	NA	NA	NA	NA	NA	117	cm	NA	NA	Yang, W., Peng, S., Laza, R. C., Visperas, R. M., & Dionisio-sese, M. L. (2007). Grain Yield and Yield Attributes of New Plant Type and Hybrid Rice. Crop Science, 47, 1393–1400. http://doi.org/10.2135/cropsci2006.07.0457
rice	18	Yang_2007	214	oryza_spp	IR71677-161-2-3	hybrid	domGE	npt	5	controlled	NA	NA	NA	NA	NA	NA	NA	NA	NA	120	cm	NA	NA	Yang, W., Peng, S., Laza, R. C., Visperas, R. M., & Dionisio-sese, M. L. (2007). Grain Yield and Yield Attributes of New Plant Type and Hybrid Rice. Crop Science, 47, 1393–1400. http://doi.org/10.2135/cropsci2006.07.0457
rice	19	Yoshida_1972	215	oryza_spp	IR154-45-11	commercial_line	domNGE	NA	NA	controlled	NA	NA	NA	NA	NA	NA	NA	NA	NA	103	cm	NA	NA	Yoshida, S., & Parao, F. T. (1972). PERFORMANCE OF IMPROVED RICE VARIETIES IN THE TROPICS WITIT SPECIAL REFERENCE TO TILLERING CAPACITY. Experimental Agriculture, 8, 203–212.
rice	19	Yoshida_1972	216	oryza_spp	IR165-34-2	commercial_line	domNGE	NA	NA	controlled	NA	NA	NA	NA	NA	NA	NA	NA	NA	98	cm	NA	NA	Yoshida, S., & Parao, F. T. (1972). PERFORMANCE OF IMPROVED RICE VARIETIES IN THE TROPICS WITIT SPECIAL REFERENCE TO TILLERING CAPACITY. Experimental Agriculture, 8, 203–212.
rice	19	Yoshida_1972	217	oryza_spp	IR154-68-3	commercial_line	domNGE	NA	NA	controlled	NA	NA	NA	NA	NA	NA	NA	NA	NA	99	cm	NA	NA	Yoshida, S., & Parao, F. T. (1972). PERFORMANCE OF IMPROVED RICE VARIETIES IN THE TROPICS WITIT SPECIAL REFERENCE TO TILLERING CAPACITY. Experimental Agriculture, 8, 203–212.
rice	19	Yoshida_1972	218	oryza_spp	IR154-30-3	commercial_line	domNGE	NA	NA	controlled	NA	NA	NA	NA	NA	NA	NA	NA	NA	98	cm	NA	NA	Yoshida, S., & Parao, F. T. (1972). PERFORMANCE OF IMPROVED RICE VARIETIES IN THE TROPICS WITIT SPECIAL REFERENCE TO TILLERING CAPACITY. Experimental Agriculture, 8, 203–212.
rice	19	Yoshida_1972	219	oryza_spp	IR8	commercial_line	domNGE	NA	NA	controlled	NA	NA	NA	NA	NA	NA	NA	NA	NA	106	cm	NA	NA	Yoshida, S., & Parao, F. T. (1972). PERFORMANCE OF IMPROVED RICE VARIETIES IN THE TROPICS WITIT SPECIAL REFERENCE TO TILLERING CAPACITY. Experimental Agriculture, 8, 203–212.
rice	19	Yoshida_1972	220	oryza_spp	IR154-18-2	commercial_line	domNGE	NA	NA	controlled	NA	NA	NA	NA	NA	NA	NA	NA	NA	104	cm	NA	NA	Yoshida, S., & Parao, F. T. (1972). PERFORMANCE OF IMPROVED RICE VARIETIES IN THE TROPICS WITIT SPECIAL REFERENCE TO TILLERING CAPACITY. Experimental Agriculture, 8, 203–212.
canola	20	Baranger_etal_1995	221	brassica_napus	Brutor	hybrid	domNGE	NA	NA	controlled	10400	total_number	75.71	%	NA	NA	NA	NA	NA	NA	NA	NA	NA	Baranger, A., Chevre, A. M., Eber, F., & Renard, M. (1995). Effect of oilseed rape genotype on the spontaneous hybridization rate with a weedy species : an assessment of transgene dispersal. Theor Appl Genetics, 91, 956–963.
canola	20	Baranger_etal_1995	222	brassica_napus	Drakkar	hybrid	domNGE	NA	NA	controlled	64900	total_number	NA	NA	NA	NA	NA	NA	NA	NA	NA	NA	NA	Baranger, A., Chevre, A. M., Eber, F., & Renard, M. (1995). Effect of oilseed rape genotype on the spontaneous hybridization rate with a weedy species : an assessment of transgene dispersal. Theor Appl Genetics, 91, 956–963.
canola	20	Baranger_etal_1995	223	brassica_napus	Miyuki	hybrid	domNGE	NA	NA	controlled	3600	total_number	92	%	NA	NA	NA	NA	NA	NA	NA	NA	NA	Baranger, A., Chevre, A. M., Eber, F., & Renard, M. (1995). Effect of oilseed rape genotype on the spontaneous hybridization rate with a weedy species : an assessment of transgene dispersal. Theor Appl Genetics, 91, 956–963.
canola	20	Baranger_etal_1995	224	brassica_napus	Samourai	hybrid	domNGE	NA	NA	controlled	49600	total_number	8.1	%	NA	NA	NA	NA	NA	NA	NA	NA	NA	Baranger, A., Chevre, A. M., Eber, F., & Renard, M. (1995). Effect of oilseed rape genotype on the spontaneous hybridization rate with a weedy species : an assessment of transgene dispersal. Theor Appl Genetics, 91, 956–963.
canola	20	Baranger_etal_1995	225	brassica_napus	Hobson	hybrid	domNGE	NA	NA	controlled	40900	total_number	15.33	%	NA	NA	NA	NA	NA	NA	NA	NA	NA	Baranger, A., Chevre, A. M., Eber, F., & Renard, M. (1995). Effect of oilseed rape genotype on the spontaneous hybridization rate with a weedy species : an assessment of transgene dispersal. Theor Appl Genetics, 91, 956–963.
canola	20	Baranger_etal_1995	226	brassica_napus	Brutor_W	hybrid	domGE	bar	1	controlled	58800	total_number	5.75	%	74.4	%	NA	NA	NA	NA	NA	NA	NA	Baranger, A., Chevre, A. M., Eber, F., & Renard, M. (1995). Effect of oilseed rape genotype on the spontaneous hybridization rate with a weedy species : an assessment of transgene dispersal. Theor Appl Genetics, 91, 956–963.
canola	20	Baranger_etal_1995	227	brassica_napus	Drakkar_W	hybrid	domGE	bar	1	controlled	70300	total_number	NA	NA	NA	NA	NA	NA	NA	NA	NA	NA	NA	Baranger, A., Chevre, A. M., Eber, F., & Renard, M. (1995). Effect of oilseed rape genotype on the spontaneous hybridization rate with a weedy species : an assessment of transgene dispersal. Theor Appl Genetics, 91, 956–963.
canola	20	Baranger_etal_1995	228	brassica_napus	Miyuki_W	hybrid	domGE	bar	1	controlled	113800	total_number	NA	NA	NA	NA	NA	NA	NA	NA	NA	NA	NA	Baranger, A., Chevre, A. M., Eber, F., & Renard, M. (1995). Effect of oilseed rape genotype on the spontaneous hybridization rate with a weedy species : an assessment of transgene dispersal. Theor Appl Genetics, 91, 956–963.
canola	20	Baranger_etal_1995	229	brassica_napus	Samourai_W	hybrid	domGE	bar	1	controlled	116700	total_number	NA	NA	NA	NA	NA	NA	NA	NA	NA	NA	NA	Baranger, A., Chevre, A. M., Eber, F., & Renard, M. (1995). Effect of oilseed rape genotype on the spontaneous hybridization rate with a weedy species : an assessment of transgene dispersal. Theor Appl Genetics, 91, 956–963.
canola	20	Baranger_etal_1995	230	brassica_napus	Hobson_W	hybrid	domGE	bar	1	controlled	122300	total_number	NA	NA	NA	NA	NA	NA	NA	NA	NA	NA	NA	Baranger, A., Chevre, A. M., Eber, F., & Renard, M. (1995). Effect of oilseed rape genotype on the spontaneous hybridization rate with a weedy species : an assessment of transgene dispersal. Theor Appl Genetics, 91, 956–963.
canola	21	Chevre_etal_1998	231	brassica_napus	Miyuki	hybrid	domNGE	NA	NA	controlled	800	seeds_100fl	NA	NA	NA	NA	53	NA	NA	NA	NA	NA	NA	Chevre, A. M., Eber, F., Baranger, A., Hureau, G., Barret, P., Picault, H., & Renard, M. (1998). Characterization of backcross generations obtained under field conditions from oilseed rape-wild radish F 1 interspecific hybrids : an assessment of transgene dispersal. Theor Appl Genetics, 97, 90–98.
canola	21	Chevre_etal_1998	232	brassica_napus	Drakkar	hybrid	domNGE	NA	NA	controlled	470	seeds_100fl	NA	NA	NA	NA	75.4	NA	NA	70.7	cm	NA	NA	Chevre, A. M., Eber, F., Baranger, A., Hureau, G., Barret, P., Picault, H., & Renard, M. (1998). Characterization of backcross generations obtained under field conditions from oilseed rape-wild radish F 1 interspecific hybrids : an assessment of transgene dispersal. Theor Appl Genetics, 97, 90–98.
canola	21	Chevre_etal_1998	233	brassica_napus	Samourai	hybrid	domNGE	NA	NA	controlled	250	total_number	13	%	NA	NA	NA	NA	NA	NA	NA	NA	NA	Chevre, A. M., Eber, F., Baranger, A., Hureau, G., Barret, P., Picault, H., & Renard, M. (1998). Characterization of backcross generations obtained under field conditions from oilseed rape-wild radish F 1 interspecific hybrids : an assessment of transgene dispersal. Theor Appl Genetics, 97, 90–98.
canola	21	Chevre_etal_1998	234	brassica_napus	Miyuki_W	hybrid	domGE	bar	1	controlled	840	total_number	NA	NA	NA	NA	NA	NA	NA	NA	NA	NA	NA	Chevre, A. M., Eber, F., Baranger, A., Hureau, G., Barret, P., Picault, H., & Renard, M. (1998). Characterization of backcross generations obtained under field conditions from oilseed rape-wild radish F 1 interspecific hybrids : an assessment of transgene dispersal. Theor Appl Genetics, 97, 90–98.
canola	21	Chevre_etal_1998	235	brassica_napus	Drakkar_W	hybrid	domGE	bar	1	controlled	420	seeds_100fl	NA	NA	NA	NA	84.7	NA	NA	18.2	cm	NA	NA	Chevre, A. M., Eber, F., Baranger, A., Hureau, G., Barret, P., Picault, H., & Renard, M. (1998). Characterization of backcross generations obtained under field conditions from oilseed rape-wild radish F 1 interspecific hybrids : an assessment of transgene dispersal. Theor Appl Genetics, 97, 90–98.
canola	21	Chevre_etal_1998	236	brassica_napus	Samourai_W	hybrid	domGE	bar	1	controlled	1090	total_number	NA	NA	50	%	NA	NA	NA	NA	NA	NA	NA	Chevre, A. M., Eber, F., Baranger, A., Hureau, G., Barret, P., Picault, H., & Renard, M. (1998). Characterization of backcross generations obtained under field conditions from oilseed rape-wild radish F 1 interspecific hybrids : an assessment of transgene dispersal. Theor Appl Genetics, 97, 90–98.
canola	22	Crawley_1993	237	brassica_napus	NA	hybrid	domNGE	NA	NA	controlled	7453	total_number	NA	NA	NA	NA	NA	NA	NA	NA	NA	NA	NA	Crawley, M. J., Hails, R. S., Rees, M., Kohn, D., & Buxton, J. (1993). Ecology of transgenic oilseed rape in natural habitats. Letter to Nature, 363.
canola	22	Crawley_1993	238	brassica_napus	Westar_T5	commercial_line	domGE	bar	1	controlled	15641	total_number	4.82	%	98.7	%	NA	NA	NA	NA	NA	NA	NA	Crawley, M. J., Hails, R. S., Rees, M., Kohn, D., & Buxton, J. (1993). Ecology of transgenic oilseed rape in natural habitats. Letter to Nature, 363.
canola	22	Crawley_1993	239	brassica_napus	NA	hybrid	domNGE	NA	NA	controlled	19	seeds_100fl	9.7	%	NA	NA	NA	NA	NA	NA	NA	NA	NA	Crawley, M. J., Hails, R. S., Rees, M., Kohn, D., & Buxton, J. (1993). Ecology of transgenic oilseed rape in natural habitats. Letter to Nature, 363.
canola	22	Crawley_1993	240	brassica_napus	Westar_T5	commercial_line	domGE	bar	1	controlled	30	seeds_100fl	NA	NA	NA	NA	93.5	NA	NA	15.5	cm	NA	NA	Crawley, M. J., Hails, R. S., Rees, M., Kohn, D., & Buxton, J. (1993). Ecology of transgenic oilseed rape in natural habitats. Letter to Nature, 363.
canola	22	Crawley_1993	241	brassica_napus	NA	hybrid	domNGE	NA	NA	controlled	NA	NA	NA	NA	77.6	%	NA	NA	NA	NA	NA	NA	NA	Crawley, M. J., Hails, R. S., Rees, M., Kohn, D., & Buxton, J. (1993). Ecology of transgenic oilseed rape in natural habitats. Letter to Nature, 363.
canola	22	Crawley_1993	242	brassica_napus	Westar_T5	commercial_line	domGE	bar	1	controlled	NA	NA	NA	NA	NA	NA	NA	NA	NA	NA	NA	NA	NA	Crawley, M. J., Hails, R. S., Rees, M., Kohn, D., & Buxton, J. (1993). Ecology of transgenic oilseed rape in natural habitats. Letter to Nature, 363.
canola	22	Crawley_1993	243	brassica_napus	NA	hybrid	domNGE	NA	NA	controlled	NA	NA	NA	NA	14.9	%	NA	NA	NA	NA	NA	NA	NA	Crawley, M. J., Hails, R. S., Rees, M., Kohn, D., & Buxton, J. (1993). Ecology of transgenic oilseed rape in natural habitats. Letter to Nature, 363.
canola	22	Crawley_1993	244	brassica_napus	Westar_T5	commercial_line	domGE	bar	1	controlled	NA	NA	NA	NA	78.2	%	NA	NA	NA	NA	NA	NA	NA	Crawley, M. J., Hails, R. S., Rees, M., Kohn, D., & Buxton, J. (1993). Ecology of transgenic oilseed rape in natural habitats. Letter to Nature, 363.
canola	22	Crawley_1993	245	brassica_napus	NA	hybrid	domNGE	NA	NA	controlled	NA	NA	NA	NA	NA	NA	NA	847.9	total_number	NA	NA	NA	NA	Crawley, M. J., Hails, R. S., Rees, M., Kohn, D., & Buxton, J. (1993). Ecology of transgenic oilseed rape in natural habitats. Letter to Nature, 363.
canola	22	Crawley_1993	246	brassica_napus	Westar_T5	commercial_line	domGE	bar	1	controlled	NA	NA	95	%	NA	NA	NA	NA	NA	NA	NA	NA	NA	Crawley, M. J., Hails, R. S., Rees, M., Kohn, D., & Buxton, J. (1993). Ecology of transgenic oilseed rape in natural habitats. Letter to Nature, 363.
canola	22	Crawley_1993	247	brassica_napus	NA	hybrid	domNGE	NA	NA	controlled	NA	NA	92	%	NA	NA	NA	NA	NA	NA	NA	NA	NA	Crawley, M. J., Hails, R. S., Rees, M., Kohn, D., & Buxton, J. (1993). Ecology of transgenic oilseed rape in natural habitats. Letter to Nature, 363.
canola	22	Crawley_1993	248	brassica_napus	Westar_T5	commercial_line	domGE	bar	1	controlled	NA	NA	NA	NA	NA	NA	NA	1740	total_number	NA	NA	NA	NA	Crawley, M. J., Hails, R. S., Rees, M., Kohn, D., & Buxton, J. (1993). Ecology of transgenic oilseed rape in natural habitats. Letter to Nature, 363.
canola	22	Crawley_1993	249	brassica_napus	NA	hybrid	domNGE	NA	NA	controlled	285	total_number	NA	NA	NA	NA	NA	NA	NA	NA	NA	NA	NA	Crawley, M. J., Hails, R. S., Rees, M., Kohn, D., & Buxton, J. (1993). Ecology of transgenic oilseed rape in natural habitats. Letter to Nature, 363.
canola	22	Crawley_1993	250	brassica_napus	Westar_T5	commercial_line	domGE	bar	1	controlled	599	total_number	NA	NA	NA	NA	NA	NA	NA	NA	NA	NA	NA	Crawley, M. J., Hails, R. S., Rees, M., Kohn, D., & Buxton, J. (1993). Ecology of transgenic oilseed rape in natural habitats. Letter to Nature, 363.
canola	22	Crawley_1993	251	brassica_napus	NA	hybrid	domNGE	NA	NA	controlled	4983	total_number	NA	NA	NA	NA	NA	NA	NA	NA	NA	NA	NA	Crawley, M. J., Hails, R. S., Rees, M., Kohn, D., & Buxton, J. (1993). Ecology of transgenic oilseed rape in natural habitats. Letter to Nature, 363.
canola	22	Crawley_1993	252	brassica_napus	Westar_T5	commercial_line	domGE	bar	1	controlled	NA	NA	NA	NA	95	%	NA	NA	NA	NA	NA	NA	NA	Crawley, M. J., Hails, R. S., Rees, M., Kohn, D., & Buxton, J. (1993). Ecology of transgenic oilseed rape in natural habitats. Letter to Nature, 363.
canola	22	Crawley_1993	253	brassica_napus	NA	hybrid	domNGE	NA	NA	controlled	NA	NA	NA	NA	92.1	%	NA	NA	NA	NA	NA	NA	NA	Crawley, M. J., Hails, R. S., Rees, M., Kohn, D., & Buxton, J. (1993). Ecology of transgenic oilseed rape in natural habitats. Letter to Nature, 363.
canola	22	Crawley_1993	254	brassica_napus	Westar_T5	commercial_line	domGE	bar	1	controlled	17	total_number	8.1	%	NA	NA	NA	NA	NA	NA	NA	NA	NA	Crawley, M. J., Hails, R. S., Rees, M., Kohn, D., & Buxton, J. (1993). Ecology of transgenic oilseed rape in natural habitats. Letter to Nature, 363.
canola	22	Crawley_1993	255	brassica_napus	NA	hybrid	domNGE	NA	NA	controlled	NA	NA	NA	NA	59.3	%	NA	NA	NA	NA	NA	NA	NA	Crawley, M. J., Hails, R. S., Rees, M., Kohn, D., & Buxton, J. (1993). Ecology of transgenic oilseed rape in natural habitats. Letter to Nature, 363.
canola	22	Crawley_1993	256	brassica_napus	Westar_T5	commercial_line	domGE	bar	1	controlled	10	total_number	5.7	%	94.4	%	NA	NA	NA	NA	NA	NA	NA	Crawley, M. J., Hails, R. S., Rees, M., Kohn, D., & Buxton, J. (1993). Ecology of transgenic oilseed rape in natural habitats. Letter to Nature, 363.
canola	22	Crawley_1993	257	brassica_napus	NA	hybrid	domNGE	NA	NA	controlled	5879	total_number	NA	NA	NA	NA	NA	NA	NA	NA	NA	NA	NA	Crawley, M. J., Hails, R. S., Rees, M., Kohn, D., & Buxton, J. (1993). Ecology of transgenic oilseed rape in natural habitats. Letter to Nature, 363.
canola	22	Crawley_1993	258	brassica_napus	Westar_T5	commercial_line	domGE	bar	1	controlled	4373	total_number	91.5	%	NA	NA	NA	NA	NA	NA	NA	NA	NA	Crawley, M. J., Hails, R. S., Rees, M., Kohn, D., & Buxton, J. (1993). Ecology of transgenic oilseed rape in natural habitats. Letter to Nature, 363.
canola	22	Crawley_1993	259	brassica_napus	NA	hybrid	domNGE	NA	NA	controlled	497	total_number	NA	NA	NA	NA	NA	NA	NA	NA	NA	NA	NA	Crawley, M. J., Hails, R. S., Rees, M., Kohn, D., & Buxton, J. (1993). Ecology of transgenic oilseed rape in natural habitats. Letter to Nature, 363.
canola	22	Crawley_1993	260	brassica_napus	Westar_T5	commercial_line	domGE	bar	1	controlled	302	total_number	NA	NA	NA	NA	NA	NA	NA	NA	NA	NA	NA	Crawley, M. J., Hails, R. S., Rees, M., Kohn, D., & Buxton, J. (1993). Ecology of transgenic oilseed rape in natural habitats. Letter to Nature, 363.
canola	23	Gueritaine_2002	261	brassica_napus	Drakkar_W	hybrid	domNGE	NA	NA	controlled	14.5	total_number	4.3	%	96.1	%	NA	NA	NA	NA	NA	NA	NA	Gueritaine, G., Sester, M., Eber, F., Chevre, A. M., & Darmency, H. (2002). Fitness of backcross six of hybrids between transgenic oilseed rape (Brassica napus) and wild radish (Raphanus raphanistrum). Molecular Ecology, 11, 1419–1426.
canola	23	Gueritaine_2002	262	brassica_napus	Drakkar_W	hybrid	domGE	bar	1	controlled	99.2	total_number	NA	NA	50	%	NA	NA	NA	NA	NA	NA	NA	Gueritaine, G., Sester, M., Eber, F., Chevre, A. M., & Darmency, H. (2002). Fitness of backcross six of hybrids between transgenic oilseed rape (Brassica napus) and wild radish (Raphanus raphanistrum). Molecular Ecology, 11, 1419–1426.
canola	23	Gueritaine_2002	263	brassica_napus	Radish_W	hybrid	domNGE	NA	NA	controlled	582.1	total_number	NA	NA	NA	NA	NA	NA	NA	NA	NA	NA	NA	Gueritaine, G., Sester, M., Eber, F., Chevre, A. M., & Darmency, H. (2002). Fitness of backcross six of hybrids between transgenic oilseed rape (Brassica napus) and wild radish (Raphanus raphanistrum). Molecular Ecology, 11, 1419–1426.
canola	23	Gueritaine_2002	264	brassica_napus	Radish_W	hybrid	domGE	bar	1	controlled	356.4	total_number	NA	NA	NA	NA	NA	NA	NA	NA	NA	NA	NA	Gueritaine, G., Sester, M., Eber, F., Chevre, A. M., & Darmency, H. (2002). Fitness of backcross six of hybrids between transgenic oilseed rape (Brassica napus) and wild radish (Raphanus raphanistrum). Molecular Ecology, 11, 1419–1426.
canola	24	Hauser_1998	265	brassica_rapa	NA	NA	wild	NA	NA	controlled	962.5	total_number	37.8	%	NA	NA	NA	NA	NA	NA	NA	NA	NA	Hauser, T. P., Jorgensen, R. B., & Ostergard, H. (1998). Fitness of backcross and F2 hybrids between weedy Brassica rapa and oilseed rape (B.napus). Heredity, 81, 436–443.
canola	24	Hauser_1998	266	brassica_spp	NA	hybrid	domNGE	NA	NA	controlled	3597.7	total_number	NA	NA	NA	NA	NA	NA	NA	NA	NA	NA	NA	Hauser, T. P., Jorgensen, R. B., & Ostergard, H. (1998). Fitness of backcross and F2 hybrids between weedy Brassica rapa and oilseed rape (B.napus). Heredity, 81, 436–443.
canola	24	Hauser_1998	267	brassica_spp	NA	hybrid	domNGE	NA	NA	controlled	3344.2	total_number	NA	NA	NA	NA	NA	NA	NA	NA	NA	NA	NA	Hauser, T. P., Jorgensen, R. B., & Ostergard, H. (1998). Fitness of backcross and F2 hybrids between weedy Brassica rapa and oilseed rape (B.napus). Heredity, 81, 436–443.
canola	24	Hauser_1998	268	brassica_napus	Drakkar	commercial_line	domNGE	NA	NA	controlled	8308.2	total_number	85.55	%	NA	NA	NA	NA	NA	NA	NA	NA	NA	Hauser, T. P., Jorgensen, R. B., & Ostergard, H. (1998). Fitness of backcross and F2 hybrids between weedy Brassica rapa and oilseed rape (B.napus). Heredity, 81, 436–443.
canola	25	Hauser_1998a	269	brassica_rapa	NA	NA	wild	NA	NA	controlled	4347	total_number	97.6	%	NA	NA	NA	NA	NA	NA	NA	NA	NA	Hauser, T. P., Shaw, R. G., & Ostergards, H. (1998). Fitness of F 1 hybrids between weedy Brassica rapa and oilseed rape ( B . napus ). Heredity, 81, 429–435.
canola	25	Hauser_1998a	270	brassica_rapa	NA	hybrid	domNGE	NA	NA	controlled	1300	total_number	NA	NA	NA	NA	163	1235	total_number	100.9	cm	NA	NA	Hauser, T. P., Shaw, R. G., & Ostergards, H. (1998). Fitness of F 1 hybrids between weedy Brassica rapa and oilseed rape ( B . napus ). Heredity, 81, 429–435.
canola	25	Hauser_1998a	271	brassica_rapa	NA	hybrid	domNGE	NA	NA	controlled	1007	total_number	49.6	%	NA	NA	NA	NA	NA	NA	NA	NA	NA	Hauser, T. P., Shaw, R. G., & Ostergards, H. (1998). Fitness of F 1 hybrids between weedy Brassica rapa and oilseed rape ( B . napus ). Heredity, 81, 429–435.
canola	25	Hauser_1998a	272	brassica_spp	NA	hybrid	domNGE	NA	NA	controlled	943	total_number	43.3	%	NA	NA	NA	NA	NA	NA	NA	NA	NA	Hauser, T. P., Shaw, R. G., & Ostergards, H. (1998). Fitness of F 1 hybrids between weedy Brassica rapa and oilseed rape ( B . napus ). Heredity, 81, 429–435.
canola	25	Hauser_1998a	273	brassica_napus	NA	hybrid	domNGE	NA	NA	controlled	3400	total_number	NA	NA	NA	NA	NA	NA	NA	NA	NA	NA	NA	Hauser, T. P., Shaw, R. G., & Ostergards, H. (1998). Fitness of F 1 hybrids between weedy Brassica rapa and oilseed rape ( B . napus ). Heredity, 81, 429–435.
canola	25	Hauser_1998a	274	brassica_napus	NA	hybrid	domNGE	NA	NA	controlled	4723	total_number	98.9	%	NA	NA	NA	NA	NA	NA	NA	NA	NA	Hauser, T. P., Shaw, R. G., & Ostergards, H. (1998). Fitness of F 1 hybrids between weedy Brassica rapa and oilseed rape ( B . napus ). Heredity, 81, 429–435.
canola	25	Hauser_1998a	275	brassica_napus	NA	NA	wild	NA	NA	controlled	7415	total_number	NA	NA	45	%	NA	NA	NA	NA	NA	NA	NA	Hauser, T. P., Shaw, R. G., & Ostergards, H. (1998). Fitness of F 1 hybrids between weedy Brassica rapa and oilseed rape ( B . napus ). Heredity, 81, 429–435.
canola	26	Lefol_1995	276	brassica_spp	NA	NA	wild	NA	NA	controlled	NA	NA	10	%	NA	NA	NA	NA	NA	NA	NA	NA	NA	Lefol, E., Danielou, V., Darmency, H., Boucher, F., Mailet, J., & Renard, M. (1995). Gene dispersal from transgenic crops. I. Growth of interspecific hybrids between oilseed rape and the wild hoary mustard. Journal of Aplied Ecology, 32, 803–808.
canola	26	Lefol_1995	277	brassica_napus	Samourai	hybrid	domNGE	NA	NA	controlled	NA	NA	7	%	NA	NA	NA	NA	NA	53.6	cm	NA	NA	Lefol, E., Danielou, V., Darmency, H., Boucher, F., Mailet, J., & Renard, M. (1995). Gene dispersal from transgenic crops. I. Growth of interspecific hybrids between oilseed rape and the wild hoary mustard. Journal of Aplied Ecology, 32, 803–808.
canola	27	Londo_2010	278	brassica_napus	RaideRR	commercial_line	domGE	cp4epsps	1	controlled	4320	total_number	98.9	%	NA	NA	NA	NA	NA	NA	NA	NA	NA	Londo, J. P., Bautista, N. S., Sagers, C. L., Lee, E. H., & Watrud, L. S. (2010). Glyphosate drift promotes changes in fitness and transgene gene flow in canola (Brassica napus) and hybrids. Annals of Botany, 106, 957–965. http://doi.org/10.1093/aob/mcq190
canola	27	Londo_2010	279	brassica_rapa	NA	NA	wild	NA	NA	controlled	2310	total_number	91	%	NA	NA	NA	NA	NA	NA	NA	NA	NA	Londo, J. P., Bautista, N. S., Sagers, C. L., Lee, E. H., & Watrud, L. S. (2010). Glyphosate drift promotes changes in fitness and transgene gene flow in canola (Brassica napus) and hybrids. Annals of Botany, 106, 957–965. http://doi.org/10.1093/aob/mcq190
canola	27	Londo_2010	280	brassica_spp	NA	hybrid	domNGE	NA	NA	controlled	1000	total_number	47.8	%	NA	NA	NA	NA	NA	NA	NA	NA	NA	Londo, J. P., Bautista, N. S., Sagers, C. L., Lee, E. H., & Watrud, L. S. (2010). Glyphosate drift promotes changes in fitness and transgene gene flow in canola (Brassica napus) and hybrids. Annals of Botany, 106, 957–965. http://doi.org/10.1093/aob/mcq190
canola	27	Londo_2010	281	brassica_rapa	NA	hybrid	domGE	cp4epsps	1	controlled	24.3	total_number	13.4	%	NA	NA	NA	NA	NA	NA	NA	NA	NA	Londo, J. P., Bautista, N. S., Sagers, C. L., Lee, E. H., & Watrud, L. S. (2010). Glyphosate drift promotes changes in fitness and transgene gene flow in canola (Brassica napus) and hybrids. Annals of Botany, 106, 957–965. http://doi.org/10.1093/aob/mcq190
canola	27	Londo_2010	282	brassica_rapa	NA	hybrid	domNGE	NA	1	controlled	59.4	seeds_100fl	NA	NA	NA	NA	83.4	NA	NA	75.3	cm	NA	NA	Londo, J. P., Bautista, N. S., Sagers, C. L., Lee, E. H., & Watrud, L. S. (2010). Glyphosate drift promotes changes in fitness and transgene gene flow in canola (Brassica napus) and hybrids. Annals of Botany, 106, 957–965. http://doi.org/10.1093/aob/mcq190
canola	27	Londo_2010	283	brassica_napus	NA	hybrid	domGE	cp4epsps	1	controlled	756	total_number	NA	NA	NA	NA	NA	NA	NA	NA	NA	NA	NA	Londo, J. P., Bautista, N. S., Sagers, C. L., Lee, E. H., & Watrud, L. S. (2010). Glyphosate drift promotes changes in fitness and transgene gene flow in canola (Brassica napus) and hybrids. Annals of Botany, 106, 957–965. http://doi.org/10.1093/aob/mcq190
canola	28	Pertl_2002	284	brassica_napus	Drakkar	commercial_line	domNGE	NA	NA	controlled	666	total_number	70	%	NA	NA	NA	NA	NA	NA	NA	NA	NA	Pertl, M., Hauser, T. P., Damgaard, C., & Jørgensen, R. B. (2002). Male fitness of oilseed rape (Brassica napus), weedy B. rapa and their F 1 hybrids when pollinating B. rapa seeds. Heredity, 89, 212–218. http://doi.org/10.1038/sj.hdy.6800131
canola	28	Pertl_2002	285	brassica_rapa	Br45	NA	wild	NA	NA	controlled	202	total_number	NA	NA	58	%	NA	149	total_number	NA	NA	NA	NA	Pertl, M., Hauser, T. P., Damgaard, C., & Jørgensen, R. B. (2002). Male fitness of oilseed rape (Brassica napus), weedy B. rapa and their F 1 hybrids when pollinating B. rapa seeds. Heredity, 89, 212–218. http://doi.org/10.1038/sj.hdy.6800131
canola	28	Pertl_2002	286	brassica_spp	DrakkarGM_Br25	hybrid	domGE	glufosinant_tolerant	1	controlled	1195	total_number	NA	NA	NA	NA	163	1080	total_number	94.3	cm	NA	NA	Pertl, M., Hauser, T. P., Damgaard, C., & Jørgensen, R. B. (2002). Male fitness of oilseed rape (Brassica napus), weedy B. rapa and their F 1 hybrids when pollinating B. rapa seeds. Heredity, 89, 212–218. http://doi.org/10.1038/sj.hdy.6800131
canola	29	Vacher_2004	287	brassica_rapa	NA	NA	wild	NA	NA	controlled	NA	NA	NA	NA	NA	NA	55	NA	NA	NA	NA	NA	NA	Vacher, C., Weis, A. E., Hermann, D., Kossler, T., Young, C., & Hochberg, M. E. (2004). Impact of ecological factors on the initial invasion of Bt transgenes into wild populations of birdseed rape (Brassica rapa). Theor Appl Genetics, 109, 806–814. http://doi.org/10.1007/s00122-004-1696-7
canola	29	Vacher_2004	288	brassica_napus	NA	hybrid	domGE	cry1ac	2	controlled	NA	NA	11.1	%	NA	NA	NA	NA	NA	NA	NA	NA	NA	Vacher, C., Weis, A. E., Hermann, D., Kossler, T., Young, C., & Hochberg, M. E. (2004). Impact of ecological factors on the initial invasion of Bt transgenes into wild populations of birdseed rape (Brassica rapa). Theor Appl Genetics, 109, 806–814. http://doi.org/10.1007/s00122-004-1696-7
canola	30	Lefol_1996	289	brassica_napus	Samourai	commercial_line	domNGE	NA	NA	controlled	NA	NA	NA	NA	NA	NA	17	NA	NA	NA	NA	NA	NA	Lefol, E., Danielou, V., & Darmency, H. (1996). Predicting hybridization between transgenic oilseed rape and wild mustard. Field Crops Research, 45, 153–161. http://doi.org/10.1016/0378-4290(95)00067-4
canola	30	Lefol_1996	290	brassica_napus	Ceres	commercial_line	domNGE	NA	NA	controlled	NA	NA	NA	NA	NA	NA	34.7	NA	NA	NA	NA	NA	NA	Lefol, E., Danielou, V., & Darmency, H. (1996). Predicting hybridization between transgenic oilseed rape and wild mustard. Field Crops Research, 45, 153–161. http://doi.org/10.1016/0378-4290(95)00067-4
canola	30	Lefol_1996	291	brassica_napus	Darmor	commercial_line	domNGE	NA	NA	controlled	NA	NA	NA	NA	NA	NA	15	NA	NA	NA	NA	NA	NA	Lefol, E., Danielou, V., & Darmency, H. (1996). Predicting hybridization between transgenic oilseed rape and wild mustard. Field Crops Research, 45, 153–161. http://doi.org/10.1016/0378-4290(95)00067-4
canola	31	Maskell_1999	292	brassica_oleracea	NA	NA	wild	NA	NA	controlled	NA	NA	NA	NA	NA	NA	57.8	NA	NA	NA	NA	NA	NA	Maskell, B. L. C., Raybould, a F., Cooper, J. I., Edwards, M., Gray, a J., & Microbiology, E. (1999). Effects of turnip mosaic virus and turnip yellow mosaic virus on the survival , growth and reproduction of wild cabbage ( Brassica oleracea ).
canola	32	Ammitzboll_2005	293	brassica_rapa	NA	commercial_line	domGE	barnase/bar	4	field	NA	NA	6.1	%	NA	NA	NA	NA	NA	NA	NA	NA	NA	Ammitzboll, H., Mikkelsen, T. N., & Jorgensen, R. B. (2005). Transgene expression and fitness of hybrids between GM oilseed rape and Brassica rapa. Environmental Biosafety Research, 4, 3–12. http://doi.org/10.1051/ebr
canola	32	Ammitzboll_2005	294	brassica_rapa	NA	commercial_line	domGE	barnase/bar	4	field	NA	NA	11.1	%	NA	NA	NA	NA	NA	NA	NA	NA	NA	Ammitzboll, H., Mikkelsen, T. N., & Jorgensen, R. B. (2005). Transgene expression and fitness of hybrids between GM oilseed rape and Brassica rapa. Environmental Biosafety Research, 4, 3–12. http://doi.org/10.1051/ebr
canola	32	Ammitzboll_2005	295	brassica_rapa	NA	hybrid	domNGE	NA	NA	field	NA	NA	12.4	%	NA	NA	NA	NA	NA	NA	NA	NA	NA	Ammitzboll, H., Mikkelsen, T. N., & Jorgensen, R. B. (2005). Transgene expression and fitness of hybrids between GM oilseed rape and Brassica rapa. Environmental Biosafety Research, 4, 3–12. http://doi.org/10.1051/ebr
canola	32	Ammitzboll_2005	296	brassica_rapa	NA	NA	wild	NA	NA	field	NA	NA	NA	NA	NA	NA	NA	NA	NA	NA	NA	NA	NA	Ammitzboll, H., Mikkelsen, T. N., & Jorgensen, R. B. (2005). Transgene expression and fitness of hybrids between GM oilseed rape and Brassica rapa. Environmental Biosafety Research, 4, 3–12. http://doi.org/10.1051/ebr
canola	32	Ammitzboll_2005	297	brassica_rapa	NA	commercial_line	domGE	barnase/bar	4	controlled	NA	NA	NA	NA	NA	NA	54	NA	NA	NA	NA	NA	NA	Ammitzboll, H., Mikkelsen, T. N., & Jorgensen, R. B. (2005). Transgene expression and fitness of hybrids between GM oilseed rape and Brassica rapa. Environmental Biosafety Research, 4, 3–12. http://doi.org/10.1051/ebr
canola	32	Ammitzboll_2005	298	brassica_rapa	NA	commercial_line	domGE	barnase/bar	4	controlled	NA	NA	NA	NA	NA	NA	56.1	NA	NA	NA	NA	NA	NA	Ammitzboll, H., Mikkelsen, T. N., & Jorgensen, R. B. (2005). Transgene expression and fitness of hybrids between GM oilseed rape and Brassica rapa. Environmental Biosafety Research, 4, 3–12. http://doi.org/10.1051/ebr
canola	32	Ammitzboll_2005	299	brassica_rapa	NA	hybrid	domNGE	NA	NA	controlled	NA	NA	NA	NA	NA	NA	53.2	NA	NA	NA	NA	NA	NA	Ammitzboll, H., Mikkelsen, T. N., & Jorgensen, R. B. (2005). Transgene expression and fitness of hybrids between GM oilseed rape and Brassica rapa. Environmental Biosafety Research, 4, 3–12. http://doi.org/10.1051/ebr
canola	32	Ammitzboll_2005	300	brassica_rapa	NA	NA	wild	NA	NA	controlled	NA	NA	NA	NA	NA	NA	52.1	NA	NA	NA	NA	NA	NA	Ammitzboll, H., Mikkelsen, T. N., & Jorgensen, R. B. (2005). Transgene expression and fitness of hybrids between GM oilseed rape and Brassica rapa. Environmental Biosafety Research, 4, 3–12. http://doi.org/10.1051/ebr
canola	32	Ammitzboll_2005	301	brassica_rapa	NA	commercial_line	domGE	barnase/bar	4	field	NA	NA	NA	NA	NA	NA	54.7	NA	NA	NA	NA	NA	NA	Ammitzboll, H., Mikkelsen, T. N., & Jorgensen, R. B. (2005). Transgene expression and fitness of hybrids between GM oilseed rape and Brassica rapa. Environmental Biosafety Research, 4, 3–12. http://doi.org/10.1051/ebr
canola	32	Ammitzboll_2005	302	brassica_rapa	NA	commercial_line	domGE	barnase/bar	4	field	NA	NA	NA	NA	NA	NA	47	NA	NA	NA	NA	NA	NA	Ammitzboll, H., Mikkelsen, T. N., & Jorgensen, R. B. (2005). Transgene expression and fitness of hybrids between GM oilseed rape and Brassica rapa. Environmental Biosafety Research, 4, 3–12. http://doi.org/10.1051/ebr
canola	32	Ammitzboll_2005	303	brassica_rapa	NA	hybrid	domNGE	NA	NA	field	NA	NA	NA	NA	NA	NA	49.2	NA	NA	NA	NA	NA	NA	Ammitzboll, H., Mikkelsen, T. N., & Jorgensen, R. B. (2005). Transgene expression and fitness of hybrids between GM oilseed rape and Brassica rapa. Environmental Biosafety Research, 4, 3–12. http://doi.org/10.1051/ebr
canola	32	Ammitzboll_2005	304	brassica_rapa	NA	NA	wild	NA	NA	field	NA	NA	NA	NA	NA	NA	48.9	NA	NA	NA	NA	NA	NA	Ammitzboll, H., Mikkelsen, T. N., & Jorgensen, R. B. (2005). Transgene expression and fitness of hybrids between GM oilseed rape and Brassica rapa. Environmental Biosafety Research, 4, 3–12. http://doi.org/10.1051/ebr
canola	33	Di_2009	305	brassica_juncea	NA	NA	wild	NA	NA	controlled	13303	total_number	86.32	%	NA	NA	NA	NA	NA	NA	NA	NA	NA	Di, K., Neal Stewart, C., Wei, W., Shen, B. C., Tang, Z. X., & Ma, K. P. (2009). Fitness and maternal effects in hybrids formed between transgenic oilseed rape (Brassica napus L.) and wild brown mustard [B. juncea (L.) Czern et Coss.] in the field. Pest Management Science, 65(7), 753–760. http://doi.org/10.1002/ps.1749
canola	33	Di_2009	306	brassica_napus	Westar	hybrid	domNGE	NA	NA	controlled	550	total_number	NA	NA	NA	NA	NA	NA	NA	NA	NA	NA	NA	Di, K., Neal Stewart, C., Wei, W., Shen, B. C., Tang, Z. X., & Ma, K. P. (2009). Fitness and maternal effects in hybrids formed between transgenic oilseed rape (Brassica napus L.) and wild brown mustard [B. juncea (L.) Czern et Coss.] in the field. Pest Management Science, 65(7), 753–760. http://doi.org/10.1002/ps.1749
canola	33	Di_2009	307	brassica_napus	GT	hybrid	domGE	cry1ac	2	controlled	883	total_number	NA	NA	NA	NA	NA	NA	NA	NA	NA	NA	NA	Di, K., Neal Stewart, C., Wei, W., Shen, B. C., Tang, Z. X., & Ma, K. P. (2009). Fitness and maternal effects in hybrids formed between transgenic oilseed rape (Brassica napus L.) and wild brown mustard [B. juncea (L.) Czern et Coss.] in the field. Pest Management Science, 65(7), 753–760. http://doi.org/10.1002/ps.1749
canola	33	Di_2009	308	brassica_napus	Westar	hybrid	domNGE	NA	NA	controlled	1398	total_number	NA	NA	NA	NA	159	250	total_number	66.6	cm	NA	NA	Di, K., Neal Stewart, C., Wei, W., Shen, B. C., Tang, Z. X., & Ma, K. P. (2009). Fitness and maternal effects in hybrids formed between transgenic oilseed rape (Brassica napus L.) and wild brown mustard [B. juncea (L.) Czern et Coss.] in the field. Pest Management Science, 65(7), 753–760. http://doi.org/10.1002/ps.1749
canola	34	Song_2010	309	brassica_juncea	NA	NA	wild	NA	NA	controlled	3542	total_number	NA	NA	NA	NA	NA	NA	NA	NA	NA	NA	NA	Song, X., Wang, Z., Zuo, J., Huangfu, C., & Qiang, S. (2010). Potential gene flow of two herbicide-tolerant transgenes from oilseed rape to wild B. juncea var. gracilis. Theoretical and Applied Genetics, 120(8), 1501–1510. http://doi.org/10.1007/s00122-010-1271-3
canola	34	Song_2010	310	brassica_juncea	NA	hybrid	domGE	cp4epsps	1	controlled	252	total_number	NA	NA	NA	NA	28.1	249	total_number	NA	NA	NA	NA	Song, X., Wang, Z., Zuo, J., Huangfu, C., & Qiang, S. (2010). Potential gene flow of two herbicide-tolerant transgenes from oilseed rape to wild B. juncea var. gracilis. Theoretical and Applied Genetics, 120(8), 1501–1510. http://doi.org/10.1007/s00122-010-1271-3
canola	34	Song_2010	311	brassica_juncea	NA	NA	wild	NA	NA	controlled	3080	total_number	NA	NA	97.5	%	NA	NA	NA	NA	NA	NA	NA	Song, X., Wang, Z., Zuo, J., Huangfu, C., & Qiang, S. (2010). Potential gene flow of two herbicide-tolerant transgenes from oilseed rape to wild B. juncea var. gracilis. Theoretical and Applied Genetics, 120(8), 1501–1510. http://doi.org/10.1007/s00122-010-1271-3
canola	34	Song_2010	312	brassica_juncea	NA	hybrid	domGE	cp4epsps	1	controlled	540	total_number	NA	NA	NA	NA	NA	NA	NA	NA	NA	NA	NA	Song, X., Wang, Z., Zuo, J., Huangfu, C., & Qiang, S. (2010). Potential gene flow of two herbicide-tolerant transgenes from oilseed rape to wild B. juncea var. gracilis. Theoretical and Applied Genetics, 120(8), 1501–1510. http://doi.org/10.1007/s00122-010-1271-3
canola	34	Song_2010	313	brassica_juncea	NA	NA	wild	NA	NA	controlled	3542	total_number	92.9	%	NA	NA	NA	NA	NA	NA	NA	NA	NA	Song, X., Wang, Z., Zuo, J., Huangfu, C., & Qiang, S. (2010). Potential gene flow of two herbicide-tolerant transgenes from oilseed rape to wild B. juncea var. gracilis. Theoretical and Applied Genetics, 120(8), 1501–1510. http://doi.org/10.1007/s00122-010-1271-3
canola	34	Song_2010	314	brassica_juncea	NA	hybrid	domGE	cp4epsps	1	controlled	562	total_number	NA	NA	NA	NA	NA	NA	NA	NA	NA	NA	NA	Song, X., Wang, Z., Zuo, J., Huangfu, C., & Qiang, S. (2010). Potential gene flow of two herbicide-tolerant transgenes from oilseed rape to wild B. juncea var. gracilis. Theoretical and Applied Genetics, 120(8), 1501–1510. http://doi.org/10.1007/s00122-010-1271-3
canola	35	Huangfu_2011	315	brassica_juncea	M3	NA	wild	NA	NA	controlled	NA	NA	NA	NA	NA	NA	49.5	NA	NA	NA	NA	NA	NA	Huangfu, C. H., Qiang Sheng, S., & Song, X. L. (2011). Performance of hybrids between transgenic oilseed rape (Brassica napus) and wild Brassica juncea: An evaluation of potential for transgene escape. Crop Protection, 30(1), 57–62. http://doi.org/10.1016/j.cropro.2010.09.009
canola	35	Huangfu_2011	316	brassica_juncea	NT	NA	wild	NA	NA	controlled	NA	NA	NA	NA	NA	NA	43	NA	NA	NA	NA	NA	NA	Huangfu, C. H., Qiang Sheng, S., & Song, X. L. (2011). Performance of hybrids between transgenic oilseed rape (Brassica napus) and wild Brassica juncea: An evaluation of potential for transgene escape. Crop Protection, 30(1), 57–62. http://doi.org/10.1016/j.cropro.2010.09.009
canola	35	Huangfu_2011	317	brassica_juncea	QY	NA	wild	NA	NA	controlled	NA	NA	NA	NA	NA	NA	45.8	NA	NA	NA	NA	NA	NA	Huangfu, C. H., Qiang Sheng, S., & Song, X. L. (2011). Performance of hybrids between transgenic oilseed rape (Brassica napus) and wild Brassica juncea: An evaluation of potential for transgene escape. Crop Protection, 30(1), 57–62. http://doi.org/10.1016/j.cropro.2010.09.009
canola	35	Huangfu_2011	318	brassica_juncea	X1	NA	wild	NA	NA	controlled	NA	NA	NA	NA	NA	NA	47.8	NA	NA	NA	NA	NA	NA	Huangfu, C. H., Qiang Sheng, S., & Song, X. L. (2011). Performance of hybrids between transgenic oilseed rape (Brassica napus) and wild Brassica juncea: An evaluation of potential for transgene escape. Crop Protection, 30(1), 57–62. http://doi.org/10.1016/j.cropro.2010.09.009
canola	35	Huangfu_2011	319	brassica_napus	RR-OSR	commercial_line	domGE	cp4epsps	1	controlled	NA	NA	NA	NA	NA	NA	53	NA	NA	NA	NA	NA	NA	Huangfu, C. H., Qiang Sheng, S., & Song, X. L. (2011). Performance of hybrids between transgenic oilseed rape (Brassica napus) and wild Brassica juncea: An evaluation of potential for transgene escape. Crop Protection, 30(1), 57–62. http://doi.org/10.1016/j.cropro.2010.09.009
canola	35	Huangfu_2011	320	brassica_spp	M3-RR-OSR	hybrid	domGE	cp4epsps	1	controlled	NA	NA	NA	NA	NA	NA	45.3	NA	NA	NA	NA	NA	NA	Huangfu, C. H., Qiang Sheng, S., & Song, X. L. (2011). Performance of hybrids between transgenic oilseed rape (Brassica napus) and wild Brassica juncea: An evaluation of potential for transgene escape. Crop Protection, 30(1), 57–62. http://doi.org/10.1016/j.cropro.2010.09.009
canola	35	Huangfu_2011	321	brassica_spp	NT-RR-OSR	hybrid	domGE	cp4epsps	1	controlled	NA	NA	NA	NA	NA	NA	44.5	NA	NA	NA	NA	NA	NA	Huangfu, C. H., Qiang Sheng, S., & Song, X. L. (2011). Performance of hybrids between transgenic oilseed rape (Brassica napus) and wild Brassica juncea: An evaluation of potential for transgene escape. Crop Protection, 30(1), 57–62. http://doi.org/10.1016/j.cropro.2010.09.009
canola	35	Huangfu_2011	322	brassica_spp	QY-RR-OSR	hybrid	domGE	cp4epsps	1	controlled	NA	NA	NA	NA	NA	NA	42.1	NA	NA	NA	NA	NA	NA	Huangfu, C. H., Qiang Sheng, S., & Song, X. L. (2011). Performance of hybrids between transgenic oilseed rape (Brassica napus) and wild Brassica juncea: An evaluation of potential for transgene escape. Crop Protection, 30(1), 57–62. http://doi.org/10.1016/j.cropro.2010.09.009
canola	35	Huangfu_2011	323	brassica_spp	X1-RR-OSR	hybrid	domGE	cp4epsps	1	controlled	NA	NA	NA	NA	NA	NA	43.3	NA	NA	NA	NA	NA	NA	Huangfu, C. H., Qiang Sheng, S., & Song, X. L. (2011). Performance of hybrids between transgenic oilseed rape (Brassica napus) and wild Brassica juncea: An evaluation of potential for transgene escape. Crop Protection, 30(1), 57–62. http://doi.org/10.1016/j.cropro.2010.09.009
canola	36	Liu_2010	324	brassica_juncea	NA	NA	wild	NA	NA	field	247	total_number	NA	NA	NA	NA	40.4	260	total_number	NA	NA	NA	NA	Liu, Y. B., Wei, W., Ma, K. P., & Darmency, H. (2010). Backcrosses to brassica napus of hybrids between B. juncea and B. napus as a source of herbicide-resistant volunteer-like feral populations. Plant Science, 179(5), 459–465. http://doi.org/10.1016/j.plantsci.2010.07.005
canola	36	Liu_2010	325	brassica_napus	Brutor	commercial_line	domNGE	NA	NA	field	238	total_number	NA	NA	NA	NA	39.8	231	total_number	NA	NA	NA	NA	Liu, Y. B., Wei, W., Ma, K. P., & Darmency, H. (2010). Backcrosses to brassica napus of hybrids between B. juncea and B. napus as a source of herbicide-resistant volunteer-like feral populations. Plant Science, 179(5), 459–465. http://doi.org/10.1016/j.plantsci.2010.07.005
canola	36	Liu_2010	326	brassica_napus	Brutor_ALS	commercial_line	domGE	herbicide_resistant	1	field	420	total_number	NA	NA	NA	NA	NA	NA	NA	NA	NA	NA	NA	Liu, Y. B., Wei, W., Ma, K. P., & Darmency, H. (2010). Backcrosses to brassica napus of hybrids between B. juncea and B. napus as a source of herbicide-resistant volunteer-like feral populations. Plant Science, 179(5), 459–465. http://doi.org/10.1016/j.plantsci.2010.07.005
canola	37	Hauser_2003	327	brassica_napus	Drakkar	commercial_line	domNGE	NA	NA	controlled	3117	total_number	NA	NA	95	%	NA	NA	NA	NA	NA	NA	NA	Hauser, T. P., Damgaard, C., & Jorgensen, R. B. (2003). Frequency-dependent fitness of hybrids between oilseed rape (Brassica napus) and weedy B. rapa (Brassicaceae). American Journal of Botany, 90(4), 571–578.
canola	37	Hauser_2003	328	brassica_rapa	NA	NA	wild	NA	NA	controlled	2693	total_number	33	%	NA	NA	NA	NA	NA	NA	NA	NA	NA	Hauser, T. P., Damgaard, C., & Jorgensen, R. B. (2003). Frequency-dependent fitness of hybrids between oilseed rape (Brassica napus) and weedy B. rapa (Brassicaceae). American Journal of Botany, 90(4), 571–578.
canola	37	Hauser_2003	329	brassica_spp	Drakkar-wild	hybrid	domNGE	NA	NA	controlled	1900	total_number	95	%	NA	NA	NA	NA	NA	NA	NA	NA	NA	Hauser, T. P., Damgaard, C., & Jorgensen, R. B. (2003). Frequency-dependent fitness of hybrids between oilseed rape (Brassica napus) and weedy B. rapa (Brassicaceae). American Journal of Botany, 90(4), 571–578.
canola	37	Hauser_2003	330	brassica_spp	Drakkar-wild	hybrid	domNGE	NA	NA	controlled	1831	total_number	NA	NA	97.7	%	NA	NA	NA	NA	NA	NA	NA	Hauser, T. P., Damgaard, C., & Jorgensen, R. B. (2003). Frequency-dependent fitness of hybrids between oilseed rape (Brassica napus) and weedy B. rapa (Brassicaceae). American Journal of Botany, 90(4), 571–578.
canola	38	Snow_1999	331	brassica_napus	Drakkar	commercial_line	domGE	bar/neo	1	controlled	653	total_number	81	%	NA	NA	NA	NA	NA	NA	NA	NA	NA	Snow, A. S., Andersen, B., & Jorgensen, R. B. (1999). Costs of transgenic herbicide resistance introgressed from Brassica napus into weedy B . rapa. Molecular Ecology, 8, 605–615.
canola	38	Snow_1999	332	brassica_napus	Drakkar	hybrid	domNGE	NA	NA	controlled	767	total_number	NA	NA	NA	NA	NA	NA	NA	NA	NA	NA	NA	Snow, A. S., Andersen, B., & Jorgensen, R. B. (1999). Costs of transgenic herbicide resistance introgressed from Brassica napus into weedy B . rapa. Molecular Ecology, 8, 605–615.
canola	38	Snow_1999	333	brassica_rapa	NA	NA	wild	NA	NA	controlled	1041	total_number	70.6	%	NA	NA	NA	NA	NA	NA	NA	NA	NA	Snow, A. S., Andersen, B., & Jorgensen, R. B. (1999). Costs of transgenic herbicide resistance introgressed from Brassica napus into weedy B . rapa. Molecular Ecology, 8, 605–615.
canola	39	Kerlan_1992	334	brassica_napus	Westar	commercial_line	domGE	bar	NA	controlled	NA	NA	NA	NA	NA	NA	39.9	NA	NA	NA	NA	NA	NA	Kerlan, M. C., Chèvre, A. M., Eber, F., Baranger, A., & Renard, M. (1992). Risk assessment of outcrossing of transgenic rapessed to related species: - I. Interspecific hybrid production under optimal conditions with emphasis on pollination and fertilization. Euphytica, 62(2), 145–153. http://doi.org/10.1007/BF00037940
canola	40	Allainguillaume_2006	335	brassica_rapa	NA	NA	wild	NA	NA	controlled	13179	total_number	83.5	%	NA	NA	NA	NA	NA	NA	NA	NA	NA	Allainguillaume, J., Alexander, M., Bullock, J. M., Saunders, M., Allender, C. J., King, G., … Wilkinson, M. J. (2006). Fitness of hybrids between rapeseed (Brassica napus) and wild Brassica rapa in natural habitats. Molecular Ecology, 15(4), 1175–1184. http://doi.org/10.1111/j.1365-294X.2006.02856.x
canola	41	Kerlan_1992	336	brassica_nigra	NA	NA	domNGE	NA	NA	controlled	NA	NA	NA	NA	NA	NA	39.3	NA	NA	NA	NA	NA	NA	Kerlan, M. C., Chèvre, A. M., Eber, F., Baranger, A., & Renard, M. (1992). Risk assessment of outcrossing of transgenic rapessed to related species: - I. Interspecific hybrid production under optimal conditions with emphasis on pollination and fertilization. Euphytica, 62(2), 145–153. http://doi.org/10.1007/BF00037940
canola	40	Allainguillaume_2006	337	brassica_spp	NA	hybrid	domNGE	NA	NA	controlled	6176	total_number	NA	NA	NA	NA	NA	NA	NA	NA	NA	NA	NA	Allainguillaume, J., Alexander, M., Bullock, J. M., Saunders, M., Allender, C. J., King, G., … Wilkinson, M. J. (2006). Fitness of hybrids between rapeseed (Brassica napus) and wild Brassica rapa in natural habitats. Molecular Ecology, 15(4), 1175–1184. http://doi.org/10.1111/j.1365-294X.2006.02856.x
canola	41	Kerlan_1992	338	brassica_oleracea	NA	NA	domNGE	NA	NA	controlled	NA	NA	NA	NA	NA	NA	46.2	NA	NA	NA	NA	NA	NA	Kerlan, M. C., Chèvre, A. M., Eber, F., Baranger, A., & Renard, M. (1992). Risk assessment of outcrossing of transgenic rapessed to related species: - I. Interspecific hybrid production under optimal conditions with emphasis on pollination and fertilization. Euphytica, 62(2), 145–153. http://doi.org/10.1007/BF00037940
canola	42	Eber_1994	339	brassica_napus	Brutor	hybrid	domNGE	NA	NA	controlled	NA	NA	NA	NA	NA	NA	47.7	NA	NA	NA	NA	NA	NA	Eber, F., Chèvre, A. M., Baranger, A., Vallée, P., Tanguy, X., & Renard, M. (1994). Spontaneous hybridization between a male-sterile oilseed rape and two weeds. Theoretical and Applied Genetics, 88(3–4), 362–368. http://doi.org/10.1007/BF00223646
canola	42	Eber_1994	340	brassica_napus	Brutor	hybrid	domNGE	NA	NA	controlled	NA	NA	NA	NA	NA	NA	43.7	NA	NA	NA	NA	NA	NA	Eber, F., Chèvre, A. M., Baranger, A., Vallée, P., Tanguy, X., & Renard, M. (1994). Spontaneous hybridization between a male-sterile oilseed rape and two weeds. Theoretical and Applied Genetics, 88(3–4), 362–368. http://doi.org/10.1007/BF00223646
canola	43	Sutherland_2006	341	brassica_rapa	NA	NA	wild	NA	NA	controlled	1700	total_number	NA	NA	97.5	%	NA	NA	NA	NA	NA	NA	NA	Sutherland, J. P., Justinova, L., & Poppy, G. M. (2006). The responses of crop – wild Brassica hybrids to simulated herbivory and interspecific competition : Implications for transgene introgression. Environmental Biosafety, 5, 15–25. http://doi.org/10.1051/ebr
canola	43	Sutherland_2006	342	brassica_napus	NA	commercial_line	domNGE	NA	NA	controlled	1800	total_number	NA	NA	95	%	NA	NA	NA	NA	NA	NA	NA	Sutherland, J. P., Justinova, L., & Poppy, G. M. (2006). The responses of crop – wild Brassica hybrids to simulated herbivory and interspecific competition : Implications for transgene introgression. Environmental Biosafety, 5, 15–25. http://doi.org/10.1051/ebr
canola	43	Sutherland_2006	343	brassica_napus	NA	hybrid	domNGE	NA	NA	controlled	900	total_number	91	%	NA	NA	NA	NA	NA	NA	NA	NA	NA	Sutherland, J. P., Justinova, L., & Poppy, G. M. (2006). The responses of crop – wild Brassica hybrids to simulated herbivory and interspecific competition : Implications for transgene introgression. Environmental Biosafety, 5, 15–25. http://doi.org/10.1051/ebr
canola	44	Rahman_2017	344	brassica_napus	Hi-Q	commercial_line	domNGE	NA	NA	controlled	NA	NA	NA	NA	NA	NA	44	NA	NA	NA	NA	NA	NA	Lima, L. H. da S., Braccini, A. L., Scapim, C. A., Piccinin, G. G., & Ponce, R. M. (2017). Adaptability and stability of canola hybrids in different sowing dates. Revista Ciência Agronômica, 48(2), 374–380. http://doi.org/10.5935/1806-6690.20170043
canola	44	Rahman_2017	345	brassica_spp	RIL-144	commercial_line	domNGE	NA	NA	controlled	NA	NA	NA	NA	NA	NA	51.4	NA	NA	NA	NA	NA	NA	Lima, L. H. da S., Braccini, A. L., Scapim, C. A., Piccinin, G. G., & Ponce, R. M. (2017). Adaptability and stability of canola hybrids in different sowing dates. Revista Ciência Agronômica, 48(2), 374–380. http://doi.org/10.5935/1806-6690.20170043
canola	44	Rahman_2017	346	brassica_napus	Hi-QXRIL-144	hybrid	domNGE	NA	NA	controlled	NA	NA	NA	NA	NA	NA	49.8	NA	NA	NA	NA	NA	NA	Lima, L. H. da S., Braccini, A. L., Scapim, C. A., Piccinin, G. G., & Ponce, R. M. (2017). Adaptability and stability of canola hybrids in different sowing dates. Revista Ciência Agronômica, 48(2), 374–380. http://doi.org/10.5935/1806-6690.20170043
canola	44	Rahman_2017	347	brassica_napus	NA	NA	wild	NA	NA	controlled	NA	NA	NA	NA	NA	NA	49	NA	NA	NA	NA	NA	NA	Lima, L. H. da S., Braccini, A. L., Scapim, C. A., Piccinin, G. G., & Ponce, R. M. (2017). Adaptability and stability of canola hybrids in different sowing dates. Revista Ciência Agronômica, 48(2), 374–380. http://doi.org/10.5935/1806-6690.20170043
canola	44	Rahman_2017	348	brassica_napus	Hi-Q	commercial_line	domNGE	NA	NA	controlled	NA	NA	NA	NA	NA	NA	42.7	NA	NA	NA	NA	NA	NA	Lima, L. H. da S., Braccini, A. L., Scapim, C. A., Piccinin, G. G., & Ponce, R. M. (2017). Adaptability and stability of canola hybrids in different sowing dates. Revista Ciência Agronômica, 48(2), 374–380. http://doi.org/10.5935/1806-6690.20170043
canola	44	Rahman_2017	349	brassica_spp	RIL-144	commercial_line	domNGE	NA	NA	controlled	NA	NA	NA	NA	NA	NA	44.7	NA	NA	NA	NA	NA	NA	Lima, L. H. da S., Braccini, A. L., Scapim, C. A., Piccinin, G. G., & Ponce, R. M. (2017). Adaptability and stability of canola hybrids in different sowing dates. Revista Ciência Agronômica, 48(2), 374–380. http://doi.org/10.5935/1806-6690.20170043
canola	44	Rahman_2017	350	brassica_napus	Hi-QXRIL-144	hybrid	domNGE	NA	NA	controlled	NA	NA	NA	NA	NA	NA	40	NA	NA	NA	NA	NA	NA	Lima, L. H. da S., Braccini, A. L., Scapim, C. A., Piccinin, G. G., & Ponce, R. M. (2017). Adaptability and stability of canola hybrids in different sowing dates. Revista Ciência Agronômica, 48(2), 374–380. http://doi.org/10.5935/1806-6690.20170043
canola	44	Rahman_2017	351	brassica_napus	NA	NA	wild	NA	NA	controlled	NA	NA	NA	NA	NA	NA	44.7	NA	NA	NA	NA	NA	NA	Lima, L. H. da S., Braccini, A. L., Scapim, C. A., Piccinin, G. G., & Ponce, R. M. (2017). Adaptability and stability of canola hybrids in different sowing dates. Revista Ciência Agronômica, 48(2), 374–380. http://doi.org/10.5935/1806-6690.20170043
canola	44	Rahman_2017	352	brassica_napus	Hi-Q	commercial_line	domNGE	NA	NA	controlled	NA	NA	NA	NA	NA	NA	48.3	NA	NA	NA	NA	NA	NA	Lima, L. H. da S., Braccini, A. L., Scapim, C. A., Piccinin, G. G., & Ponce, R. M. (2017). Adaptability and stability of canola hybrids in different sowing dates. Revista Ciência Agronômica, 48(2), 374–380. http://doi.org/10.5935/1806-6690.20170043
canola	44	Rahman_2017	353	brassica_spp	RIL-144	commercial_line	domNGE	NA	NA	controlled	NA	NA	NA	NA	NA	NA	49.9	NA	NA	NA	NA	NA	NA	Lima, L. H. da S., Braccini, A. L., Scapim, C. A., Piccinin, G. G., & Ponce, R. M. (2017). Adaptability and stability of canola hybrids in different sowing dates. Revista Ciência Agronômica, 48(2), 374–380. http://doi.org/10.5935/1806-6690.20170043
canola	44	Rahman_2017	354	brassica_napus	Hi-QXRIL-144	hybrid	domNGE	NA	NA	controlled	NA	NA	NA	NA	NA	NA	45.2	NA	NA	NA	NA	NA	NA	Lima, L. H. da S., Braccini, A. L., Scapim, C. A., Piccinin, G. G., & Ponce, R. M. (2017). Adaptability and stability of canola hybrids in different sowing dates. Revista Ciência Agronômica, 48(2), 374–380. http://doi.org/10.5935/1806-6690.20170043
canola	44	Rahman_2017	355	brassica_napus	NA	NA	wild	NA	NA	controlled	NA	NA	NA	NA	NA	NA	46.5	NA	NA	NA	NA	NA	NA	Lima, L. H. da S., Braccini, A. L., Scapim, C. A., Piccinin, G. G., & Ponce, R. M. (2017). Adaptability and stability of canola hybrids in different sowing dates. Revista Ciência Agronômica, 48(2), 374–380. http://doi.org/10.5935/1806-6690.20170043
canola	44	Rahman_2017	356	brassica_napus	Hi-Q	commercial_line	domNGE	NA	NA	controlled	NA	NA	NA	NA	NA	NA	65	NA	NA	112	cm	NA	NA	Lima, L. H. da S., Braccini, A. L., Scapim, C. A., Piccinin, G. G., & Ponce, R. M. (2017). Adaptability and stability of canola hybrids in different sowing dates. Revista Ciência Agronômica, 48(2), 374–380. http://doi.org/10.5935/1806-6690.20170043
canola	44	Rahman_2017	357	brassica_spp	RIL-144	commercial_line	domNGE	NA	NA	controlled	NA	NA	NA	NA	NA	NA	71	NA	NA	144	cm	NA	NA	Lima, L. H. da S., Braccini, A. L., Scapim, C. A., Piccinin, G. G., & Ponce, R. M. (2017). Adaptability and stability of canola hybrids in different sowing dates. Revista Ciência Agronômica, 48(2), 374–380. http://doi.org/10.5935/1806-6690.20170043
canola	44	Rahman_2017	358	brassica_napus	Hi-QXRIL-144	hybrid	domNGE	NA	NA	controlled	NA	NA	NA	NA	NA	NA	62	NA	NA	133.5	cm	NA	NA	Lima, L. H. da S., Braccini, A. L., Scapim, C. A., Piccinin, G. G., & Ponce, R. M. (2017). Adaptability and stability of canola hybrids in different sowing dates. Revista Ciência Agronômica, 48(2), 374–380. http://doi.org/10.5935/1806-6690.20170043
canola	44	Rahman_2017	359	brassica_napus	NA	NA	wild	NA	NA	controlled	NA	NA	NA	NA	NA	NA	37.5	NA	NA	127.5	cm	NA	NA	Lima, L. H. da S., Braccini, A. L., Scapim, C. A., Piccinin, G. G., & Ponce, R. M. (2017). Adaptability and stability of canola hybrids in different sowing dates. Revista Ciência Agronômica, 48(2), 374–380. http://doi.org/10.5935/1806-6690.20170043
canola	44	Rahman_2017	360	brassica_napus	Hi-Q	commercial_line	domNGE	NA	NA	controlled	NA	NA	NA	NA	NA	NA	86	NA	NA	188.5	cm	NA	NA	Lima, L. H. da S., Braccini, A. L., Scapim, C. A., Piccinin, G. G., & Ponce, R. M. (2017). Adaptability and stability of canola hybrids in different sowing dates. Revista Ciência Agronômica, 48(2), 374–380. http://doi.org/10.5935/1806-6690.20170043
canola	44	Rahman_2017	361	brassica_spp	RIL-144	commercial_line	domNGE	NA	NA	controlled	NA	NA	NA	NA	NA	NA	94.5	NA	NA	197	cm	NA	NA	Lima, L. H. da S., Braccini, A. L., Scapim, C. A., Piccinin, G. G., & Ponce, R. M. (2017). Adaptability and stability of canola hybrids in different sowing dates. Revista Ciência Agronômica, 48(2), 374–380. http://doi.org/10.5935/1806-6690.20170043
canola	44	Rahman_2017	362	brassica_napus	Hi-QXRIL-144	hybrid	domNGE	NA	NA	controlled	NA	NA	NA	NA	NA	NA	89.7	NA	NA	194.1	cm	NA	NA	Lima, L. H. da S., Braccini, A. L., Scapim, C. A., Piccinin, G. G., & Ponce, R. M. (2017). Adaptability and stability of canola hybrids in different sowing dates. Revista Ciência Agronômica, 48(2), 374–380. http://doi.org/10.5935/1806-6690.20170043
canola	44	Rahman_2017	363	brassica_napus	NA	NA	wild	NA	NA	controlled	NA	NA	NA	NA	NA	NA	93.8	NA	NA	73	cm	NA	NA	Lima, L. H. da S., Braccini, A. L., Scapim, C. A., Piccinin, G. G., & Ponce, R. M. (2017). Adaptability and stability of canola hybrids in different sowing dates. Revista Ciência Agronômica, 48(2), 374–380. http://doi.org/10.5935/1806-6690.20170043
canola	44	Rahman_2017	364	brassica_napus	Hi-Q	commercial_line	domNGE	NA	NA	controlled	NA	NA	NA	NA	NA	NA	94	NA	NA	75.6	cm	NA	NA	Lima, L. H. da S., Braccini, A. L., Scapim, C. A., Piccinin, G. G., & Ponce, R. M. (2017). Adaptability and stability of canola hybrids in different sowing dates. Revista Ciência Agronômica, 48(2), 374–380. http://doi.org/10.5935/1806-6690.20170043
canola	44	Rahman_2017	365	brassica_spp	RIL-144	commercial_line	domNGE	NA	NA	controlled	NA	NA	NA	NA	NA	NA	103	NA	NA	77.5	cm	NA	NA	Lima, L. H. da S., Braccini, A. L., Scapim, C. A., Piccinin, G. G., & Ponce, R. M. (2017). Adaptability and stability of canola hybrids in different sowing dates. Revista Ciência Agronômica, 48(2), 374–380. http://doi.org/10.5935/1806-6690.20170043
canola	44	Rahman_2017	366	brassica_napus	Hi-QXRIL-144	hybrid	domNGE	NA	NA	controlled	NA	NA	NA	NA	NA	NA	121.8	NA	NA	44.5	cm	NA	NA	Lima, L. H. da S., Braccini, A. L., Scapim, C. A., Piccinin, G. G., & Ponce, R. M. (2017). Adaptability and stability of canola hybrids in different sowing dates. Revista Ciência Agronômica, 48(2), 374–380. http://doi.org/10.5935/1806-6690.20170043
canola	44	Rahman_2017	367	brassica_napus	NA	NA	wild	NA	NA	controlled	NA	NA	NA	NA	NA	NA	167.7	NA	NA	144.6	cm	NA	NA	Lima, L. H. da S., Braccini, A. L., Scapim, C. A., Piccinin, G. G., & Ponce, R. M. (2017). Adaptability and stability of canola hybrids in different sowing dates. Revista Ciência Agronômica, 48(2), 374–380. http://doi.org/10.5935/1806-6690.20170043
canola	44	Rahman_2017	368	brassica_napus	Hi-Q	commercial_line	domNGE	NA	NA	controlled	NA	NA	NA	NA	NA	NA	174.7	NA	NA	169.4	cm	NA	NA	Lima, L. H. da S., Braccini, A. L., Scapim, C. A., Piccinin, G. G., & Ponce, R. M. (2017). Adaptability and stability of canola hybrids in different sowing dates. Revista Ciência Agronômica, 48(2), 374–380. http://doi.org/10.5935/1806-6690.20170043
canola	44	Rahman_2017	369	brassica_napus	Hi-QXRIL-144	hybrid	domNGE	NA	NA	controlled	NA	NA	NA	NA	NA	NA	179.7	NA	NA	151.7	cm	NA	NA	Lima, L. H. da S., Braccini, A. L., Scapim, C. A., Piccinin, G. G., & Ponce, R. M. (2017). Adaptability and stability of canola hybrids in different sowing dates. Revista Ciência Agronômica, 48(2), 374–380. http://doi.org/10.5935/1806-6690.20170043
canola	44	Rahman_2017	370	brassica_napus	NA	NA	wild	NA	NA	controlled	NA	NA	NA	NA	NA	NA	172.7	NA	NA	172.8	cm	NA	NA	Lima, L. H. da S., Braccini, A. L., Scapim, C. A., Piccinin, G. G., & Ponce, R. M. (2017). Adaptability and stability of canola hybrids in different sowing dates. Revista Ciência Agronômica, 48(2), 374–380. http://doi.org/10.5935/1806-6690.20170043
canola	44	Rahman_2017	371	brassica_napus	Hi-Q	commercial_line	domNGE	NA	NA	controlled	NA	NA	NA	NA	NA	NA	175.3	NA	NA	183.3	cm	NA	NA	Lima, L. H. da S., Braccini, A. L., Scapim, C. A., Piccinin, G. G., & Ponce, R. M. (2017). Adaptability and stability of canola hybrids in different sowing dates. Revista Ciência Agronômica, 48(2), 374–380. http://doi.org/10.5935/1806-6690.20170043
canola	44	Rahman_2017	372	brassica_spp	RIL-144	commercial_line	domNGE	NA	NA	controlled	NA	NA	NA	NA	NA	NA	178	NA	NA	180.7	cm	NA	NA	Lima, L. H. da S., Braccini, A. L., Scapim, C. A., Piccinin, G. G., & Ponce, R. M. (2017). Adaptability and stability of canola hybrids in different sowing dates. Revista Ciência Agronômica, 48(2), 374–380. http://doi.org/10.5935/1806-6690.20170043
canola	44	Rahman_2017	373	brassica_napus	Hi-QXRIL-144	hybrid	domNGE	NA	NA	controlled	NA	NA	NA	NA	NA	NA	180.7	NA	NA	192	cm	NA	NA	Lima, L. H. da S., Braccini, A. L., Scapim, C. A., Piccinin, G. G., & Ponce, R. M. (2017). Adaptability and stability of canola hybrids in different sowing dates. Revista Ciência Agronômica, 48(2), 374–380. http://doi.org/10.5935/1806-6690.20170043
canola	44	Rahman_2017	374	brassica_napus	NA	NA	wild	NA	NA	controlled	NA	NA	NA	NA	NA	NA	175.3	NA	NA	187.7	cm	NA	NA	Lima, L. H. da S., Braccini, A. L., Scapim, C. A., Piccinin, G. G., & Ponce, R. M. (2017). Adaptability and stability of canola hybrids in different sowing dates. Revista Ciência Agronômica, 48(2), 374–380. http://doi.org/10.5935/1806-6690.20170043
canola	44	Rahman_2017	375	brassica_napus	Hi-Q	commercial_line	domNGE	NA	NA	controlled	NA	NA	NA	NA	NA	NA	NA	NA	NA	NA	NA	NA	NA	Lima, L. H. da S., Braccini, A. L., Scapim, C. A., Piccinin, G. G., & Ponce, R. M. (2017). Adaptability and stability of canola hybrids in different sowing dates. Revista Ciência Agronômica, 48(2), 374–380. http://doi.org/10.5935/1806-6690.20170043
canola	44	Rahman_2017	376	brassica_spp	RIL-144	commercial_line	domNGE	NA	NA	controlled	NA	NA	NA	NA	NA	NA	NA	NA	NA	NA	NA	NA	NA	Lima, L. H. da S., Braccini, A. L., Scapim, C. A., Piccinin, G. G., & Ponce, R. M. (2017). Adaptability and stability of canola hybrids in different sowing dates. Revista Ciência Agronômica, 48(2), 374–380. http://doi.org/10.5935/1806-6690.20170043
canola	44	Rahman_2017	377	brassica_napus	Hi-QXRIL-144	hybrid	domNGE	NA	NA	controlled	NA	NA	NA	NA	NA	NA	NA	NA	NA	NA	NA	NA	NA	Lima, L. H. da S., Braccini, A. L., Scapim, C. A., Piccinin, G. G., & Ponce, R. M. (2017). Adaptability and stability of canola hybrids in different sowing dates. Revista Ciência Agronômica, 48(2), 374–380. http://doi.org/10.5935/1806-6690.20170043
canola	44	Rahman_2017	378	brassica_napus	NA	NA	wild	NA	NA	controlled	NA	NA	NA	NA	NA	NA	NA	NA	NA	NA	NA	NA	NA	Lima, L. H. da S., Braccini, A. L., Scapim, C. A., Piccinin, G. G., & Ponce, R. M. (2017). Adaptability and stability of canola hybrids in different sowing dates. Revista Ciência Agronômica, 48(2), 374–380. http://doi.org/10.5935/1806-6690.20170043
canola	45	Lima_2017	379	brassica_napus	Hyola_61	commercial_line	domNGE	NA	NA	controlled	NA	NA	NA	NA	NA	NA	NA	NA	NA	NA	NA	NA	NA	Lima, L. H. da S., Braccini, A. L., Scapim, C. A., Piccinin, G. G., & Ponce, R. M. (2017). Adaptability and stability of canola hybrids in different sowing dates. Revista Ciência Agronômica, 48(2), 374–380. http://doi.org/10.5935/1806-6690.20170043
canola	45	Lima_2017	380	brassica_napus	Hyola_76	commercial_line	domNGE	NA	NA	controlled	NA	NA	NA	NA	NA	NA	NA	NA	NA	NA	NA	NA	NA	Lima, L. H. da S., Braccini, A. L., Scapim, C. A., Piccinin, G. G., & Ponce, R. M. (2017). Adaptability and stability of canola hybrids in different sowing dates. Revista Ciência Agronômica, 48(2), 374–380. http://doi.org/10.5935/1806-6690.20170043
canola	45	Lima_2017	381	brassica_napus	Hyola_411	commercial_line	domNGE	NA	NA	controlled	NA	NA	NA	NA	NA	NA	NA	NA	NA	NA	NA	NA	NA	Lima, L. H. da S., Braccini, A. L., Scapim, C. A., Piccinin, G. G., & Ponce, R. M. (2017). Adaptability and stability of canola hybrids in different sowing dates. Revista Ciência Agronômica, 48(2), 374–380. http://doi.org/10.5935/1806-6690.20170043
canola	45	Lima_2017	382	brassica_napus	Hyola_433	commercial_line	domNGE	NA	NA	controlled	NA	NA	NA	NA	92.25	%	NA	NA	NA	NA	NA	NA	NA	Lima, L. H. da S., Braccini, A. L., Scapim, C. A., Piccinin, G. G., & Ponce, R. M. (2017). Adaptability and stability of canola hybrids in different sowing dates. Revista Ciência Agronômica, 48(2), 374–380. http://doi.org/10.5935/1806-6690.20170043
canola	46	Sharma_2015	383	brassica_napus	PBR210	commercial_line	domNGE	NA	NA	controlled	NA	NA	NA	NA	92	%	NA	NA	NA	NA	NA	NA	NA	Sharma, P., & Sardana, V. (2015). Evaluating morpho-physiological and quality traits to complimentn seed yield under changing conditions in Brassica. Journal of Environmental Biology, 37(July), 492–502.
canola	46	Sharma_2015	384	brassica_napus	PBR91	commercial_line	domNGE	NA	NA	controlled	NA	NA	NA	NA	68.5	%	NA	NA	NA	NA	NA	NA	NA	Sharma, P., & Sardana, V. (2015). Evaluating morpho-physiological and quality traits to complimentn seed yield under changing conditions in Brassica. Journal of Environmental Biology, 37(July), 492–502.
canola	46	Sharma_2015	385	brassica_napus	RLC1	commercial_line	domNGE	NA	NA	controlled	NA	NA	NA	NA	NA	NA	110.8	NA	NA	NA	NA	NA	NA	Sharma, P., & Sardana, V. (2015). Evaluating morpho-physiological and quality traits to complimentn seed yield under changing conditions in Brassica. Journal of Environmental Biology, 37(July), 492–502.
canola	46	Sharma_2015	386	brassica_juncea	GSC6	commercial_line	domNGE	NA	NA	controlled	NA	NA	NA	NA	NA	NA	69	NA	NA	NA	NA	NA	NA	Sharma, P., & Sardana, V. (2015). Evaluating morpho-physiological and quality traits to complimentn seed yield under changing conditions in Brassica. Journal of Environmental Biology, 37(July), 492–502.
canola	46	Sharma_2015	387	brassica_napus	GSC5	commercial_line	domNGE	NA	NA	controlled	NA	NA	NA	NA	NA	NA	108.7	NA	NA	NA	NA	NA	NA	Sharma, P., & Sardana, V. (2015). Evaluating morpho-physiological and quality traits to complimentn seed yield under changing conditions in Brassica. Journal of Environmental Biology, 37(July), 492–502.
canola	46	Sharma_2015	388	brassica_napus	HyolaPAC401	hybrid	domNGE	NA	NA	controlled	NA	NA	NA	NA	NA	NA	55.3	NA	NA	NA	NA	NA	NA	Sharma, P., & Sardana, V. (2015). Evaluating morpho-physiological and quality traits to complimentn seed yield under changing conditions in Brassica. Journal of Environmental Biology, 37(July), 492–502.
canola	46	Sharma_2015	389	brassica_napus	PC5	hybrid	domNGE	NA	NA	controlled	NA	NA	NA	NA	NA	NA	93.7	NA	NA	NA	NA	NA	NA	Sharma, P., & Sardana, V. (2015). Evaluating morpho-physiological and quality traits to complimentn seed yield under changing conditions in Brassica. Journal of Environmental Biology, 37(July), 492–502.
canola	47	Uzun_2009	390	brassica_napus	Bristol	commercial_line	domNGE	NA	NA	controlled	6606	total_number	NA	NA	NA	NA	NA	NA	NA	NA	NA	NA	NA	Uzun, B., Zengin, Ü., Furat, S., & Akdesir, Ö. (2009). Sowing date effects on growth, flowering, oil content and seed yield of canola cultivars. Asian Journal of Chemistry, 21(3), 1957–1965.
canola	47	Uzun_2009	391	brassica_napus	Capitol	commercial_line	domNGE	NA	NA	controlled	6666	total_number	NA	NA	30	%	NA	NA	NA	NA	NA	NA	NA	Uzun, B., Zengin, Ü., Furat, S., & Akdesir, Ö. (2009). Sowing date effects on growth, flowering, oil content and seed yield of canola cultivars. Asian Journal of Chemistry, 21(3), 1957–1965.
canola	47	Uzun_2009	392	brassica_napus	Licord	commercial_line	domNGE	NA	NA	controlled	6746	total_number	NA	NA	39	%	NA	NA	NA	NA	NA	NA	NA	Uzun, B., Zengin, Ü., Furat, S., & Akdesir, Ö. (2009). Sowing date effects on growth, flowering, oil content and seed yield of canola cultivars. Asian Journal of Chemistry, 21(3), 1957–1965.
canola	47	Uzun_2009	393	brassica_napus	Licrown	commercial_line	domNGE	NA	NA	controlled	8049	total_number	72.91	%	NA	NA	NA	NA	NA	NA	NA	NA	NA	Uzun, B., Zengin, Ü., Furat, S., & Akdesir, Ö. (2009). Sowing date effects on growth, flowering, oil content and seed yield of canola cultivars. Asian Journal of Chemistry, 21(3), 1957–1965.
canola	47	Uzun_2009	394	brassica_napus	Bristol	commercial_line	domNGE	NA	NA	controlled	5323	total_number	NA	NA	NA	NA	NA	NA	NA	NA	NA	NA	NA	Uzun, B., Zengin, Ü., Furat, S., & Akdesir, Ö. (2009). Sowing date effects on growth, flowering, oil content and seed yield of canola cultivars. Asian Journal of Chemistry, 21(3), 1957–1965.
canola	47	Uzun_2009	395	brassica_napus	Capitol	commercial_line	domNGE	NA	NA	controlled	3894	total_number	84.4	%	NA	NA	NA	NA	NA	NA	NA	NA	NA	Uzun, B., Zengin, Ü., Furat, S., & Akdesir, Ö. (2009). Sowing date effects on growth, flowering, oil content and seed yield of canola cultivars. Asian Journal of Chemistry, 21(3), 1957–1965.
canola	47	Uzun_2009	396	brassica_napus	Licord	commercial_line	domNGE	NA	NA	controlled	4075	total_number	97.4	%	NA	NA	NA	NA	NA	NA	NA	NA	NA	Uzun, B., Zengin, Ü., Furat, S., & Akdesir, Ö. (2009). Sowing date effects on growth, flowering, oil content and seed yield of canola cultivars. Asian Journal of Chemistry, 21(3), 1957–1965.
canola	47	Uzun_2009	397	brassica_napus	Licrown	commercial_line	domNGE	NA	NA	controlled	3803	total_number	96	%	NA	NA	NA	NA	NA	NA	NA	NA	NA	Uzun, B., Zengin, Ü., Furat, S., & Akdesir, Ö. (2009). Sowing date effects on growth, flowering, oil content and seed yield of canola cultivars. Asian Journal of Chemistry, 21(3), 1957–1965.
canola	48	Gunasekera_2006	398	brassica_juncea	887.1.6.1.	commercial_line	domNGE	NA	NA	controlled	117	total_number	NA	NA	70	%	NA	98	total_number	NA	NA	NA	NA	Gunasekera, C. P., Martin, L. D., Siddique, K. H. M., & Walton, G. H. (2006). Genotype by environment interactions of Indian mustard (Brassica juncea L.) and canola (B. napus L.) in Mediterranean-type environments. 1. Crop growth and seed yield. European Journal of Agronomy, 25(1), 1–12. http://doi.org/10.1016/j.eja.2005.08.002
canola	48	Gunasekera_2006	399	brassica_juncea	JM25	commercial_line	domNGE	NA	NA	controlled	96	total_number	NA	NA	NA	NA	NA	NA	NA	NA	NA	NA	NA	Gunasekera, C. P., Martin, L. D., Siddique, K. H. M., & Walton, G. H. (2006). Genotype by environment interactions of Indian mustard (Brassica juncea L.) and canola (B. napus L.) in Mediterranean-type environments. 1. Crop growth and seed yield. European Journal of Agronomy, 25(1), 1–12. http://doi.org/10.1016/j.eja.2005.08.002
canola	48	Gunasekera_2006	400	brassica_juncea	JM33	commercial_line	domNGE	NA	NA	controlled	90	total_number	NA	NA	NA	NA	NA	NA	NA	NA	NA	NA	NA	Gunasekera, C. P., Martin, L. D., Siddique, K. H. M., & Walton, G. H. (2006). Genotype by environment interactions of Indian mustard (Brassica juncea L.) and canola (B. napus L.) in Mediterranean-type environments. 1. Crop growth and seed yield. European Journal of Agronomy, 25(1), 1–12. http://doi.org/10.1016/j.eja.2005.08.002
canola	48	Gunasekera_2006	401	brassica_juncea	Muscon_M-973	commercial_line	domNGE	NA	NA	controlled	80	total_number	NA	NA	NA	NA	NA	NA	NA	NA	NA	NA	NA	Gunasekera, C. P., Martin, L. D., Siddique, K. H. M., & Walton, G. H. (2006). Genotype by environment interactions of Indian mustard (Brassica juncea L.) and canola (B. napus L.) in Mediterranean-type environments. 1. Crop growth and seed yield. European Journal of Agronomy, 25(1), 1–12. http://doi.org/10.1016/j.eja.2005.08.002
canola	48	Gunasekera_2006	402	brassica_juncea	82NO.2298	commercial_line	domNGE	NA	NA	controlled	90	total_number	NA	NA	NA	NA	NA	NA	NA	NA	NA	NA	NA	Gunasekera, C. P., Martin, L. D., Siddique, K. H. M., & Walton, G. H. (2006). Genotype by environment interactions of Indian mustard (Brassica juncea L.) and canola (B. napus L.) in Mediterranean-type environments. 1. Crop growth and seed yield. European Journal of Agronomy, 25(1), 1–12. http://doi.org/10.1016/j.eja.2005.08.002
canola	48	Gunasekera_2006	403	brassica_napus	Monty	commercial_line	domNGE	NA	NA	controlled	114	total_number	NA	NA	50	%	NA	NA	NA	NA	NA	NA	NA	Gunasekera, C. P., Martin, L. D., Siddique, K. H. M., & Walton, G. H. (2006). Genotype by environment interactions of Indian mustard (Brassica juncea L.) and canola (B. napus L.) in Mediterranean-type environments. 1. Crop growth and seed yield. European Journal of Agronomy, 25(1), 1–12. http://doi.org/10.1016/j.eja.2005.08.002
canola	48	Gunasekera_2006	404	brassica_napus	Oscar	commercial_line	domNGE	NA	NA	controlled	90	total_number	NA	NA	NA	NA	NA	NA	NA	NA	NA	NA	NA	Gunasekera, C. P., Martin, L. D., Siddique, K. H. M., & Walton, G. H. (2006). Genotype by environment interactions of Indian mustard (Brassica juncea L.) and canola (B. napus L.) in Mediterranean-type environments. 1. Crop growth and seed yield. European Journal of Agronomy, 25(1), 1–12. http://doi.org/10.1016/j.eja.2005.08.002
canola	49	Alakahoon_2016	405	brassica_napus	Westar	commercial_line	domGE	NA	NA	controlled	810	total_number	NA	NA	NA	NA	NA	NA	NA	NA	NA	NA	NA	Alahakoon, U., Adamson, J., Grenkow, L., Soroka, J., Bonham-Smith, P., & Gruber, M. (2016). Field growth traits and insect-host plant interactions of two transgenic canola (Brassicaceae) lines with elevated trichome numbers. The Canadian Entomologist, 148(5), 603–615. http://doi.org/10.4039/tce.2016.9
canola	49	Alakahoon_2016	406	brassica_napus	K-5-8	commercial_line	domNGE	NA	NA	controlled	1177	total_number	98.3	%	NA	NA	NA	NA	NA	NA	NA	NA	NA	Alahakoon, U., Adamson, J., Grenkow, L., Soroka, J., Bonham-Smith, P., & Gruber, M. (2016). Field growth traits and insect-host plant interactions of two transgenic canola (Brassicaceae) lines with elevated trichome numbers. The Canadian Entomologist, 148(5), 603–615. http://doi.org/10.4039/tce.2016.9
canola	49	Alakahoon_2016	407	brassica_napus	AtGL3t	commercial_line	domNGE	NA	NA	controlled	609	total_number	NA	NA	NA	NA	NA	NA	NA	NA	NA	NA	NA	Alahakoon, U., Adamson, J., Grenkow, L., Soroka, J., Bonham-Smith, P., & Gruber, M. (2016). Field growth traits and insect-host plant interactions of two transgenic canola (Brassicaceae) lines with elevated trichome numbers. The Canadian Entomologist, 148(5), 603–615. http://doi.org/10.4039/tce.2016.9
canola	50	Zhang_2016	408	brassica_napus	Hyola_50	commercial_line	domNGE	NA	NA	controlled	NA	NA	NA	NA	NA	NA	86.3	NA	NA	NA	NA	NA	NA	Zhang, H., & Flottmann, S. (2016). Genotypic variation in the accumulation of water-soluble carbohydrate in canola and its potential contribution to seed yield in different environments. Field Crops Research, 196(June), 124–133. http://doi.org/10.1016/j.fcr.2016.06.014
canola	50	Zhang_2016	409	brassica_napus	Hyola_571	commercial_line	domGE	IMI	1	controlled	NA	NA	NA	NA	NA	NA	55.6	NA	NA	NA	NA	NA	NA	Zhang, H., & Flottmann, S. (2016). Genotypic variation in the accumulation of water-soluble carbohydrate in canola and its potential contribution to seed yield in different environments. Field Crops Research, 196(June), 124–133. http://doi.org/10.1016/j.fcr.2016.06.014
canola	50	Zhang_2016	410	brassica_napus	Hyola_76	commercial_line	domNGE	NA	NA	controlled	NA	NA	NA	NA	NA	NA	50.2	NA	NA	NA	NA	NA	NA	Zhang, H., & Flottmann, S. (2016). Genotypic variation in the accumulation of water-soluble carbohydrate in canola and its potential contribution to seed yield in different environments. Field Crops Research, 196(June), 124–133. http://doi.org/10.1016/j.fcr.2016.06.014
canola	50	Zhang_2016	411	brassica_napus	PO6N_7851	commercial_line	domGE	IMI	1	controlled	NA	NA	NA	NA	NA	NA	NA	95	total_number	NA	NA	NA	NA	Zhang, H., & Flottmann, S. (2016). Genotypic variation in the accumulation of water-soluble carbohydrate in canola and its potential contribution to seed yield in different environments. Field Crops Research, 196(June), 124–133. http://doi.org/10.1016/j.fcr.2016.06.014
canola	50	Zhang_2016	412	brassica_napus	PO6N_7881	commercial_line	domGE	IMI	1	controlled	NA	NA	NA	NA	NA	NA	NA	NA	NA	156.7	cm	NA	NA	Zhang, H., & Flottmann, S. (2016). Genotypic variation in the accumulation of water-soluble carbohydrate in canola and its potential contribution to seed yield in different environments. Field Crops Research, 196(June), 124–133. http://doi.org/10.1016/j.fcr.2016.06.014
canola	50	Zhang_2016	413	brassica_napus	P46Y78	commercial_line	domGE	IMI	1	controlled	NA	NA	NA	NA	NA	NA	NA	NA	NA	151	cm	NA	NA	Zhang, H., & Flottmann, S. (2016). Genotypic variation in the accumulation of water-soluble carbohydrate in canola and its potential contribution to seed yield in different environments. Field Crops Research, 196(June), 124–133. http://doi.org/10.1016/j.fcr.2016.06.014
canola	50	Zhang_2016	414	brassica_napus	CB_Jarden	commercial_line	domGE	IMI	1	controlled	NA	NA	NA	NA	NA	NA	NA	NA	NA	176	cm	NA	NA	Zhang, H., & Flottmann, S. (2016). Genotypic variation in the accumulation of water-soluble carbohydrate in canola and its potential contribution to seed yield in different environments. Field Crops Research, 196(June), 124–133. http://doi.org/10.1016/j.fcr.2016.06.014
canola	50	Zhang_2016	415	brassica_napus	CB-CHYB-125	commercial_line	domGE	IMI	1	controlled	NA	NA	NA	NA	NA	NA	NA	NA	NA	169.5	cm	NA	NA	Zhang, H., & Flottmann, S. (2016). Genotypic variation in the accumulation of water-soluble carbohydrate in canola and its potential contribution to seed yield in different environments. Field Crops Research, 196(June), 124–133. http://doi.org/10.1016/j.fcr.2016.06.014
canola	51	Bommarco_2012	416	brassica_napus	Stratos	commercial_line	domNGE	NA	NA	controlled	1180	total_number	NA	NA	NA	NA	NA	NA	NA	NA	NA	NA	NA	Bommarco, R., Marini, L., & Vaissière, B. E. (2012). Insect pollination enhances seed yield, quality, and market value in oilseed rape. Oecologia, 169(4), 1025–1032. http://doi.org/10.1007/s00442-012-2271-6
canola	52	Chen_2011	417	brassica_napus	Zhongyou_821	commercial_line	domNGE	NA	NA	controlled	4955	total_number	NA	NA	NA	NA	NA	NA	NA	NA	NA	NA	NA	Chen, J., Ge, X., Yao, X., Feng, Y., & Li, Z. (2011). Synthesis and characterization of interspecific trigenomic hybrids and allohexaploids between three cultivated Brassica allotetraploids and wild species. African Journal of Biotechnology, 10(57), 12171–12176. http://doi.org/10.5897/AJB10.2296
canola	52	Chen_2011	418	brassica_napus	Oro	commercial_line	domNGE	NA	NA	controlled	1421	total_number	NA	NA	NA	NA	159	126	total_number	74.6	cm	NA	NA	Chen, J., Ge, X., Yao, X., Feng, Y., & Li, Z. (2011). Synthesis and characterization of interspecific trigenomic hybrids and allohexaploids between three cultivated Brassica allotetraploids and wild species. African Journal of Biotechnology, 10(57), 12171–12176. http://doi.org/10.5897/AJB10.2296
canola	52	Chen_2011	419	brassica_napus	GJ_19	commercial_line	domNGE	NA	NA	controlled	4847	total_number	97.8	%	NA	NA	NA	NA	NA	NA	NA	NA	NA	Chen, J., Ge, X., Yao, X., Feng, Y., & Li, Z. (2011). Synthesis and characterization of interspecific trigenomic hybrids and allohexaploids between three cultivated Brassica allotetraploids and wild species. African Journal of Biotechnology, 10(57), 12171–12176. http://doi.org/10.5897/AJB10.2296
canola	52	Chen_2011	420	brassica_juncea	NA	NA	wild	NA	NA	controlled	4054	total_number	95.9	%	NA	NA	NA	NA	NA	NA	NA	NA	NA	Chen, J., Ge, X., Yao, X., Feng, Y., & Li, Z. (2011). Synthesis and characterization of interspecific trigenomic hybrids and allohexaploids between three cultivated Brassica allotetraploids and wild species. African Journal of Biotechnology, 10(57), 12171–12176. http://doi.org/10.5897/AJB10.2296
sunflower	53	Burke_2003	421	helianthus_annuus	NA	NA	wild	NA	NA	controlled	400	total_number	NA	NA	NA	NA	62	NA	NA	45	cm	NA	NA	Burke, J. M., & Rieseberg, L. H. (2003). Fitness Effects of Transgenic Disease Resistance in Sunflowers. Science, 300.
sunflower	53	Burke_2003	422	helianthus_annuus	NA	commercial_line	domGE	OxOx	3	controlled	400	total_number	NA	NA	NA	NA	63	NA	NA	46	cm	NA	NA	Burke, J. M., & Rieseberg, L. H. (2003). Fitness Effects of Transgenic Disease Resistance in Sunflowers. Science, 300.
sunflower	53	Burke_2003	423	helianthus_annuus	NA	NA	wild	NA	NA	controlled	200	total_number	NA	NA	NA	NA	NA	NA	NA	NA	NA	NA	NA	Burke, J. M., & Rieseberg, L. H. (2003). Fitness Effects of Transgenic Disease Resistance in Sunflowers. Science, 300.
sunflower	53	Burke_2003	424	helianthus_annuus	NA	commercial_line	domGE	OxOx	3	controlled	220	total_number	NA	NA	NA	NA	NA	NA	NA	NA	NA	NA	NA	Burke, J. M., & Rieseberg, L. H. (2003). Fitness Effects of Transgenic Disease Resistance in Sunflowers. Science, 300.
sunflower	53	Burke_2003	425	helianthus_annuus	NA	NA	wild	NA	NA	controlled	450	total_number	NA	NA	NA	NA	NA	NA	NA	NA	NA	NA	NA	Burke, J. M., & Rieseberg, L. H. (2003). Fitness Effects of Transgenic Disease Resistance in Sunflowers. Science, 300.
sunflower	53	Burke_2003	426	helianthus_annuus	NA	commercial_line	domGE	OxOx	3	controlled	500	total_number	NA	NA	NA	NA	92.7	65	total_number	165.25	cm	NA	NA	Burke, J. M., & Rieseberg, L. H. (2003). Fitness Effects of Transgenic Disease Resistance in Sunflowers. Science, 300.
sunflower	54	Cummings_2002	427	helianthus_annuus	NA	NA	wild	NA	NA	controlled	6350	total_number	NA	NA	NA	NA	NA	NA	NA	NA	NA	NA	NA	Cummings, C. L., Alexander, H. M., Snow, A. A., Rieseberg, L. H., Kim, M. J., & Culley, T. M. (2002). Fecundity selection in a sunflower crop-wild study: Can ecological data predict crop allele changes? Ecological Applications, 12(6), 1661–1671.
sunflower	54	Cummings_2002	428	helianthus_annuus	NA	commercial_line	domNGE	NA	NA	controlled	145	total_number	NA	NA	NA	NA	NA	50	total_number	NA	NA	NA	NA	Cummings, C. L., Alexander, H. M., Snow, A. A., Rieseberg, L. H., Kim, M. J., & Culley, T. M. (2002). Fecundity selection in a sunflower crop-wild study: Can ecological data predict crop allele changes? Ecological Applications, 12(6), 1661–1671.
sunflower	55	Donovan_2010	429	helianthus_annuus	NA	NA	wild	NA	NA	field	2001	total_number	NA	NA	NA	NA	NA	5.3	total_number	NA	NA	NA	NA	Donovan, L. A., Rosenthal, D. R., Sanchez-Velenosi, M., Rieseberg, L. H., & Ludwig, F. (2010). Are hybrid species more fit than ancestral parent species in the current hybrid species habitats? Journal of Evolutionary Biology, 23(4), 805–816. http://doi.org/10.1111/j.1420-9101.2010.01950.x
sunflower	55	Donovan_2010	430	helianthus_anomalus	NA	hybrid	domNGE	NA	NA	field	140	total_number	NA	NA	NA	NA	NA	NA	NA	NA	NA	NA	NA	Donovan, L. A., Rosenthal, D. R., Sanchez-Velenosi, M., Rieseberg, L. H., & Ludwig, F. (2010). Are hybrid species more fit than ancestral parent species in the current hybrid species habitats? Journal of Evolutionary Biology, 23(4), 805–816. http://doi.org/10.1111/j.1420-9101.2010.01950.x
sunflower	55	Donovan_2010	431	helianthus_deserticola	NA	NA	wild	NA	NA	field	410	total_number	NA	NA	NA	NA	NA	NA	NA	NA	NA	NA	NA	Donovan, L. A., Rosenthal, D. R., Sanchez-Velenosi, M., Rieseberg, L. H., & Ludwig, F. (2010). Are hybrid species more fit than ancestral parent species in the current hybrid species habitats? Journal of Evolutionary Biology, 23(4), 805–816. http://doi.org/10.1111/j.1420-9101.2010.01950.x
sunflower	55	Donovan_2010	432	helianthus_petiolaris	NA	hybrid	domNGE	NA	NA	field	1635	total_number	NA	NA	NA	NA	76.38	NA	NA	56.98	cm	NA	NA	Donovan, L. A., Rosenthal, D. R., Sanchez-Velenosi, M., Rieseberg, L. H., & Ludwig, F. (2010). Are hybrid species more fit than ancestral parent species in the current hybrid species habitats? Journal of Evolutionary Biology, 23(4), 805–816. http://doi.org/10.1111/j.1420-9101.2010.01950.x
sunflower	56	Massinga_2005	433	helianthus_annuus	NA	hybrid	domGE	ALS	1	controlled	NA	NA	NA	NA	NA	NA	48.7	NA	NA	203.5	cm	NA	NA	Massinga, R. a., Al-Khatib, K., St. Amand, P., & Miller, J. F. (2005). Relative fitness of imazamox-resistant common sunflower and prairie sunflower. Weed Science, 53(2), 166–174. http://doi.org/10.1614/WS-03-152R4
sunflower	56	Massinga_2005	434	helianthus_annuus	NA	hybrid	domNGE	NA	NA	controlled	NA	NA	NA	NA	NA	NA	60.19	NA	NA	248.3	cm	NA	NA	Massinga, R. a., Al-Khatib, K., St. Amand, P., & Miller, J. F. (2005). Relative fitness of imazamox-resistant common sunflower and prairie sunflower. Weed Science, 53(2), 166–174. http://doi.org/10.1614/WS-03-152R2
sunflower	56	Massinga_2005	435	helianthus_annuus	NA	hybrid	domGE	ALS	1	controlled	NA	NA	NA	NA	NA	NA	42.5	NA	NA	209.85	cm	NA	NA	Massinga, R. a., Al-Khatib, K., St. Amand, P., & Miller, J. F. (2005). Relative fitness of imazamox-resistant common sunflower and prairie sunflower. Weed Science, 53(2), 166–174. http://doi.org/10.1614/WS-03-152R1
sunflower	56	Massinga_2005	436	helianthus_annuus	NA	hybrid	wild	NA	NA	controlled	NA	NA	NA	NA	NA	NA	106	NA	NA	288.56	cm	NA	NA	Massinga, R. a., Al-Khatib, K., St. Amand, P., & Miller, J. F. (2005). Relative fitness of imazamox-resistant common sunflower and prairie sunflower. Weed Science, 53(2), 166–174. http://doi.org/10.1614/WS-03-152R3
sunflower	57	Mercer_2006	437	helianthus_annuus	NA	NA	wild	NA	NA	controlled	44778	total_number	NA	NA	NA	NA	49.6	267.5	total_number	NA	NA	NA	NA	Mercer, K. L., Shaw, R. G., & Wyse, D. L. (2006). Increased germination of divese crop-wild hybrid sunflower seeds. Ecological Applications, 16(3), 845–854. http://doi.org/10.1890/1051-0761(2006)016[0845:IGODCH]2.0.CO;2
sunflower	57	Mercer_2006	438	helianthus_annuus	HA89-HA425-SUB	hybrid	domGE	IMI	1	controlled	7205	total_number	NA	NA	NA	NA	NA	22.1	total_number	NA	NA	NA	NA	Mercer, K. L., Shaw, R. G., & Wyse, D. L. (2006). Increased germination of divese crop-wild hybrid sunflower seeds. Ecological Applications, 16(3), 845–854. http://doi.org/10.1890/1051-0761(2006)016[0845:IGODCH]2.0.CO;2
sunflower	58	Mercer_2007	439	helianthus_annuus	NA	NA	wild	NA	NA	controlled	62000	total_number	NA	NA	NA	NA	59.35	NA	NA	286.5	cm	NA	NA	Mercer, K. L., Andow, D. A., Wyse, D. L., & Shaw, R. G. (2007). Stress and domestication traits increase the relative fitness of crop – wild hybrids in sunflower. Ecology Letters, 10, 383–393. http://doi.org/10.1111/j.1461-0248.2007.01029.x
sunflower	58	Mercer_2007	440	helianthus_annuus	NA	hybrid	domNGE	NA	NA	controlled	NA	NA	NA	NA	NA	NA	NA	190	total_number	NA	NA	NA	NA	Mercer, K. L., Andow, D. A., Wyse, D. L., & Shaw, R. G. (2007). Stress and domestication traits increase the relative fitness of crop – wild hybrids in sunflower. Ecology Letters, 10, 383–393. http://doi.org/10.1111/j.1461-0248.2007.01029.x
sunflower	58	Mercer_2007	441	helianthus_annuus	SUR-Imi-R	commercial_line	domGE	IMI	1	controlled	15000	total_number	NA	NA	NA	NA	NA	NA	NA	NA	NA	NA	NA	Mercer, K. L., Andow, D. A., Wyse, D. L., & Shaw, R. G. (2007). Stress and domestication traits increase the relative fitness of crop – wild hybrids in sunflower. Ecology Letters, 10, 383–393. http://doi.org/10.1111/j.1461-0248.2007.01029.x
sunflower	59	Mercer_2014	442	helianthus_annuus	NA	NA	wild	NA	NA	controlled	155	total_number	NA	NA	NA	NA	NA	NA	NA	NA	NA	NA	NA	Mercer, K. L., Emry, D. J., Snow, A. A., Kost, M. A., Pace, B. A., & Alexander, H. M. (2014). Fitness of crop-wild hybrid sunflower under competitive conditions: Implications for crop-to-wild introgression. PLoS ONE, 9(10). http://doi.org/10.1371/journal.pone.0109001
sunflower	59	Mercer_2014	443	helianthus_annuus	NA	hybrid	domNGE	NA	NA	controlled	600	total_number	NA	NA	NA	NA	73.5	102.75	total_number	115.5	cm	NA	NA	Mercer, K. L., Emry, D. J., Snow, A. A., Kost, M. A., Pace, B. A., & Alexander, H. M. (2014). Fitness of crop-wild hybrid sunflower under competitive conditions: Implications for crop-to-wild introgression. PLoS ONE, 9(10). http://doi.org/10.1371/journal.pone.0109001
sunflower	59	Mercer_2014	444	helianthus_annuus	NA	hybrid	domNGE	NA	NA	controlled	250	total_number	NA	NA	NA	NA	68	NA	NA	43	cm	NA	NA	Mercer, K. L., Emry, D. J., Snow, A. A., Kost, M. A., Pace, B. A., & Alexander, H. M. (2014). Fitness of crop-wild hybrid sunflower under competitive conditions: Implications for crop-to-wild introgression. PLoS ONE, 9(10). http://doi.org/10.1371/journal.pone.0109001
sunflower	60	Owart_2014	445	helianthus_annuus	NA	hybrid	domNGE	NA	NA	controlled	NA	NA	NA	NA	NA	NA	NA	50	total_number	NA	NA	NA	NA	Owart, B. R., Corbi, J., Burke, J. M., & Dechaine, J. M. (2014). Selection on crop-derived traits and QTL in sunflower (Helianthus annuus) crop-wild hybrids under water stress. PLoS ONE, 9(7). http://doi.org/10.1371/journal.pone.0102717
sunflower	61	Presotto_2011	446	helianthus_annuus	HA89-HA425-SUB	commercial_line	domGE	IMI	1	controlled	NA	NA	NA	NA	NA	NA	NA	55	total_number	NA	NA	NA	NA	Presotto, A., Fernández-Moroni, I., Poverene, M., & Cantamutto, M. (2011). Sunflower crop-wild hybrids: Identification and risks. Crop Protection, 30, 611–616. http://doi.org/10.1016/j.cropro.2011.02.024
sunflower	61	Presotto_2011	447	helianthus_annuus	NA	commercial_line	domNGE	NA	NA	controlled	NA	NA	NA	NA	NA	NA	NA	130	total_number	NA	NA	NA	NA	Presotto, A., Fernández-Moroni, I., Poverene, M., & Cantamutto, M. (2011). Sunflower crop-wild hybrids: Identification and risks. Crop Protection, 30, 611–616. http://doi.org/10.1016/j.cropro.2011.02.022
sunflower	61	Presotto_2011	448	helianthus_annuus	NA	NA	wild	NA	NA	controlled	NA	NA	NA	NA	NA	NA	NA	35	total_number	NA	NA	NA	NA	Presotto, A., Fernández-Moroni, I., Poverene, M., & Cantamutto, M. (2011). Sunflower crop-wild hybrids: Identification and risks. Crop Protection, 30, 611–616. http://doi.org/10.1016/j.cropro.2011.02.023
sunflower	62	Presotto_2012	449	helianthus_annuus	NA	NA	wild	NA	NA	controlled	NA	NA	NA	NA	NA	NA	NA	40	total_number	NA	NA	NA	NA	Presotto, A., Soledad, M., Cantamutto, M., & Poverene, M. (2012). Agriculture , Ecosystems and Environment Effects of gene flow from IMI resistant sunflower crop to wild Helianthus annuus populations. “Agriculture, Ecosystems and Environment,” 146(1), 153–161. http://doi.org/10.1016/j.agee.2011.10.023
sunflower	62	Presotto_2012	450	helianthus_annuus	NA	hybrid	domNGE	NA	NA	controlled	NA	NA	NA	NA	NA	NA	NA	45	total_number	NA	NA	NA	NA	Presotto, A., Soledad, M., Cantamutto, M., & Poverene, M. (2012). Agriculture , Ecosystems and Environment Effects of gene flow from IMI resistant sunflower crop to wild Helianthus annuus populations. “Agriculture, Ecosystems and Environment,” 146(1), 153–161. http://doi.org/10.1016/j.agee.2011.10.023
sunflower	62	Presotto_2012	451	helianthus_annuus	NA	hybrid	domNGE	NA	NA	controlled	NA	NA	NA	NA	NA	NA	NA	20	total_number	NA	NA	NA	NA	Presotto, A., Soledad, M., Cantamutto, M., & Poverene, M. (2012). Agriculture , Ecosystems and Environment Effects of gene flow from IMI resistant sunflower crop to wild Helianthus annuus populations. “Agriculture, Ecosystems and Environment,” 146(1), 153–161. http://doi.org/10.1016/j.agee.2011.10.023
sunflower	62	Presotto_2012	452	helianthus_annuus	NA	hybrid	domNGE	ALS	1	controlled	NA	NA	NA	NA	NA	NA	NA	27	total_number	NA	NA	NA	NA	Presotto, A., Soledad, M., Cantamutto, M., & Poverene, M. (2012). Agriculture , Ecosystems and Environment Effects of gene flow from IMI resistant sunflower crop to wild Helianthus annuus populations. “Agriculture, Ecosystems and Environment,” 146(1), 153–161. http://doi.org/10.1016/j.agee.2011.10.023
sunflower	62	Presotto_2012	453	helianthus_annuus	IMI-R	commercial_line	domGE	ALS	1	controlled	NA	NA	NA	NA	NA	NA	21.7	6.1	total_number	NA	NA	NA	NA	Presotto, A., Soledad, M., Cantamutto, M., & Poverene, M. (2012). Agriculture , Ecosystems and Environment Effects of gene flow from IMI resistant sunflower crop to wild Helianthus annuus populations. “Agriculture, Ecosystems and Environment,” 146(1), 153–161. http://doi.org/10.1016/j.agee.2011.10.023
sunflower	63	Reagon_2006	454	helianthus_annuus	NA	NA	wild	NA	NA	controlled	NA	NA	NA	NA	NA	NA	20.5	5	total_number	NA	NA	NA	NA	Reagon, M., & Snow, A. A. (2006). Cultivated Helianthus annus (Asteraceae) volunteers as a genetic “bridge” to weedy sunflower populations in North America. American Journal of Botany, 93(1), 127–133. http://doi.org/10.3732/ajb.93.1.127
sunflower	63	Reagon_2006	455	helianthus_annuus	NA	NA	wild	NA	NA	field	NA	NA	NA	NA	NA	NA	16	15	total_number	NA	NA	NA	NA	Reagon, M., & Snow, A. A. (2006). Cultivated Helianthus annus (Asteraceae) volunteers as a genetic “bridge” to weedy sunflower populations in North America. American Journal of Botany, 93(1), 127–133. http://doi.org/10.3732/ajb.93.1.128
sunflower	64	Rosenthal_2002	456	helianthus_annuus	NA	NA	wild	NA	NA	controlled	NA	NA	NA	NA	NA	NA	17.8	12.4	total_number	NA	NA	NA	NA	Rosenthal, D. M., Schwarzbach, A. E., Donovan, L. A., Raymond, O., Rieseberg, L. H., Journal, I., … Rieseberg, L. H. (2002). Phenotypic Differentiation between Three Ancient Hybrid Taxa and Their Parental Species. International Journal of Plant Science, 163(3), 387–398.
sunflower	64	Rosenthal_2002	457	helianthus_petiolaris	NA	NA	wild	NA	NA	controlled	NA	NA	NA	NA	NA	NA	NA	75.6	total_number	157.8	cm	NA	NA	Rosenthal, D. M., Schwarzbach, A. E., Donovan, L. A., Raymond, O., Rieseberg, L. H., Journal, I., … Rieseberg, L. H. (2002). Phenotypic Differentiation between Three Ancient Hybrid Taxa and Their Parental Species. International Journal of Plant Science, 163(3), 387–398.
sunflower	64	Rosenthal_2002	458	helianthus_anomalus	NA	hybrid	domNGE	NA	NA	controlled	NA	NA	NA	NA	NA	NA	NA	33.67	total_number	134.33	cm	NA	NA	Rosenthal, D. M., Schwarzbach, A. E., Donovan, L. A., Raymond, O., Rieseberg, L. H., Journal, I., … Rieseberg, L. H. (2002). Phenotypic Differentiation between Three Ancient Hybrid Taxa and Their Parental Species. International Journal of Plant Science, 163(3), 387–398.
sunflower	64	Rosenthal_2002	459	helianthus_deserticola	NA	hybrid	domNGE	NA	NA	controlled	NA	NA	NA	NA	NA	NA	NA	1	total_number	108.8	cm	NA	NA	Rosenthal, D. M., Schwarzbach, A. E., Donovan, L. A., Raymond, O., Rieseberg, L. H., Journal, I., … Rieseberg, L. H. (2002). Phenotypic Differentiation between Three Ancient Hybrid Taxa and Their Parental Species. International Journal of Plant Science, 163(3), 387–398.
sunflower	64	Rosenthal_2002	460	helianthus_paradoxus	NA	hybrid	domNGE	NA	NA	controlled	NA	NA	NA	NA	NA	NA	NA	NA	NA	123.6	cm	NA	NA	Rosenthal, D. M., Schwarzbach, A. E., Donovan, L. A., Raymond, O., Rieseberg, L. H., Journal, I., … Rieseberg, L. H. (2002). Phenotypic Differentiation between Three Ancient Hybrid Taxa and Their Parental Species. International Journal of Plant Science, 163(3), 387–398.
sunflower	65	Snow_1998	461	helianthus_annuus	NA	NA	wild	NA	NA	controlled	21000	total_number	NA	NA	NA	NA	94.5	16.7	total_number	195	cm	NA	NA	Snow, A. A., Moran-Palma, P., Rieseberg, L. H., Wszelaki, A., & Seiler, G. J. (1998). Fecundity, phenology, and seed dormancy of F1 wild-crop hybrids in sunflower (Helianthus annus, Astereaceae). American Journal of Botany, 85(6), 794–801.
sunflower	65	Snow_1998	462	helianthus_annuus	Triumph_565	commercial_line	domNGE	NA	NA	controlled	7000	total_number	NA	NA	NA	NA	NA	11.7	total_number	NA	NA	NA	NA	Snow, A. A., Moran-Palma, P., Rieseberg, L. H., Wszelaki, A., & Seiler, G. J. (1998). Fecundity, phenology, and seed dormancy of F1 wild-crop hybrids in sunflower (Helianthus annus, Astereaceae). American Journal of Botany, 85(6), 794–801.
sunflower	65	Snow_1998	463	helianthus_annuus	USDA_894	commercial_line	domNGE	NA	NA	controlled	6000	total_number	NA	NA	NA	NA	NA	16	total_number	NA	NA	NA	NA	Snow, A. A., Moran-Palma, P., Rieseberg, L. H., Wszelaki, A., & Seiler, G. J. (1998). Fecundity, phenology, and seed dormancy of F1 wild-crop hybrids in sunflower (Helianthus annus, Astereaceae). American Journal of Botany, 85(6), 794–801.
sunflower	65	Snow_1998	464	helianthus_annuus	NA	NA	wild	NA	NA	controlled	3600	total_number	NA	NA	NA	NA	67	70.9	total_number	NA	NA	NA	NA	Snow, A. A., Moran-Palma, P., Rieseberg, L. H., Wszelaki, A., & Seiler, G. J. (1998). Fecundity, phenology, and seed dormancy of F1 wild-crop hybrids in sunflower (Helianthus annus, Astereaceae). American Journal of Botany, 85(6), 794–801.
sunflower	65	Snow_1998	465	helianthus_annuus	Triumph_565	commercial_line	domNGE	NA	NA	controlled	5100	total_number	NA	NA	NA	NA	60	125	total_number	237	cm	NA	NA	Snow, A. A., Moran-Palma, P., Rieseberg, L. H., Wszelaki, A., & Seiler, G. J. (1998). Fecundity, phenology, and seed dormancy of F1 wild-crop hybrids in sunflower (Helianthus annus, Astereaceae). American Journal of Botany, 85(6), 794–801.
sunflower	65	Snow_1998	466	helianthus_annuus	USDA_894	commercial_line	domNGE	NA	NA	controlled	5150	total_number	NA	NA	NA	NA	NA	121.4	total_number	NA	NA	NA	NA	Snow, A. A., Moran-Palma, P., Rieseberg, L. H., Wszelaki, A., & Seiler, G. J. (1998). Fecundity, phenology, and seed dormancy of F1 wild-crop hybrids in sunflower (Helianthus annus, Astereaceae). American Journal of Botany, 85(6), 794–801.
sunflower	65	Snow_1998	467	helianthus_annuus	NA	NA	wild	NA	NA	controlled	5050	total_number	NA	NA	NA	NA	72	1	total_number	131	cm	NA	NA	Snow, A. A., Moran-Palma, P., Rieseberg, L. H., Wszelaki, A., & Seiler, G. J. (1998). Fecundity, phenology, and seed dormancy of F1 wild-crop hybrids in sunflower (Helianthus annus, Astereaceae). American Journal of Botany, 85(6), 794–801.
sunflower	65	Snow_1998	468	helianthus_annuus	Triumph_565	commercial_line	domNGE	NA	NA	controlled	4000	total_number	NA	NA	NA	NA	70.75	102	total_number	100.75	cm	NA	NA	Snow, A. A., Moran-Palma, P., Rieseberg, L. H., Wszelaki, A., & Seiler, G. J. (1998). Fecundity, phenology, and seed dormancy of F1 wild-crop hybrids in sunflower (Helianthus annus, Astereaceae). American Journal of Botany, 85(6), 794–801.
sunflower	65	Snow_1998	469	helianthus_annuus	USDA_894	commercial_line	domNGE	NA	NA	controlled	4500	total_number	NA	NA	NA	NA	93.5	69.75	total_number	189.5	cm	NA	NA	Snow, A. A., Moran-Palma, P., Rieseberg, L. H., Wszelaki, A., & Seiler, G. J. (1998). Fecundity, phenology, and seed dormancy of F1 wild-crop hybrids in sunflower (Helianthus annus, Astereaceae). American Journal of Botany, 85(6), 794–801.
sunflower	66	Snow_2003	470	helianthus_annuus	CMS_PET1	commercial_line	domGE	cry1ab	2	controlled	909	total_number	NA	NA	NA	NA	NA	NA	NA	NA	NA	NA	NA	Snow, A. A., Pilson, D., Rieseberg, L. H., Paulsen, M. J., Pleskac, N., Reagon, M. R., Selbo, S. M. (2003). A Bt transgene reduces herbivory and enhances fecundity in wild sunflowers. Ecological Applications, 13(2), 279–286.
sunflower	66	Snow_2003	471	helianthus_annuus	NA	hybrid	domNGE	NA	NA	controlled	588	total_number	NA	NA	NA	NA	NA	NA	NA	NA	NA	NA	NA	Snow, A. A., Pilson, D., Rieseberg, L. H., Paulsen, M. J., Pleskac, N., Reagon, M. R., Selbo, S. M. (2003). A Bt transgene reduces herbivory and enhances fecundity in wild sunflowers. Ecological Applications, 13(2), 279–286.
sunflower	66	Snow_2003	472	helianthus_annuus	CMS_PET1	commercial_line	domGE	cry1ab	2	controlled	2077	total_number	NA	NA	NA	NA	83	80.3	total_number	NA	NA	NA	NA	Snow, A. A., Pilson, D., Rieseberg, L. H., Paulsen, M. J., Pleskac, N., Reagon, M. R., Selbo, S. M. (2003). A Bt transgene reduces herbivory and enhances fecundity in wild sunflowers. Ecological Applications, 13(2), 279–286.
sunflower	66	Snow_2003	473	helianthus_annuus	NA	hybrid	domNGE	NA	NA	controlled	1814	total_number	NA	NA	NA	NA	62	1	total_number	120	cm	NA	NA	Snow, A. A., Pilson, D., Rieseberg, L. H., Paulsen, M. J., Pleskac, N., Reagon, M. R., Selbo, S. M. (2003). A Bt transgene reduces herbivory and enhances fecundity in wild sunflowers. Ecological Applications, 13(2), 279–286.
sunflower	67	Ureta_2008	474	helianthus_annuus	NA	NA	wild	NA	NA	field	NA	NA	NA	NA	NA	NA	NA	NA	NA	132.1	cm	NA	NA	Ureta, M. ., Carrera, A. D., Cantamutto, M., & Poverene, M. (2008). Gene flow amonf wild and cultivated sunflower, Helianthus annus in Argentina. Agriculture, Ecosystems and Environment, 123, 343–349. http://doi.org/10.1016/j.agee.2007.07.008
sunflower	67	Ureta_2008	475	helianthus_annuus	NA	hybrid	domNGE	NA	NA	field	NA	NA	NA	NA	NA	NA	78	45.7	total_number	NA	NA	NA	NA	Ureta, M. ., Carrera, A. D., Cantamutto, M., & Poverene, M. (2008). Gene flow amonf wild and cultivated sunflower, Helianthus annus in Argentina. Agriculture, Ecosystems and Environment, 123, 343–349. http://doi.org/10.1016/j.agee.2007.07.007
sunflower	67	Ureta_2008	476	helianthus_annuus	NA	commercial_line	domNGE	NA	NA	field	NA	NA	NA	NA	NA	NA	68	11.4	total_number	NA	NA	NA	NA	Ureta, M. ., Carrera, A. D., Cantamutto, M., & Poverene, M. (2008). Gene flow amonf wild and cultivated sunflower, Helianthus annus in Argentina. Agriculture, Ecosystems and Environment, 123, 343–349. http://doi.org/10.1016/j.agee.2007.07.006
sunflower	68	Gutierrez_2011	477	helianthus_annuus	NA	NA	wild	NA	NA	controlled	11244	total_number	NA	NA	NA	NA	NA	NA	NA	NA	NA	NA	NA	Gutierrez, A., Cantamutto, M., & Poverene, M. (2011). Persistence of sunflower crop traits and fitness in Helianthus petiolaris populations. Plant Biology, 13, 821–830. http://doi.org/10.1111/j.1438-8677.2010.00433.x
sunflower	68	Gutierrez_2011	478	helianthus_spp	NA	hybrid	domNGE	NA	NA	controlled	9892	total_number	NA	NA	NA	NA	NA	NA	NA	NA	NA	NA	NA	Gutierrez, A., Cantamutto, M., & Poverene, M. (2011). Persistence of sunflower crop traits and fitness in Helianthus petiolaris populations. Plant Biology, 13, 821–830. http://doi.org/10.1111/j.1438-8677.2010.00433.x
sunflower	68	Gutierrez_2011	479	helianthus_spp	NA	NA	domNGE	NA	NA	controlled	NA	NA	NA	NA	NA	NA	NA	NA	NA	168.3	cm	NA	NA	Gutierrez, A., Cantamutto, M., & Poverene, M. (2011). Persistence of sunflower crop traits and fitness in Helianthus petiolaris populations. Plant Biology, 13, 821–830. http://doi.org/10.1111/j.1438-8677.2010.00433.x
sunflower	69	Wills_2007	480	helianthus_annuus	NA	NA	domNGE	NA	NA	controlled	NA	NA	NA	NA	NA	NA	100	NA	NA	358	cm	NA	NA	Wills, D. M., & Burke, J. M. (2007). Quantitative Trait Locus Analysis of the Early Domestication of Sunflower. Genetics, 176, 2589–2599. http://doi.org/10.1534/genetics.107.075333
sunflower	69	Wills_2007	481	helianthus_annuus	NA	NA	wild	NA	NA	controlled	NA	NA	NA	NA	NA	NA	84.8	NA	NA	171	cm	NA	NA	Wills, D. M., & Burke, J. M. (2007). Quantitative Trait Locus Analysis of the Early Domestication of Sunflower. Genetics, 176, 2589–2599. http://doi.org/10.1534/genetics.107.075333
sunflower	70	McAssey_2016	482	helianthus_annuus	NA	NA	wild	NA	NA	controlled	NA	NA	NA	NA	NA	NA	69.93	NA	NA	191.55	cm	NA	NA	McAssey, E. V, Corbi, J., & Burke, J. M. (2016). Range-wide phenotypic and genetic differentiation in wild sunflower. BMC Plant Biology, 16(249), 1–11. http://doi.org/10.1186/s12870-016-0937-7
sunflower	70	McAssey_2016	483	helianthus_annuus	NA	NA	wild	NA	NA	controlled	NA	NA	NA	NA	NA	NA	75.8	NA	NA	170.32	cm	NA	NA	McAssey, E. V, Corbi, J., & Burke, J. M. (2016). Range-wide phenotypic and genetic differentiation in wild sunflower. BMC Plant Biology, 16(249), 1–11. http://doi.org/10.1186/s12870-016-0937-7
sunflower	70	McAssey_2016	484	helianthus_annuus	NA	NA	wild	NA	NA	controlled	NA	NA	NA	NA	NA	NA	68.77	NA	NA	164.14	cm	NA	NA	McAssey, E. V, Corbi, J., & Burke, J. M. (2016). Range-wide phenotypic and genetic differentiation in wild sunflower. BMC Plant Biology, 16(249), 1–11. http://doi.org/10.1186/s12870-016-0937-7
sunflower	70	McAssey_2016	485	helianthus_annuus	NA	NA	wild	NA	NA	controlled	NA	NA	NA	NA	NA	NA	51.75	NA	NA	110.85	cm	NA	NA	McAssey, E. V, Corbi, J., & Burke, J. M. (2016). Range-wide phenotypic and genetic differentiation in wild sunflower. BMC Plant Biology, 16(249), 1–11. http://doi.org/10.1186/s12870-016-0937-7
sunflower	70	McAssey_2016	486	helianthus_annuus	NA	NA	wild	NA	NA	controlled	NA	NA	NA	NA	NA	NA	49.31	NA	NA	78.17	cm	NA	NA	McAssey, E. V, Corbi, J., & Burke, J. M. (2016). Range-wide phenotypic and genetic differentiation in wild sunflower. BMC Plant Biology, 16(249), 1–11. http://doi.org/10.1186/s12870-016-0937-7
sunflower	71	Silva_2007	487	helianthus_spp	H250	hybrid	domNGE	NA	NA	controlled	NA	NA	NA	NA	NA	NA	85	NA	NA	133	cm	NA	NA	Silva, M. D. L. O., Faria, M. A. De, Morais, A. R. De, Andrade, G. P., & Lima, E. M. D. C. (2007). Growth and productivity of sunflower cultivated in late summer and with different water depths. Revista Brasileira de Engenharia Agrícola E Ambiental, 11(5), 482–488.
sunflower	71	Silva_2007	488	helianthus_spp	H251	hybrid	domNGE	NA	NA	controlled	NA	NA	NA	NA	NA	NA	90	NA	NA	155	cm	NA	NA	Silva, M. D. L. O., Faria, M. A. De, Morais, A. R. De, Andrade, G. P., & Lima, E. M. D. C. (2007). Growth and productivity of sunflower cultivated in late summer and with different water depths. Revista Brasileira de Engenharia Agrícola E Ambiental, 11(5), 482–488.
sunflower	72	Pivetta_2012	489	helianthus_spp	H250	hybrid	domNGE	NA	NA	controlled	NA	NA	NA	NA	NA	NA	NA	NA	NA	157	cm	NA	NA	Pivetta, L. G., Guimarães, V. F., Fioreze, S. L., Augusto, L., & Castoldi, G. (2012). Evaluation of sunflower hybrids and the relationship between productive and qualitative parameters. Ciencia Agronomica, 43(3), 561–568.
sunflower	72	Pivetta_2012	490	helianthus_spp	H360	hybrid	domNGE	NA	NA	controlled	NA	NA	NA	NA	NA	NA	NA	NA	NA	162	cm	NA	NA	Pivetta, L. G., Guimarães, V. F., Fioreze, S. L., Augusto, L., & Castoldi, G. (2012). Evaluation of sunflower hybrids and the relationship between productive and qualitative parameters. Ciencia Agronomica, 43(3), 561–568.
sunflower	72	Pivetta_2012	491	helianthus_spp	H358	hybrid	domNGE	NA	NA	controlled	NA	NA	NA	NA	NA	NA	NA	NA	NA	166	cm	NA	NA	Pivetta, L. G., Guimarães, V. F., Fioreze, S. L., Augusto, L., & Castoldi, G. (2012). Evaluation of sunflower hybrids and the relationship between productive and qualitative parameters. Ciencia Agronomica, 43(3), 561–568.
sunflower	72	Pivetta_2012	492	helianthus_spp	MG2	hybrid	domNGE	NA	NA	controlled	NA	NA	NA	NA	NA	NA	NA	NA	NA	163	cm	NA	NA	Pivetta, L. G., Guimarães, V. F., Fioreze, S. L., Augusto, L., & Castoldi, G. (2012). Evaluation of sunflower hybrids and the relationship between productive and qualitative parameters. Ciencia Agronomica, 43(3), 561–568.
sunflower	72	Pivetta_2012	493	helianthus_spp	M734	hybrid	domNGE	NA	NA	controlled	NA	NA	NA	NA	NA	NA	NA	NA	NA	149	cm	NA	NA	Pivetta, L. G., Guimarães, V. F., Fioreze, S. L., Augusto, L., & Castoldi, G. (2012). Evaluation of sunflower hybrids and the relationship between productive and qualitative parameters. Ciencia Agronomica, 43(3), 561–568.
sunflower	72	Pivetta_2012	494	helianthus_spp	Aguara3	hybrid	domNGE	NA	NA	controlled	NA	NA	NA	NA	NA	NA	NA	NA	NA	149	cm	NA	NA	Pivetta, L. G., Guimarães, V. F., Fioreze, S. L., Augusto, L., & Castoldi, G. (2012). Evaluation of sunflower hybrids and the relationship between productive and qualitative parameters. Ciencia Agronomica, 43(3), 561–568.
sunflower	73	Backes_2008	495	helianthus_spp	Embrapa122	commercial_line	domNGE	NA	NA	controlled	NA	NA	NA	NA	NA	NA	50	NA	NA	178	cm	NA	NA	Backes, R. L., Souza, A. M. De, Balninot Junior, A. A., Galloti, G. J., & Bavaresco, A. (2008). Agronomic performance of sunflower cultivars in two planting dates in the north plateau of Santa Catarina state. Scientia Agraria, 9(1), 41–48.
sunflower	73	Backes_2008	496	helianthus_spp	Catissol	commercial_line	domNGE	NA	NA	controlled	NA	NA	NA	NA	NA	NA	57	NA	NA	216	cm	NA	NA	Backes, R. L., Souza, A. M. De, Balninot Junior, A. A., Galloti, G. J., & Bavaresco, A. (2008). Agronomic performance of sunflower cultivars in two planting dates in the north plateau of Santa Catarina state. Scientia Agraria, 9(1), 41–48.
sunflower	73	Backes_2008	497	helianthus_spp	IAC_larama	commercial_line	domNGE	NA	NA	controlled	NA	NA	NA	NA	NA	NA	59	NA	NA	213	cm	NA	NA	Backes, R. L., Souza, A. M. De, Balninot Junior, A. A., Galloti, G. J., & Bavaresco, A. (2008). Agronomic performance of sunflower cultivars in two planting dates in the north plateau of Santa Catarina state. Scientia Agraria, 9(1), 41–48.
sunflower	73	Backes_2008	498	helianthus_spp	DowM734	commercial_line	domNGE	NA	NA	controlled	NA	NA	NA	NA	NA	NA	63	NA	NA	222	cm	NA	NA	Backes, R. L., Souza, A. M. De, Balninot Junior, A. A., Galloti, G. J., & Bavaresco, A. (2008). Agronomic performance of sunflower cultivars in two planting dates in the north plateau of Santa Catarina state. Scientia Agraria, 9(1), 41–48.
sunflower	73	Backes_2008	499	helianthus_spp	Aguara3	commercial_line	domNGE	NA	NA	controlled	NA	NA	NA	NA	NA	NA	65	NA	NA	206	cm	NA	NA	Backes, R. L., Souza, A. M. De, Balninot Junior, A. A., Galloti, G. J., & Bavaresco, A. (2008). Agronomic performance of sunflower cultivars in two planting dates in the north plateau of Santa Catarina state. Scientia Agraria, 9(1), 41–48.
sunflower	73	Backes_2008	500	helianthus_spp	Aguara4	commercial_line	domNGE	NA	NA	controlled	NA	NA	NA	NA	NA	NA	61	NA	NA	211	cm	NA	NA	Backes, R. L., Souza, A. M. De, Balninot Junior, A. A., Galloti, G. J., & Bavaresco, A. (2008). Agronomic performance of sunflower cultivars in two planting dates in the north plateau of Santa Catarina state. Scientia Agraria, 9(1), 41–48.
sunflower	73	Backes_2008	501	helianthus_spp	Helio250	commercial_line	domNGE	NA	NA	controlled	NA	NA	NA	NA	NA	NA	57	NA	NA	181	cm	NA	NA	Backes, R. L., Souza, A. M. De, Balninot Junior, A. A., Galloti, G. J., & Bavaresco, A. (2008). Agronomic performance of sunflower cultivars in two planting dates in the north plateau of Santa Catarina state. Scientia Agraria, 9(1), 41–48.
sunflower	73	Backes_2008	502	helianthus_spp	Helio251	commercial_line	domNGE	NA	NA	controlled	NA	NA	NA	NA	NA	NA	65	NA	NA	201	cm	NA	NA	Backes, R. L., Souza, A. M. De, Balninot Junior, A. A., Galloti, G. J., & Bavaresco, A. (2008). Agronomic performance of sunflower cultivars in two planting dates in the north plateau of Santa Catarina state. Scientia Agraria, 9(1), 41–48.
sunflower	73	Backes_2008	503	helianthus_spp	Helio358	commercial_line	domNGE	NA	NA	controlled	NA	NA	NA	NA	NA	NA	59	NA	NA	204	cm	NA	NA	Backes, R. L., Souza, A. M. De, Balninot Junior, A. A., Galloti, G. J., & Bavaresco, A. (2008). Agronomic performance of sunflower cultivars in two planting dates in the north plateau of Santa Catarina state. Scientia Agraria, 9(1), 41–48.
sunflower	73	Backes_2008	504	helianthus_spp	Helio360	commercial_line	domNGE	NA	NA	controlled	NA	NA	NA	NA	NA	NA	65	NA	NA	209	cm	NA	NA	Backes, R. L., Souza, A. M. De, Balninot Junior, A. A., Galloti, G. J., & Bavaresco, A. (2008). Agronomic performance of sunflower cultivars in two planting dates in the north plateau of Santa Catarina state. Scientia Agraria, 9(1), 41–48.
sunflower	73	Backes_2008	505	helianthus_spp	Agrobel960	commercial_line	domNGE	NA	NA	controlled	NA	NA	NA	NA	NA	NA	61	NA	NA	196	cm	NA	NA	Backes, R. L., Souza, A. M. De, Balninot Junior, A. A., Galloti, G. J., & Bavaresco, A. (2008). Agronomic performance of sunflower cultivars in two planting dates in the north plateau of Santa Catarina state. Scientia Agraria, 9(1), 41–48.
sunflower	73	Backes_2008	506	helianthus_spp	Charrua	commercial_line	domNGE	NA	NA	controlled	NA	NA	NA	NA	NA	NA	65	NA	NA	216	cm	NA	NA	Backes, R. L., Souza, A. M. De, Balninot Junior, A. A., Galloti, G. J., & Bavaresco, A. (2008). Agronomic performance of sunflower cultivars in two planting dates in the north plateau of Santa Catarina state. Scientia Agraria, 9(1), 41–48.
sunflower	73	Backes_2008	507	helianthus_spp	DowM734	commercial_line	domNGE	NA	NA	controlled	NA	NA	NA	NA	NA	NA	63	NA	NA	222	cm	NA	NA	Backes, R. L., Souza, A. M. De, Balninot Junior, A. A., Galloti, G. J., & Bavaresco, A. (2008). Agronomic performance of sunflower cultivars in two planting dates in the north plateau of Santa Catarina state. Scientia Agraria, 9(1), 41–48.
sunflower	73	Backes_2008	508	helianthus_spp	Embrapa122	commercial_line	domNGE	NA	NA	controlled	NA	NA	NA	NA	NA	NA	63	NA	NA	NA	NA	NA	NA	Backes, R. L., Souza, A. M. De, Balninot Junior, A. A., Galloti, G. J., & Bavaresco, A. (2008). Agronomic performance of sunflower cultivars in two planting dates in the north plateau of Santa Catarina state. Scientia Agraria, 9(1), 41–48.
sunflower	73	Backes_2008	509	helianthus_spp	Catissol	commercial_line	domNGE	NA	NA	controlled	NA	NA	NA	NA	NA	NA	68	NA	NA	NA	NA	NA	NA	Backes, R. L., Souza, A. M. De, Balninot Junior, A. A., Galloti, G. J., & Bavaresco, A. (2008). Agronomic performance of sunflower cultivars in two planting dates in the north plateau of Santa Catarina state. Scientia Agraria, 9(1), 41–48.
sunflower	73	Backes_2008	510	helianthus_spp	IAC_larama	commercial_line	domNGE	NA	NA	controlled	NA	NA	NA	NA	NA	NA	69	NA	NA	NA	NA	NA	NA	Backes, R. L., Souza, A. M. De, Balninot Junior, A. A., Galloti, G. J., & Bavaresco, A. (2008). Agronomic performance of sunflower cultivars in two planting dates in the north plateau of Santa Catarina state. Scientia Agraria, 9(1), 41–48.
sunflower	73	Backes_2008	511	helianthus_spp	DowM734	commercial_line	domNGE	NA	NA	controlled	NA	NA	NA	NA	NA	NA	71	NA	NA	NA	NA	NA	NA	Backes, R. L., Souza, A. M. De, Balninot Junior, A. A., Galloti, G. J., & Bavaresco, A. (2008). Agronomic performance of sunflower cultivars in two planting dates in the north plateau of Santa Catarina state. Scientia Agraria, 9(1), 41–48.
sunflower	73	Backes_2008	512	helianthus_spp	Aguara3	commercial_line	domNGE	NA	NA	controlled	NA	NA	NA	NA	NA	NA	68	NA	NA	NA	NA	NA	NA	Backes, R. L., Souza, A. M. De, Balninot Junior, A. A., Galloti, G. J., & Bavaresco, A. (2008). Agronomic performance of sunflower cultivars in two planting dates in the north plateau of Santa Catarina state. Scientia Agraria, 9(1), 41–48.
sunflower	73	Backes_2008	513	helianthus_spp	Aguara4	commercial_line	domNGE	NA	NA	controlled	NA	NA	NA	NA	NA	NA	68	NA	NA	NA	NA	NA	NA	Backes, R. L., Souza, A. M. De, Balninot Junior, A. A., Galloti, G. J., & Bavaresco, A. (2008). Agronomic performance of sunflower cultivars in two planting dates in the north plateau of Santa Catarina state. Scientia Agraria, 9(1), 41–48.
sunflower	73	Backes_2008	514	helianthus_spp	Helio250	commercial_line	domNGE	NA	NA	controlled	NA	NA	NA	NA	NA	NA	65	NA	NA	NA	NA	NA	NA	Backes, R. L., Souza, A. M. De, Balninot Junior, A. A., Galloti, G. J., & Bavaresco, A. (2008). Agronomic performance of sunflower cultivars in two planting dates in the north plateau of Santa Catarina state. Scientia Agraria, 9(1), 41–48.
sunflower	73	Backes_2008	515	helianthus_spp	Helio251	commercial_line	domNGE	NA	NA	controlled	NA	NA	NA	NA	NA	NA	72	NA	NA	NA	NA	NA	NA	Backes, R. L., Souza, A. M. De, Balninot Junior, A. A., Galloti, G. J., & Bavaresco, A. (2008). Agronomic performance of sunflower cultivars in two planting dates in the north plateau of Santa Catarina state. Scientia Agraria, 9(1), 41–48.
sunflower	73	Backes_2008	516	helianthus_spp	Helio358	commercial_line	domNGE	NA	NA	controlled	NA	NA	NA	NA	NA	NA	67	NA	NA	NA	NA	NA	NA	Backes, R. L., Souza, A. M. De, Balninot Junior, A. A., Galloti, G. J., & Bavaresco, A. (2008). Agronomic performance of sunflower cultivars in two planting dates in the north plateau of Santa Catarina state. Scientia Agraria, 9(1), 41–48.
sunflower	73	Backes_2008	517	helianthus_spp	Helio360	commercial_line	domNGE	NA	NA	controlled	NA	NA	NA	NA	NA	NA	69	NA	NA	NA	NA	NA	NA	Backes, R. L., Souza, A. M. De, Balninot Junior, A. A., Galloti, G. J., & Bavaresco, A. (2008). Agronomic performance of sunflower cultivars in two planting dates in the north plateau of Santa Catarina state. Scientia Agraria, 9(1), 41–48.
sunflower	73	Backes_2008	518	helianthus_spp	Agrobel960	commercial_line	domNGE	NA	NA	controlled	NA	NA	NA	NA	NA	NA	69	NA	NA	NA	NA	NA	NA	Backes, R. L., Souza, A. M. De, Balninot Junior, A. A., Galloti, G. J., & Bavaresco, A. (2008). Agronomic performance of sunflower cultivars in two planting dates in the north plateau of Santa Catarina state. Scientia Agraria, 9(1), 41–48.
sunflower	73	Backes_2008	519	helianthus_spp	Charrua	commercial_line	domNGE	NA	NA	controlled	NA	NA	NA	NA	NA	NA	72	NA	NA	NA	NA	NA	NA	Backes, R. L., Souza, A. M. De, Balninot Junior, A. A., Galloti, G. J., & Bavaresco, A. (2008). Agronomic performance of sunflower cultivars in two planting dates in the north plateau of Santa Catarina state. Scientia Agraria, 9(1), 41–48.
sunflower	73	Backes_2008	520	helianthus_spp	DowM734	commercial_line	domNGE	NA	NA	controlled	NA	NA	NA	NA	NA	NA	71	NA	NA	NA	NA	NA	NA	Backes, R. L., Souza, A. M. De, Balninot Junior, A. A., Galloti, G. J., & Bavaresco, A. (2008). Agronomic performance of sunflower cultivars in two planting dates in the north plateau of Santa Catarina state. Scientia Agraria, 9(1), 41–48.
sunflower	74	Birck_2016	521	helianthus_spp	Aguara06	commercial_line	domNGE	NA	NA	controlled	NA	NA	NA	NA	NA	NA	NA	NA	NA	175.6	cm	NA	NA	Birck, M., Dalchiavon, F. C., Stasiak, D., Silva locca, A. F., Hiolanda, R., & Carvalho, C. G. (2016). Performance of sunflower cultivars at different seeding periods in central Brazil. Ciencia E Agrotecnologia, 41(1), 42–51.
sunflower	74	Birck_2016	522	helianthus_spp	NEON	commercial_line	domNGE	NA	NA	controlled	NA	NA	NA	NA	NA	NA	NA	NA	NA	205.4	cm	NA	NA	Birck, M., Dalchiavon, F. C., Stasiak, D., Silva locca, A. F., Hiolanda, R., & Carvalho, C. G. (2016). Performance of sunflower cultivars at different seeding periods in central Brazil. Ciencia E Agrotecnologia, 41(1), 42–51.
sunflower	74	Birck_2016	523	helianthus_spp	Aguara04	commercial_line	domNGE	NA	NA	controlled	NA	NA	NA	NA	NA	NA	NA	NA	NA	168.4	cm	NA	NA	Birck, M., Dalchiavon, F. C., Stasiak, D., Silva locca, A. F., Hiolanda, R., & Carvalho, C. G. (2016). Performance of sunflower cultivars at different seeding periods in central Brazil. Ciencia E Agrotecnologia, 41(1), 42–51.
sunflower	74	Birck_2016	524	helianthus_spp	MG305	commercial_line	domNGE	NA	NA	controlled	NA	NA	NA	NA	NA	NA	NA	NA	NA	189.8	cm	NA	NA	Birck, M., Dalchiavon, F. C., Stasiak, D., Silva locca, A. F., Hiolanda, R., & Carvalho, C. G. (2016). Performance of sunflower cultivars at different seeding periods in central Brazil. Ciencia E Agrotecnologia, 41(1), 42–51.
sunflower	74	Birck_2016	525	helianthus_spp	CF101	commercial_line	domNGE	NA	NA	controlled	NA	NA	NA	NA	NA	NA	NA	NA	NA	144.6	cm	NA	NA	Birck, M., Dalchiavon, F. C., Stasiak, D., Silva locca, A. F., Hiolanda, R., & Carvalho, C. G. (2016). Performance of sunflower cultivars at different seeding periods in central Brazil. Ciencia E Agrotecnologia, 41(1), 42–51.
sunflower	74	Birck_2016	526	helianthus_spp	SYN3950HO	commercial_line	domNGE	NA	NA	controlled	NA	NA	NA	NA	NA	NA	NA	NA	NA	183.5	cm	NA	NA	Birck, M., Dalchiavon, F. C., Stasiak, D., Silva locca, A. F., Hiolanda, R., & Carvalho, C. G. (2016). Performance of sunflower cultivars at different seeding periods in central Brazil. Ciencia E Agrotecnologia, 41(1), 42–51.
sunflower	74	Birck_2016	527	helianthus_spp	SYN045	commercial_line	domNGE	NA	NA	controlled	NA	NA	NA	NA	NA	NA	NA	NA	NA	178	cm	NA	NA	Birck, M., Dalchiavon, F. C., Stasiak, D., Silva locca, A. F., Hiolanda, R., & Carvalho, C. G. (2016). Performance of sunflower cultivars at different seeding periods in central Brazil. Ciencia E Agrotecnologia, 41(1), 42–51.
sunflower	74	Birck_2016	528	helianthus_spp	Helio251	commercial_line	domNGE	NA	NA	controlled	NA	NA	NA	NA	NA	NA	NA	NA	NA	190.8	cm	NA	NA	Birck, M., Dalchiavon, F. C., Stasiak, D., Silva locca, A. F., Hiolanda, R., & Carvalho, C. G. (2016). Performance of sunflower cultivars at different seeding periods in central Brazil. Ciencia E Agrotecnologia, 41(1), 42–51.
pumpkin	75	Cruz-Reyes_2015	529	cucurbita_spp_argyrosperma	NA	NA	wild	NA	NA	controlled	5609	total_number	NA	NA	NA	NA	NA	NA	NA	NA	NA	NA	NA	Cruz-Reyes, R., Ávila-Sakar, G., Sánchez-Montoya, G., & Quesada, M. (2015). Experimental assessment of gene flow between transgenic squash and a wild relative in the center of origin of cucurbits. Ecosphere, 6, 1–13.
pumpkin	75	Cruz-Reyes_2015	530	cucurbita_spp_pepo	Liberator_III	commercial_line	domGE	VRT	3	controlled	NA	NA	NA	NA	NA	NA	NA	NA	NA	NA	NA	NA	NA	Cruz-Reyes, R., Ávila-Sakar, G., Sánchez-Montoya, G., & Quesada, M. (2015). Experimental assessment of gene flow between transgenic squash and a wild relative in the center of origin of cucurbits. Ecosphere, 6, 1–13.
pumpkin	75	Cruz-Reyes_2015	531	cucurbita_spp	NA	hybrid	domNGE	VRT	3	controlled	1935	total_number	NA	NA	NA	NA	NA	NA	NA	NA	NA	NA	NA	Cruz-Reyes, R., Ávila-Sakar, G., Sánchez-Montoya, G., & Quesada, M. (2015). Experimental assessment of gene flow between transgenic squash and a wild relative in the center of origin of cucurbits. Ecosphere, 6, 1–13.
pumpkin	76	Laughlin_2009	532	cucurbita_spp_pepo	NA	NA	wild	NA	NA	controlled	11000	total_number	NA	NA	NA	NA	NA	190	total_number	NA	NA	120	total_number	Laughlin, K. D., Power, A. G., Snow, A. A., & Spencer, L. J. (2009). Risk assessment of genetically engineered crops : fitness effects of virus-resistance transgenes in wild Cucurbita pepo. Ecological Applications, 19(5), 1091–1101.
pumpkin	76	Laughlin_2009	533	cucurbita_spp_pepo	NA	NA	wild	NA	NA	controlled	4000	total_number	NA	NA	NA	NA	NA	55	total_number	NA	NA	40	total_number	Laughlin, K. D., Power, A. G., Snow, A. A., & Spencer, L. J. (2009). Risk assessment of genetically engineered crops : fitness effects of virus-resistance transgenes in wild Cucurbita pepo. Ecological Applications, 19(5), 1091–1101.
pumpkin	76	Laughlin_2009	534	cucurbita_spp_pepo	CZW_3	hybrid	domNGE	NA	NA	controlled	11500	total_number	NA	NA	NA	NA	NA	165	total_number	NA	NA	75	total_number	Laughlin, K. D., Power, A. G., Snow, A. A., & Spencer, L. J. (2009). Risk assessment of genetically engineered crops : fitness effects of virus-resistance transgenes in wild Cucurbita pepo. Ecological Applications, 19(5), 1091–1101.
pumpkin	76	Laughlin_2009	535	cucurbita_spp_pepo	CZW_3	hybrid	domNGE	NA	NA	controlled	4000	total_number	NA	NA	NA	NA	NA	40	total_number	NA	NA	35	total_number	Laughlin, K. D., Power, A. G., Snow, A. A., & Spencer, L. J. (2009). Risk assessment of genetically engineered crops : fitness effects of virus-resistance transgenes in wild Cucurbita pepo. Ecological Applications, 19(5), 1091–1101.
pumpkin	76	Laughlin_2009	536	cucurbita_spp_pepo	CZW_3	hybrid	domGE	VRT	3	controlled	9000	total_number	NA	NA	NA	NA	NA	160	total_number	NA	NA	85	total_number	Laughlin, K. D., Power, A. G., Snow, A. A., & Spencer, L. J. (2009). Risk assessment of genetically engineered crops : fitness effects of virus-resistance transgenes in wild Cucurbita pepo. Ecological Applications, 19(5), 1091–1101.
pumpkin	76	Laughlin_2009	537	cucurbita_spp_pepo	CZW_3	hybrid	domGE	VRT	3	controlled	4200	total_number	NA	NA	NA	NA	NA	45	total_number	NA	NA	41	total_number	Laughlin, K. D., Power, A. G., Snow, A. A., & Spencer, L. J. (2009). Risk assessment of genetically engineered crops : fitness effects of virus-resistance transgenes in wild Cucurbita pepo. Ecological Applications, 19(5), 1091–1101.
pumpkin	77	Spencer_2001	538	cucurbita_spp_pepo	Freedom_II	hybrid	domGE	ZYMV_WMV2	3	controlled	4197	total_number	NA	NA	NA	NA	NA	NA	NA	NA	NA	14.9	total_number	Spencer, L. J., & Snow, A. A. (2001). Fecundity of transgenic wild ± crop hybrids of Cucurbita pepo ( Cucurbitaceae ): implications for crop-to-wild gene ¯ ow. Heredity, 86, 694–703.
pumpkin	77	Spencer_2001	539	cucurbita_spp_pepo	NA	NA	wild	NA	NA	controlled	15982	total_number	NA	NA	NA	NA	NA	NA	NA	NA	NA	88.3	total_number	Spencer, L. J., & Snow, A. A. (2001). Fecundity of transgenic wild ± crop hybrids of Cucurbita pepo ( Cucurbitaceae ): implications for crop-to-wild gene ¯ ow. Heredity, 86, 694–703.
pumpkin	77	Spencer_2001	540	cucurbita_spp_pepo	Freedom_II	hybrid	domGE	ZYMV_WMV2	3	controlled	612	total_number	NA	NA	NA	NA	NA	NA	NA	NA	NA	3.6	total_number	Spencer, L. J., & Snow, A. A. (2001). Fecundity of transgenic wild ± crop hybrids of Cucurbita pepo ( Cucurbitaceae ): implications for crop-to-wild gene ¯ ow. Heredity, 86, 694–703.
pumpkin	77	Spencer_2001	541	cucurbita_spp_pepo	NA	NA	wild	NA	NA	controlled	1441	total_number	NA	NA	NA	NA	NA	NA	NA	NA	NA	15.1	total_number	Spencer, L. J., & Snow, A. A. (2001). Fecundity of transgenic wild ± crop hybrids of Cucurbita pepo ( Cucurbitaceae ): implications for crop-to-wild gene ¯ ow. Heredity, 86, 694–703.
pumpkin	77	Spencer_2001	542	cucurbita_spp_pepo	Freedom_II	hybrid	domGE	ZYMV_WMV2	3	controlled	638	total_number	NA	NA	NA	NA	NA	NA	NA	NA	NA	2.9	total_number	Spencer, L. J., & Snow, A. A. (2001). Fecundity of transgenic wild ± crop hybrids of Cucurbita pepo ( Cucurbitaceae ): implications for crop-to-wild gene ¯ ow. Heredity, 86, 694–703.
pumpkin	77	Spencer_2001	543	cucurbita_spp_pepo	NA	NA	wild	NA	NA	controlled	3422	total_number	NA	NA	NA	NA	NA	NA	NA	NA	NA	25.4	total_number	Spencer, L. J., & Snow, A. A. (2001). Fecundity of transgenic wild ± crop hybrids of Cucurbita pepo ( Cucurbitaceae ): implications for crop-to-wild gene ¯ ow. Heredity, 86, 694–703.
pumpkin	77	Spencer_2001	544	cucurbita_spp_pepo	Freedom_II	hybrid	domGE	ZYMV_WMV2	3	controlled	2697	total_number	NA	NA	NA	NA	NA	NA	NA	NA	NA	10	total_number	Spencer, L. J., & Snow, A. A. (2001). Fecundity of transgenic wild ± crop hybrids of Cucurbita pepo ( Cucurbitaceae ): implications for crop-to-wild gene ¯ ow. Heredity, 86, 694–703.
pumpkin	77	Spencer_2001	545	cucurbita_spp_pepo	NA	NA	wild	NA	NA	controlled	17557	total_number	NA	NA	NA	NA	NA	NA	NA	NA	NA	101	total_number	Spencer, L. J., & Snow, A. A. (2001). Fecundity of transgenic wild ± crop hybrids of Cucurbita pepo ( Cucurbitaceae ): implications for crop-to-wild gene ¯ ow. Heredity, 86, 694–703.
pumpkin	77	Spencer_2001	546	cucurbita_spp_pepo	Freedom_II	hybrid	domGE	ZYMV_WMV2	3	controlled	453	total_number	NA	NA	NA	NA	NA	NA	NA	NA	NA	2.8	total_number	Spencer, L. J., & Snow, A. A. (2001). Fecundity of transgenic wild ± crop hybrids of Cucurbita pepo ( Cucurbitaceae ): implications for crop-to-wild gene ¯ ow. Heredity, 86, 694–703.
pumpkin	77	Spencer_2001	547	cucurbita_spp_pepo	NA	NA	wild	NA	NA	controlled	1223	total_number	NA	NA	NA	NA	NA	NA	NA	NA	NA	10.4	total_number	Spencer, L. J., & Snow, A. A. (2001). Fecundity of transgenic wild ± crop hybrids of Cucurbita pepo ( Cucurbitaceae ): implications for crop-to-wild gene ¯ ow. Heredity, 86, 694–703.
pumpkin	77	Spencer_2001	548	cucurbita_spp_pepo	Freedom_II	hybrid	domGE	ZYMV_WMV2	3	controlled	1231	total_number	NA	NA	NA	NA	NA	NA	NA	NA	NA	7.9	total_number	Spencer, L. J., & Snow, A. A. (2001). Fecundity of transgenic wild ± crop hybrids of Cucurbita pepo ( Cucurbitaceae ): implications for crop-to-wild gene ¯ ow. Heredity, 86, 694–703.
pumpkin	77	Spencer_2001	549	cucurbita_spp_pepo	NA	NA	wild	NA	NA	controlled	2342	total_number	NA	NA	NA	NA	NA	NA	NA	NA	NA	20.9	total_number	Spencer, L. J., & Snow, A. A. (2001). Fecundity of transgenic wild ± crop hybrids of Cucurbita pepo ( Cucurbitaceae ): implications for crop-to-wild gene ¯ ow. Heredity, 86, 694–703.
pumpkin	78	Fuchs_2004	550	cucurbita_spp_texana	NA	NA	wild	NA	NA	controlled	800	total_number	NA	NA	NA	NA	NA	NA	NA	NA	NA	5	total_number	Fuchs, M., Chirco, E. M., Mcferson, J. R., & Gonsalves, D. (2004). Comparative fitness of a wild squash species and three generations of hybrids between wild × virus-resistant transgenic squash. Environmental Biosafety, 3, 17–28. http://doi.org/10.1051/ebr:2004004
pumpkin	78	Fuchs_2004	551	cucurbita_spp	NA	hybrid	domNGE	NA	NA	controlled	500	total_number	NA	NA	NA	NA	NA	NA	NA	NA	NA	3	total_number	Fuchs, M., Chirco, E. M., Mcferson, J. R., & Gonsalves, D. (2004). Comparative fitness of a wild squash species and three generations of hybrids between wild × virus-resistant transgenic squash. Environmental Biosafety, 3, 17–28. http://doi.org/10.1051/ebr:2004004
pumpkin	78	Fuchs_2004	552	cucurbita_spp	NA	hybrid	domNGE	NA	NA	controlled	1100	total_number	NA	NA	NA	NA	NA	NA	NA	NA	NA	7	total_number	Fuchs, M., Chirco, E. M., Mcferson, J. R., & Gonsalves, D. (2004). Comparative fitness of a wild squash species and three generations of hybrids between wild × virus-resistant transgenic squash. Environmental Biosafety, 3, 17–28. http://doi.org/10.1051/ebr:2004004
pumpkin	78	Fuchs_2004	553	cucurbita_spp	NA	hybrid	domNGE	NA	NA	controlled	700	total_number	NA	NA	NA	NA	NA	NA	NA	NA	NA	5	total_number	Fuchs, M., Chirco, E. M., Mcferson, J. R., & Gonsalves, D. (2004). Comparative fitness of a wild squash species and three generations of hybrids between wild × virus-resistant transgenic squash. Environmental Biosafety, 3, 17–28. http://doi.org/10.1051/ebr:2004004
pumpkin	78	Fuchs_2004	554	cucurbita_spp_pepo	CZW_3	commercial_line	domGE	CMV_ZYMV_WMV	3	controlled	500	total_number	NA	NA	NA	NA	NA	NA	NA	NA	NA	2	total_number	Fuchs, M., Chirco, E. M., Mcferson, J. R., & Gonsalves, D. (2004). Comparative fitness of a wild squash species and three generations of hybrids between wild × virus-resistant transgenic squash. Environmental Biosafety, 3, 17–28. http://doi.org/10.1051/ebr:2004004
pumpkin	78	Fuchs_2004	555	cucurbita_spp	NA	hybrid	domGE	CMV_ZYMV_WMV	3	controlled	2300	total_number	NA	NA	NA	NA	NA	NA	NA	NA	NA	8	total_number	Fuchs, M., Chirco, E. M., Mcferson, J. R., & Gonsalves, D. (2004). Comparative fitness of a wild squash species and three generations of hybrids between wild × virus-resistant transgenic squash. Environmental Biosafety, 3, 17–28. http://doi.org/10.1051/ebr:2004004
pumpkin	78	Fuchs_2004	556	cucurbita_spp	NA	hybrid	domGE	CMV_ZYMV_WMV	3	controlled	4500	total_number	NA	NA	NA	NA	NA	NA	NA	NA	NA	13	total_number	Fuchs, M., Chirco, E. M., Mcferson, J. R., & Gonsalves, D. (2004). Comparative fitness of a wild squash species and three generations of hybrids between wild × virus-resistant transgenic squash. Environmental Biosafety, 3, 17–28. http://doi.org/10.1051/ebr:2004004
pumpkin	78	Fuchs_2004	557	cucurbita_spp	NA	hybrid	domGE	CMV_ZYMV_WMV	3	controlled	4200	total_number	NA	NA	NA	NA	NA	NA	NA	NA	NA	4	total_number	Fuchs, M., Chirco, E. M., Mcferson, J. R., & Gonsalves, D. (2004). Comparative fitness of a wild squash species and three generations of hybrids between wild × virus-resistant transgenic squash. Environmental Biosafety, 3, 17–28. http://doi.org/10.1051/ebr:2004004
pumpkin	78	Fuchs_2004	558	cucurbita_spp_texana	NA	NA	wild	NA	NA	controlled	5100	total_number	NA	NA	NA	NA	NA	NA	NA	NA	NA	18	total_number	Fuchs, M., Chirco, E. M., Mcferson, J. R., & Gonsalves, D. (2004). Comparative fitness of a wild squash species and three generations of hybrids between wild × virus-resistant transgenic squash. Environmental Biosafety, 3, 17–28. http://doi.org/10.1051/ebr:2004004
pumpkin	78	Fuchs_2004	559	cucurbita_spp	NA	hybrid	domNGE	NA	NA	controlled	2800	total_number	NA	NA	NA	NA	NA	NA	NA	NA	NA	8	total_number	Fuchs, M., Chirco, E. M., Mcferson, J. R., & Gonsalves, D. (2004). Comparative fitness of a wild squash species and three generations of hybrids between wild × virus-resistant transgenic squash. Environmental Biosafety, 3, 17–28. http://doi.org/10.1051/ebr:2004004
pumpkin	78	Fuchs_2004	560	cucurbita_spp	NA	hybrid	domNGE	NA	NA	controlled	4900	total_number	NA	NA	NA	NA	NA	NA	NA	NA	NA	14	total_number	Fuchs, M., Chirco, E. M., Mcferson, J. R., & Gonsalves, D. (2004). Comparative fitness of a wild squash species and three generations of hybrids between wild × virus-resistant transgenic squash. Environmental Biosafety, 3, 17–28. http://doi.org/10.1051/ebr:2004004
pumpkin	78	Fuchs_2004	561	cucurbita_spp	NA	hybrid	domNGE	NA	NA	controlled	4000	total_number	NA	NA	NA	NA	NA	NA	NA	NA	NA	16	total_number	Fuchs, M., Chirco, E. M., Mcferson, J. R., & Gonsalves, D. (2004). Comparative fitness of a wild squash species and three generations of hybrids between wild × virus-resistant transgenic squash. Environmental Biosafety, 3, 17–28. http://doi.org/10.1051/ebr:2004004
pumpkin	78	Fuchs_2004	562	cucurbita_spp_pepo	CZW_3	commercial_line	domGE	CMV_ZYMV_WMV	3	controlled	NA	total_number	NA	NA	NA	NA	NA	NA	NA	NA	NA	NA	NA	Fuchs, M., Chirco, E. M., Mcferson, J. R., & Gonsalves, D. (2004). Comparative fitness of a wild squash species and three generations of hybrids between wild × virus-resistant transgenic squash. Environmental Biosafety, 3, 17–28. http://doi.org/10.1051/ebr:2004004
pumpkin	78	Fuchs_2004	563	cucurbita_spp	NA	hybrid	domGE	CMV_ZYMV_WMV	3	controlled	3100	total_number	NA	NA	NA	NA	NA	NA	NA	NA	NA	9	total_number	Fuchs, M., Chirco, E. M., Mcferson, J. R., & Gonsalves, D. (2004). Comparative fitness of a wild squash species and three generations of hybrids between wild × virus-resistant transgenic squash. Environmental Biosafety, 3, 17–28. http://doi.org/10.1051/ebr:2004004
pumpkin	78	Fuchs_2004	564	cucurbita_spp	NA	hybrid	domGE	CMV_ZYMV_WMV	3	controlled	5000	total_number	NA	NA	NA	NA	NA	NA	NA	NA	NA	14	total_number	Fuchs, M., Chirco, E. M., Mcferson, J. R., & Gonsalves, D. (2004). Comparative fitness of a wild squash species and three generations of hybrids between wild × virus-resistant transgenic squash. Environmental Biosafety, 3, 17–28. http://doi.org/10.1051/ebr:2004004
pumpkin	78	Fuchs_2004	565	cucurbita_spp	NA	hybrid	domGE	CMV_ZYMV_WMV	3	controlled	4700	total_number	NA	NA	NA	NA	NA	NA	NA	NA	NA	15	total_number	Fuchs, M., Chirco, E. M., Mcferson, J. R., & Gonsalves, D. (2004). Comparative fitness of a wild squash species and three generations of hybrids between wild × virus-resistant transgenic squash. Environmental Biosafety, 3, 17–28. http://doi.org/10.1051/ebr:2004004
pumpkin	79	Schlichting_1990	566	cucurbita_spp_pepo	NA	hybrid	domNGE	NA	NA	controlled	2073	total_number	NA	NA	NA	NA	NA	NA	NA	NA	NA	16	total_number	Schlichting, C. D., Stephenson, A. G., Small, L. E., & James, A. (1990). Pollen loads and progeny vigor in Cucurbita pepo: the next generation. Evolution, 44(5), 1358–1372.
pumpkin	80	Sasu_2009	567	cucurbita_spp_pepo	Texana	NA	wild	NA	NA	controlled	NA	NA	NA	NA	NA	NA	NA	105	total_number	NA	NA	16	total_number	Sasu, M. A., Ferrari, M. J., Du, D., Winsor, J. A., & Stephenson, A. G. (2009). Indirect costs of a nontarget pathogen mitigate the direct benefits of a virus-resistant transgene in wild Cucurbita. Pnas, 106(45), 19067–19071. http://doi.org/10.1073/pnas.0905106106
pumpkin	80	Sasu_2009	568	cucurbita_spp_pepo	Liberator_III	commercial_line	domNGE	NA	NA	controlled	NA	NA	NA	NA	NA	NA	NA	115	total_number	NA	NA	18	total_number	Sasu, M. A., Ferrari, M. J., Du, D., Winsor, J. A., & Stephenson, A. G. (2009). Indirect costs of a nontarget pathogen mitigate the direct benefits of a virus-resistant transgene in wild Cucurbita. Pnas, 106(45), 19067–19071. http://doi.org/10.1073/pnas.0905106106
pumpkin	80	Sasu_2009	569	cucurbita_spp_pepo	Liberator_III	commercial_line	domGE	CMV_ZYMV_WMV	3	controlled	NA	NA	NA	NA	NA	NA	NA	150	total_number	NA	NA	23	total_number	Sasu, M. A., Ferrari, M. J., Du, D., Winsor, J. A., & Stephenson, A. G. (2009). Indirect costs of a nontarget pathogen mitigate the direct benefits of a virus-resistant transgene in wild Cucurbita. Pnas, 106(45), 19067–19071. http://doi.org/10.1073/pnas.0905106106
pumpkin	81	Johansson_1998	570	cucurbita_spp_texana	NA	NA	wild	NA	NA	controlled	1368.2	total_number	NA	NA	NA	NA	NA	28.8	total_number	NA	NA	7.9	total_number	Johannsson, M. H., Gates, M. J., & Stephenson, A. G. (1998). Inbreeding depression affects pollen performance in Cucurbita texana. Journal of Evolutionary Biology, 11, 597–588.
pumpkin	81	Johansson_1998	571	cucurbita_spp_pepo	NA	commercial_line	domNGE	NA	NA	controlled	2770.5	total_number	NA	NA	NA	NA	NA	39.1	total_number	NA	NA	14.8	total_number	Johannsson, M. H., Gates, M. J., & Stephenson, A. G. (1998). Inbreeding depression affects pollen performance in Cucurbita texana. Journal of Evolutionary Biology, 11, 597–588.
pumpkin	82	Spencer_2001a	572	cucurbita_pepo	NA	NA	wild	NA	NA	controlled	NA	NA	NA	NA	NA	NA	NA	NA	NA	NA	NA	NA	NA	Spencer, L. J. (2001). Hybridization and introgression in Cucurbita pepo: an examination of the effects of transgenic virus resistance on wild-crop hybrids. The Ohio State University.
pumpkin	82	Spencer_2001a	573	cucurbita_pepo	Freedom_II	hybrid	domGE	ZYMV_WMV2	3	controlled	NA	NA	NA	NA	NA	NA	NA	NA	NA	NA	NA	NA	NA	Spencer, L. J. (2001). Hybridization and introgression in Cucurbita pepo: an examination of the effects of transgenic virus resistance on wild-crop hybrids. The Ohio State University.
pumpkin	82	Spencer_2001a	574	cucurbita_pepo	NA	NA	wild	NA	NA	controlled	NA	NA	NA	NA	NA	NA	NA	NA	NA	NA	NA	NA	NA	Spencer, L. J. (2001). Hybridization and introgression in Cucurbita pepo: an examination of the effects of transgenic virus resistance on wild-crop hybrids. The Ohio State University.
pumpkin	82	Spencer_2001a	575	cucurbita_pepo	Freedom_II	hybrid	domGE	ZYMV_WMV2	3	controlled	NA	NA	NA	NA	NA	NA	NA	NA	NA	NA	NA	NA	NA	Spencer, L. J. (2001). Hybridization and introgression in Cucurbita pepo: an examination of the effects of transgenic virus resistance on wild-crop hybrids. The Ohio State University.
pumpkin	82	Spencer_2001a	576	cucurbita_pepo	NA	NA	wild	NA	NA	controlled	3302	NA	NA	NA	NA	NA	NA	NA	NA	NA	NA	25.4	total_number	Spencer, L. J. (2001). Hybridization and introgression in Cucurbita pepo: an examination of the effects of transgenic virus resistance on wild-crop hybrids. The Ohio State University.
pumpkin	82	Spencer_2001a	577	cucurbita_pepo	Freedom_II	hybrid	domGE	ZYMV_WMV2	3	controlled	1413	NA	NA	NA	NA	NA	NA	NA	NA	NA	NA	9	total_number	Spencer, L. J. (2001). Hybridization and introgression in Cucurbita pepo: an examination of the effects of transgenic virus resistance on wild-crop hybrids. The Ohio State University.
pumpkin	82	Spencer_2001a	578	cucurbita_pepo	Freedom_II	hybrid	domGE	ZYMV_WMV2	3	controlled	551	NA	NA	NA	NA	NA	NA	NA	NA	NA	NA	2.9	total_number	Spencer, L. J. (2001). Hybridization and introgression in Cucurbita pepo: an examination of the effects of transgenic virus resistance on wild-crop hybrids. The Ohio State University.
pumpkin	82	Spencer_2001a	579	cucurbita_pepo	NA	NA	wild	NA	NA	controlled	17574	NA	NA	NA	NA	NA	NA	NA	NA	NA	NA	101	total_number	Spencer, L. J. (2001). Hybridization and introgression in Cucurbita pepo: an examination of the effects of transgenic virus resistance on wild-crop hybrids. The Ohio State University.
pumpkin	82	Spencer_2001a	580	cucurbita_pepo	Freedom_II	hybrid	domGE	ZYMV_WMV2	3	controlled	8816	NA	NA	NA	NA	NA	NA	NA	NA	NA	NA	38	total_number	Spencer, L. J. (2001). Hybridization and introgression in Cucurbita pepo: an examination of the effects of transgenic virus resistance on wild-crop hybrids. The Ohio State University.
pumpkin	82	Spencer_2001a	581	cucurbita_pepo	Freedom_II	hybrid	domGE	ZYMV_WMV3	3	controlled	2690	NA	NA	NA	NA	NA	NA	NA	NA	NA	NA	10	total_number	Spencer, L. J. (2001). Hybridization and introgression in Cucurbita pepo: an examination of the effects of transgenic virus resistance on wild-crop hybrids. The Ohio State University.
pumpkin	82	Spencer_2001a	582	cucurbita_pepo	NA	NA	wild	NA	NA	controlled	1164.8	NA	NA	NA	NA	NA	NA	NA	NA	NA	NA	10.4	total_number	Spencer, L. J. (2001). Hybridization and introgression in Cucurbita pepo: an examination of the effects of transgenic virus resistance on wild-crop hybrids. The Ohio State University.
pumpkin	82	Spencer_2001a	583	cucurbita_pepo	Freedom_II	hybrid	domGE	ZYMV_WMV2	3	controlled	1062.5	NA	NA	NA	NA	NA	NA	NA	NA	NA	NA	8.5	total_number	Spencer, L. J. (2001). Hybridization and introgression in Cucurbita pepo: an examination of the effects of transgenic virus resistance on wild-crop hybrids. The Ohio State University.
pumpkin	82	Spencer_2001a	584	cucurbita_pepo	Freedom_II	hybrid	domGE	ZYMV_WMV3	3	controlled	1050.8	NA	NA	NA	NA	NA	NA	NA	NA	NA	NA	7.4	total_number	Spencer, L. J. (2001). Hybridization and introgression in Cucurbita pepo: an examination of the effects of transgenic virus resistance on wild-crop hybrids. The Ohio State University.
pumpkin	82	Spencer_2001a	585	cucurbita_pepo	Freedom_II	hybrid	domGE	ZYMV_WMV4	3	controlled	436.8	NA	NA	NA	NA	NA	NA	NA	NA	NA	NA	2.8	total_number	Spencer, L. J. (2001). Hybridization and introgression in Cucurbita pepo: an examination of the effects of transgenic virus resistance on wild-crop hybrids. The Ohio State University.
pumpkin	82	Spencer_2001a	586	cucurbita_pepo	NA	NA	wild	NA	NA	controlled	2562	NA	NA	NA	NA	NA	NA	NA	NA	NA	NA	21	total_number	Spencer, L. J. (2001). Hybridization and introgression in Cucurbita pepo: an examination of the effects of transgenic virus resistance on wild-crop hybrids. The Ohio State University.
pumpkin	82	Spencer_2001a	587	cucurbita_pepo	Freedom_II	hybrid	domGE	ZYMV_WMV2	3	controlled	2223	NA	NA	NA	NA	NA	NA	NA	NA	NA	NA	17.1	total_number	Spencer, L. J. (2001). Hybridization and introgression in Cucurbita pepo: an examination of the effects of transgenic virus resistance on wild-crop hybrids. The Ohio State University.
pumpkin	82	Spencer_2001a	588	cucurbita_pepo	Freedom_II	hybrid	domGE	ZYMV_WMV3	3	controlled	2085	NA	NA	NA	NA	NA	NA	NA	NA	NA	NA	15.8	total_number	Spencer, L. J. (2001). Hybridization and introgression in Cucurbita pepo: an examination of the effects of transgenic virus resistance on wild-crop hybrids. The Ohio State University.
pumpkin	82	Spencer_2001a	589	cucurbita_pepo	Freedom_II	hybrid	domGE	ZYMV_WMV4	3	controlled	1145	NA	NA	NA	NA	NA	NA	NA	NA	NA	NA	7.9	total_number	Spencer, L. J. (2001). Hybridization and introgression in Cucurbita pepo: an examination of the effects of transgenic virus resistance on wild-crop hybrids. The Ohio State University.
pumpkin	83	Zhang_2012	590	cucurbita_spp	S179xNK	hybrid	domNGE	NA	NA	controlled	2997	NA	NA	NA	NA	NA	NA	NA	NA	NA	NA	15	total_number	Zhang, Q., Yu, E., & Medina, A. (2012). Development of advanced interspecific-bridge lines among cucurbita pepo, C. maxima, and C. moschata. HortScience, 47(4), 452–458.
pumpkin	83	Zhang_2012	591	cucurbita_spp	SglfxArg	hybrid	domNGE	NA	NA	controlled	1445	NA	NA	NA	NA	NA	NA	NA	NA	NA	NA	8	total_number	Zhang, Q., Yu, E., & Medina, A. (2012). Development of advanced interspecific-bridge lines among cucurbita pepo, C. maxima, and C. moschata. HortScience, 47(4), 452–458.
pumpkin	83	Zhang_2012	592	cucurbita_spp	ArgxRvif	hybrid	domNGE	NA	NA	controlled	962	NA	NA	NA	NA	NA	NA	NA	NA	NA	NA	6	total_number	Zhang, Q., Yu, E., & Medina, A. (2012). Development of advanced interspecific-bridge lines among cucurbita pepo, C. maxima, and C. moschata. HortScience, 47(4), 452–458.
pumpkin	83	Zhang_2012	593	cucurbita_spp	S179xRvif	hybrid	domNGE	NA	NA	controlled	1394	NA	NA	NA	NA	NA	NA	NA	NA	NA	NA	7	total_number	Zhang, Q., Yu, E., & Medina, A. (2012). Development of advanced interspecific-bridge lines among cucurbita pepo, C. maxima, and C. moschata. HortScience, 47(4), 452–458.
pumpkin	83	Zhang_2012	594	cucurbita_spp	ArgxBcup	hybrid	domNGE	NA	NA	controlled	429	NA	NA	NA	NA	NA	NA	NA	NA	NA	NA	4	total_number	Zhang, Q., Yu, E., & Medina, A. (2012). Development of advanced interspecific-bridge lines among cucurbita pepo, C. maxima, and C. moschata. HortScience, 47(4), 452–458.
pumpkin	83	Zhang_2012	595	cucurbita_spp	S179xNKxArg	hybrid	domNGE	NA	NA	controlled	1671	NA	NA	NA	NA	NA	NA	NA	NA	NA	NA	9	total_number	Zhang, Q., Yu, E., & Medina, A. (2012). Development of advanced interspecific-bridge lines among cucurbita pepo, C. maxima, and C. moschata. HortScience, 47(4), 452–458.
pumpkin	83	Zhang_2012	596	cucurbita_spp	SgLfArgxNK	hybrid	domNGE	NA	NA	controlled	1603	NA	NA	NA	NA	NA	NA	NA	NA	NA	NA	13	total_number	Zhang, Q., Yu, E., & Medina, A. (2012). Development of advanced interspecific-bridge lines among cucurbita pepo, C. maxima, and C. moschata. HortScience, 47(4), 452–458.
pumpkin	83	Zhang_2012	597	cucurbita_spp	S179xNKxBcup	hybrid	domNGE	NA	NA	controlled	1522	NA	NA	NA	NA	NA	NA	NA	NA	NA	NA	12	total_number	Zhang, Q., Yu, E., & Medina, A. (2012). Development of advanced interspecific-bridge lines among cucurbita pepo, C. maxima, and C. moschata. HortScience, 47(4), 452–458.
pumpkin	83	Zhang_2012	598	cucurbita_spp	ArgxBcupxRvif	hybrid	domNGE	NA	NA	controlled	1322	NA	NA	NA	NA	NA	NA	NA	NA	NA	NA	11	total_number	Zhang, Q., Yu, E., & Medina, A. (2012). Development of advanced interspecific-bridge lines among cucurbita pepo, C. maxima, and C. moschata. HortScience, 47(4), 452–458.
pumpkin	83	Zhang_2012	599	cucurbita_spp	SgLfxArgxBcup	hybrid	domNGE	NA	NA	controlled	992	NA	NA	NA	NA	NA	NA	NA	NA	NA	NA	5	total_number	Zhang, Q., Yu, E., & Medina, A. (2012). Development of advanced interspecific-bridge lines among cucurbita pepo, C. maxima, and C. moschata. HortScience, 47(4), 452–458.
pumpkin	83	Zhang_2012	600	cucurbita_spp	S179xBcupxRvif	hybrid	domNGE	NA	NA	controlled	567	NA	NA	NA	NA	NA	NA	NA	NA	NA	NA	3	total_number	Zhang, Q., Yu, E., & Medina, A. (2012). Development of advanced interspecific-bridge lines among cucurbita pepo, C. maxima, and C. moschata. HortScience, 47(4), 452–458.
pumpkin	83	Zhang_2012	601	cucurbita_spp	H7bxS179xNKxArg	hybrid	domGE	ZYMV	3	controlled	1233	NA	NA	NA	NA	NA	NA	NA	NA	NA	NA	6	total_number	Zhang, Q., Yu, E., & Medina, A. (2012). Development of advanced interspecific-bridge lines among cucurbita pepo, C. maxima, and C. moschata. HortScience, 47(4), 452–458.
pumpkin	83	Zhang_2012	602	cucurbita_spp	H7bxS179xNKxBcup	hybrid	domGE	ZYMV	3	controlled	1504	NA	NA	NA	NA	NA	NA	NA	NA	NA	NA	7	total_number	Zhang, Q., Yu, E., & Medina, A. (2012). Development of advanced interspecific-bridge lines among cucurbita pepo, C. maxima, and C. moschata. HortScience, 47(4), 452–458.
pumpkin	83	Zhang_2012	603	cucurbita_spp	3112MPxArgxBcupxRvif	hybrid	domGE	ZYMV	3	controlled	868	NA	NA	NA	NA	NA	NA	NA	NA	NA	NA	5	total_number	Zhang, Q., Yu, E., & Medina, A. (2012). Development of advanced interspecific-bridge lines among cucurbita pepo, C. maxima, and C. moschata. HortScience, 47(4), 452–458.
pumpkin	84	Resende_2013	604	cucurbita_pepo	A612	commercial_line	domNGE	NA	NA	controlled	NA	NA	NA	NA	NA	NA	NA	NA	NA	NA	NA	3.6	total_number	Resende, G. M. De, & Costa, N. D. (2013). Produtividade da cultura da abobora em diferentes densidades de plantio no Vale do Sao Francisco. Horticultura Brasileira, 24(2), 228–232. http://doi.org/10.1590/S0102-05362006000200022
pumpkin	84	Resende_2013	605	cucurbita_pepo	A620	commercial_line	domNGE	NA	NA	controlled	NA	NA	NA	NA	NA	NA	NA	NA	NA	NA	NA	4.6	total_number	Resende, G. M. De, & Costa, N. D. (2013). Produtividade da cultura da abobora em diferentes densidades de plantio no Vale do Sao Francisco. Horticultura Brasileira, 24(2), 228–232. http://doi.org/10.1590/S0102-05362006000200022
pumpkin	84	Resende_2013	606	cucurbita_pepo	A422	commercial_line	domNGE	NA	NA	controlled	NA	NA	NA	NA	NA	NA	NA	NA	NA	NA	NA	3.5	total_number	Resende, G. M. De, & Costa, N. D. (2013). Produtividade da cultura da abobora em diferentes densidades de plantio no Vale do Sao Francisco. Horticultura Brasileira, 24(2), 228–232. http://doi.org/10.1590/S0102-05362006000200022
pumpkin	84	Resende_2013	607	cucurbita_pepo	A627	commercial_line	domNGE	NA	NA	controlled	NA	NA	NA	NA	NA	NA	NA	NA	NA	NA	NA	3.8	total_number	Resende, G. M. De, & Costa, N. D. (2013). Produtividade da cultura da abobora em diferentes densidades de plantio no Vale do Sao Francisco. Horticultura Brasileira, 24(2), 228–232. http://doi.org/10.1590/S0102-05362006000200022
pumpkin	84	Resende_2013	608	cucurbita_pepo	Jacarezinho	commercial_line	domNGE	NA	NA	controlled	NA	NA	NA	NA	NA	NA	NA	NA	NA	NA	NA	4.7	total_number	Resende, G. M. De, & Costa, N. D. (2013). Produtividade da cultura da abobora em diferentes densidades de plantio no Vale do Sao Francisco. Horticultura Brasileira, 24(2), 228–232. http://doi.org/10.1590/S0102-05362006000200022
pumpkin	85	Latifi_2012	609	cucurbita_pepo	NA	NA	domNGE	NA	NA	controlled	1066	NA	NA	NA	NA	NA	NA	8.86	total_number	NA	NA	2.51	total_number	Latifi, M., Barimavandl, A., Sedaghathoor, S., & Lipayi, S. R. (2012). Sowing date and plant population effects on seed yield of Cucurbita Pepo. International Journal of Agriculture and Biology, 14(4).
pumpkin	85	Latifi_2012	610	cucurbita_pepo	NA	NA	domNGE	NA	NA	controlled	890	NA	NA	NA	NA	NA	NA	7.17	total_number	NA	NA	2.19	total_number	Latifi, M., Barimavandl, A., Sedaghathoor, S., & Lipayi, S. R. (2012). Sowing date and plant population effects on seed yield of Cucurbita Pepo. International Journal of Agriculture and Biology, 14(4).
pumpkin	85	Latifi_2012	611	cucurbita_pepo	NA	NA	domNGE	NA	NA	controlled	671.8	NA	NA	NA	NA	NA	NA	5.76	total_number	NA	NA	2.02	total_number	Latifi, M., Barimavandl, A., Sedaghathoor, S., & Lipayi, S. R. (2012). Sowing date and plant population effects on seed yield of Cucurbita Pepo. International Journal of Agriculture and Biology, 14(4).
pumpkin	85	Latifi_2012	612	cucurbita_pepo	NA	NA	domNGE	NA	NA	controlled	951.7	NA	NA	NA	NA	NA	NA	8.22	total_number	NA	NA	2.48	total_number	Latifi, M., Barimavandl, A., Sedaghathoor, S., & Lipayi, S. R. (2012). Sowing date and plant population effects on seed yield of Cucurbita Pepo. International Journal of Agriculture and Biology, 14(4).
pumpkin	85	Latifi_2012	613	cucurbita_pepo	NA	NA	domNGE	NA	NA	controlled	731.5	NA	NA	NA	NA	NA	NA	6.05	total_number	NA	NA	2.12	total_number	Latifi, M., Barimavandl, A., Sedaghathoor, S., & Lipayi, S. R. (2012). Sowing date and plant population effects on seed yield of Cucurbita Pepo. International Journal of Agriculture and Biology, 14(4).
pumpkin	85	Latifi_2012	614	cucurbita_pepo	NA	NA	domNGE	NA	NA	controlled	575.9	NA	NA	NA	NA	NA	NA	5.15	total_number	NA	NA	1.91	total_number	Latifi, M., Barimavandl, A., Sedaghathoor, S., & Lipayi, S. R. (2012). Sowing date and plant population effects on seed yield of Cucurbita Pepo. International Journal of Agriculture and Biology, 14(4).
pumpkin	85	Latifi_2012	615	cucurbita_pepo	NA	NA	domNGE	NA	NA	controlled	830	NA	NA	NA	NA	NA	NA	5.86	total_number	NA	NA	2.27	total_number	Latifi, M., Barimavandl, A., Sedaghathoor, S., & Lipayi, S. R. (2012). Sowing date and plant population effects on seed yield of Cucurbita Pepo. International Journal of Agriculture and Biology, 14(4).
pumpkin	85	Latifi_2012	616	cucurbita_pepo	NA	NA	domNGE	NA	NA	controlled	563.8	NA	NA	NA	NA	NA	NA	4.84	total_number	NA	NA	1.65	total_number	Latifi, M., Barimavandl, A., Sedaghathoor, S., & Lipayi, S. R. (2012). Sowing date and plant population effects on seed yield of Cucurbita Pepo. International Journal of Agriculture and Biology, 14(4).
pumpkin	85	Latifi_2012	617	cucurbita_pepo	NA	NA	domNGE	NA	NA	controlled	448.4	NA	NA	NA	NA	NA	NA	3.94	total_number	NA	NA	1.44	total_number	Latifi, M., Barimavandl, A., Sedaghathoor, S., & Lipayi, S. R. (2012). Sowing date and plant population effects on seed yield of Cucurbita Pepo. International Journal of Agriculture and Biology, 14(4).
maize	86	Guadagnolo_2006	618	zea_mays	NA	hybrid	domGE	cp4epsps	1	controlled	150	total_number	NA	NA	NA	NA	64	NA	NA	97	cm	NA	NA	Guadagnuolo, R., & J. Clegg and N. C. Ellstrand. (2007). Relative fitness of transgenic vs non-transgenic maize x teosinte hybrids: A field evaluation. Ecological Applications, 16(5), 1967–1974.
maize	86	Guadagnolo_2006	619	teocinte	NA	NA	wild	NA	NA	controlled	380	total_number	NA	NA	NA	NA	61	NA	NA	140	cm	NA	NA	Guadagnuolo, R., & J. Clegg and N. C. Ellstrand. (2007). Relative fitness of transgenic vs non-transgenic maize x teosinte hybrids: A field evaluation. Ecological Applications, 16(5), 1967–1974.
maize	86	Guadagnolo_2006	620	zea_mays	NA	NA	domGE	cp4epsps	1	controlled	430	total_number	NA	NA	NA	NA	60	NA	NA	162	cm	NA	NA	Guadagnuolo, R., & J. Clegg and N. C. Ellstrand. (2007). Relative fitness of transgenic vs non-transgenic maize x teosinte hybrids: A field evaluation. Ecological Applications, 16(5), 1967–1974.
maize	86	Guadagnolo_2006	621	zea_mays	NA	NA	domGE	cp4epsps	1	controlled	500	total_number	NA	NA	NA	NA	58	NA	NA	182	cm	NA	NA	Guadagnuolo, R., & J. Clegg and N. C. Ellstrand. (2007). Relative fitness of transgenic vs non-transgenic maize x teosinte hybrids: A field evaluation. Ecological Applications, 16(5), 1967–1974.
maize	87	Flint-Garcia_2009	622	teocinte	NA	NA	wild	NA	NA	controlled	NA	NA	NA	NA	NA	NA	NA	NA	NA	NA	NA	NA	NA	Flint-Garcia, S. A., Bodnar, A. L., & Scott, M. P. (2009). Wide variability in kernel composition, seed characteristics, and zein profiles among diverse maize inbreds, landraces, and teosinte. Theor Appl Genetics, 119, 1129–1142. http://doi.org/10.1007/s00122-009-1115-1
maize	87	Flint-Garcia_2009	623	zea_mays	NA	NA	wild	NA	NA	controlled	NA	NA	NA	NA	NA	NA	NA	NA	NA	NA	NA	NA	NA	Flint-Garcia, S. A., Bodnar, A. L., & Scott, M. P. (2009). Wide variability in kernel composition, seed characteristics, and zein profiles among diverse maize inbreds, landraces, and teosinte. Theor Appl Genetics, 119, 1129–1142. http://doi.org/10.1007/s00122-009-1115-1
maize	87	Flint-Garcia_2009	624	zea_mays	NA	NA	domNGE	NA	NA	controlled	NA	NA	NA	NA	NA	NA	NA	NA	NA	NA	NA	NA	NA	Flint-Garcia, S. A., Bodnar, A. L., & Scott, M. P. (2009). Wide variability in kernel composition, seed characteristics, and zein profiles among diverse maize inbreds, landraces, and teosinte. Theor Appl Genetics, 119, 1129–1142. http://doi.org/10.1007/s00122-009-1115-1
maize	88	Sanchez_2011	625	zea_spp	NA	landrace	domNGE	NA	NA	controlled	NA	NA	NA	NA	NA	NA	92	NA	NA	285	cm	NA	NA	Sánchez, G. J. J. (2011). Diversidad del Maíz y el Teocintle. Informe preparado para el proyecto: “Recopilación, generación, actualización y análisis de información acerca de la diversidad genética de maíces y sus parientes silvestres.” Ciudad de México.
maize	88	Sanchez_2011	626	zea_perenis	NA	landrace	domNGE	NA	NA	controlled	NA	NA	NA	NA	NA	NA	110	NA	NA	170	cm	NA	NA	Sánchez, G. J. J. (2011). Diversidad del Maíz y el Teocintle. Informe preparado para el proyecto: “Recopilación, generación, actualización y análisis de información acerca de la diversidad genética de maíces y sus parientes silvestres.” Ciudad de México.
maize	88	Sanchez_2011	627	zea_mexicazea_mays	NA	teocintle	wild	NA	NA	controlled	NA	NA	NA	NA	NA	NA	60	NA	NA	150	cm	NA	NA	Sánchez, G. J. J. (2011). Diversidad del Maíz y el Teocintle. Informe preparado para el proyecto: “Recopilación, generación, actualización y análisis de información acerca de la diversidad genética de maíces y sus parientes silvestres.” Ciudad de México.
maize	88	Sanchez_2011	628	zea_mexicazea_mays	NA	teocintle	wild	NA	NA	controlled	NA	NA	NA	NA	NA	NA	75	NA	NA	199	cm	NA	NA	Sánchez, G. J. J. (2011). Diversidad del Maíz y el Teocintle. Informe preparado para el proyecto: “Recopilación, generación, actualización y análisis de información acerca de la diversidad genética de maíces y sus parientes silvestres.” Ciudad de México.
maize	88	Sanchez_2011	629	zea_mexicazea_mays	NA	teocintle	wild	NA	NA	controlled	NA	NA	NA	NA	NA	NA	72	NA	NA	180	cm	NA	NA	Sánchez, G. J. J. (2011). Diversidad del Maíz y el Teocintle. Informe preparado para el proyecto: “Recopilación, generación, actualización y análisis de información acerca de la diversidad genética de maíces y sus parientes silvestres.” Ciudad de México.
maize	88	Sanchez_2011	630	zea_mays_sub_parviglumis	NA	teocintle	wild	NA	NA	controlled	NA	NA	NA	NA	NA	NA	100	NA	NA	NA	NA	NA	NA	Sánchez, G. J. J. (2011). Diversidad del Maíz y el Teocintle. Informe preparado para el proyecto: “Recopilación, generación, actualización y análisis de información acerca de la diversidad genética de maíces y sus parientes silvestres.” Ciudad de México.
maize	88	Sanchez_2011	631	zea_mays_sub_parviglumis	NA	teocintle	wild	NA	NA	controlled	NA	NA	NA	NA	NA	NA	95	NA	NA	NA	NA	NA	NA	Sánchez, G. J. J. (2011). Diversidad del Maíz y el Teocintle. Informe preparado para el proyecto: “Recopilación, generación, actualización y análisis de información acerca de la diversidad genética de maíces y sus parientes silvestres.” Ciudad de México.
maize	88	Sanchez_2011	632	zea_mays_sub_parviglumis	NA	teocintle	wild	NA	NA	controlled	NA	NA	NA	NA	NA	NA	85	NA	NA	NA	NA	NA	NA	Sánchez, G. J. J. (2011). Diversidad del Maíz y el Teocintle. Informe preparado para el proyecto: “Recopilación, generación, actualización y análisis de información acerca de la diversidad genética de maíces y sus parientes silvestres.” Ciudad de México.
maize	89	wellhausen_1951	633	zea_mays	NA	landrace	domNGE	NA	NA	controlled	NA	NA	NA	NA	NA	NA	NA	NA	NA	170	cm	NA	NA	Wellhausen, E., Roberts, L., Hernández Xolocotzi, E., & Mangelsdorf, P. (1951). Razas de Maíz en México, su origen, características y distribución. Folleto Técnico, (5), 237.
maize	89	wellhausen_1951	634	zea_mays	NA	landrace	domNGE	NA	NA	controlled	NA	NA	NA	NA	NA	NA	NA	NA	NA	160	cm	NA	NA	Wellhausen, E., Roberts, L., Hernández Xolocotzi, E., & Mangelsdorf, P. (1951). Razas de Maíz en México, su origen, características y distribución. Folleto Técnico, (5), 237.
maize	89	wellhausen_1951	635	zea_mays	NA	landrace	domNGE	NA	NA	controlled	NA	NA	NA	NA	NA	NA	105	NA	NA	175	cm	NA	NA	Wellhausen, E., Roberts, L., Hernández Xolocotzi, E., & Mangelsdorf, P. (1951). Razas de Maíz en México, su origen, características y distribución. Folleto Técnico, (5), 237.
maize	89	wellhausen_1951	636	zea_mays	NA	landrace	domNGE	NA	NA	controlled	NA	NA	NA	NA	NA	NA	NA	NA	NA	200	cm	NA	NA	Wellhausen, E., Roberts, L., Hernández Xolocotzi, E., & Mangelsdorf, P. (1951). Razas de Maíz en México, su origen, características y distribución. Folleto Técnico, (5), 237.
maize	89	wellhausen_1951	637	zea_mays	NA	landrace	domNGE	NA	NA	controlled	NA	NA	NA	NA	NA	NA	108	NA	NA	275	cm	NA	NA	Wellhausen, E., Roberts, L., Hernández Xolocotzi, E., & Mangelsdorf, P. (1951). Razas de Maíz en México, su origen, características y distribución. Folleto Técnico, (5), 237.
maize	89	wellhausen_1951	638	zea_spp	NA	hybrid	domNGE	NA	NA	controlled	NA	NA	NA	NA	NA	NA	NA	NA	NA	200	cm	NA	NA	Wellhausen, E., Roberts, L., Hernández Xolocotzi, E., & Mangelsdorf, P. (1951). Razas de Maíz en México, su origen, características y distribución. Folleto Técnico, (5), 237.
maize	89	wellhausen_1951	639	zea_mays	NA	landrace	domNGE	NA	NA	controlled	NA	NA	NA	NA	NA	NA	106	NA	NA	150	cm	NA	NA	Wellhausen, E., Roberts, L., Hernández Xolocotzi, E., & Mangelsdorf, P. (1951). Razas de Maíz en México, su origen, características y distribución. Folleto Técnico, (5), 237.
maize	89	wellhausen_1951	640	zea_mays	NA	landrace	domNGE	NA	NA	controlled	NA	NA	NA	NA	NA	NA	107	NA	NA	240	cm	NA	NA	Wellhausen, E., Roberts, L., Hernández Xolocotzi, E., & Mangelsdorf, P. (1951). Razas de Maíz en México, su origen, características y distribución. Folleto Técnico, (5), 237.
maize	89	wellhausen_1951	641	zea_mays	NA	landrace	domNGE	NA	NA	controlled	NA	NA	NA	NA	NA	NA	169	NA	NA	330	cm	NA	NA	Wellhausen, E., Roberts, L., Hernández Xolocotzi, E., & Mangelsdorf, P. (1951). Razas de Maíz en México, su origen, características y distribución. Folleto Técnico, (5), 237.
maize	89	wellhausen_1951	642	zea_mays	NA	landrace	domNGE	NA	NA	controlled	NA	NA	NA	NA	NA	NA	137	NA	NA	450	cm	NA	NA	Wellhausen, E., Roberts, L., Hernández Xolocotzi, E., & Mangelsdorf, P. (1951). Razas de Maíz en México, su origen, características y distribución. Folleto Técnico, (5), 237.
maize	89	wellhausen_1951	643	zea_mays	NA	landrace	domNGE	NA	NA	controlled	NA	NA	NA	NA	NA	NA	134	NA	NA	450	cm	NA	NA	Wellhausen, E., Roberts, L., Hernández Xolocotzi, E., & Mangelsdorf, P. (1951). Razas de Maíz en México, su origen, características y distribución. Folleto Técnico, (5), 237.
maize	89	wellhausen_1951	644	zea_mays	NA	landrace	domNGE	NA	NA	controlled	NA	NA	NA	NA	NA	NA	96	NA	NA	150	cm	NA	NA	Wellhausen, E., Roberts, L., Hernández Xolocotzi, E., & Mangelsdorf, P. (1951). Razas de Maíz en México, su origen, características y distribución. Folleto Técnico, (5), 237.
maize	89	wellhausen_1951	645	zea_mays	NA	landrace	domNGE	NA	NA	controlled	NA	NA	NA	NA	NA	NA	118	NA	NA	200	cm	NA	NA	Wellhausen, E., Roberts, L., Hernández Xolocotzi, E., & Mangelsdorf, P. (1951). Razas de Maíz en México, su origen, características y distribución. Folleto Técnico, (5), 237.
maize	89	wellhausen_1951	646	zea_mays	NA	landrace	domNGE	NA	NA	controlled	NA	NA	NA	NA	NA	NA	NA	NA	NA	NA	NA	NA	NA	Wellhausen, E., Roberts, L., Hernández Xolocotzi, E., & Mangelsdorf, P. (1951). Razas de Maíz en México, su origen, características y distribución. Folleto Técnico, (5), 237.
maize	89	wellhausen_1951	647	zea_mays	NA	landrace	domNGE	NA	NA	controlled	NA	NA	NA	NA	NA	NA	135	NA	NA	300	cm	NA	NA	Wellhausen, E., Roberts, L., Hernández Xolocotzi, E., & Mangelsdorf, P. (1951). Razas de Maíz en México, su origen, características y distribución. Folleto Técnico, (5), 237.
maize	89	wellhausen_1951	648	zea_mays	NA	landrace	domNGE	NA	NA	controlled	NA	NA	NA	NA	NA	NA	148	NA	NA	350	cm	NA	NA	Wellhausen, E., Roberts, L., Hernández Xolocotzi, E., & Mangelsdorf, P. (1951). Razas de Maíz en México, su origen, características y distribución. Folleto Técnico, (5), 237.
maize	89	wellhausen_1951	649	zea_mays	NA	landrace	domNGE	NA	NA	controlled	NA	NA	NA	NA	NA	NA	125	NA	NA	275	cm	NA	NA	Wellhausen, E., Roberts, L., Hernández Xolocotzi, E., & Mangelsdorf, P. (1951). Razas de Maíz en México, su origen, características y distribución. Folleto Técnico, (5), 237.
maize	89	wellhausen_1951	650	zea_mays	NA	landrace	domNGE	NA	NA	controlled	NA	NA	NA	NA	NA	NA	107	NA	NA	350	cm	NA	NA	Wellhausen, E., Roberts, L., Hernández Xolocotzi, E., & Mangelsdorf, P. (1951). Razas de Maíz en México, su origen, características y distribución. Folleto Técnico, (5), 237.
maize	89	wellhausen_1951	651	zea_mays	NA	landrace	domNGE	NA	NA	controlled	NA	NA	NA	NA	NA	NA	116	NA	NA	250	cm	NA	NA	Wellhausen, E., Roberts, L., Hernández Xolocotzi, E., & Mangelsdorf, P. (1951). Razas de Maíz en México, su origen, características y distribución. Folleto Técnico, (5), 237.
maize	89	wellhausen_1951	652	zea_mays	NA	landrace	domNGE	NA	NA	controlled	NA	NA	NA	NA	NA	NA	98	NA	NA	200	cm	NA	NA	Wellhausen, E., Roberts, L., Hernández Xolocotzi, E., & Mangelsdorf, P. (1951). Razas de Maíz en México, su origen, características y distribución. Folleto Técnico, (5), 237.
maize	89	wellhausen_1951	653	zea_mays	NA	landrace	domNGE	NA	NA	controlled	NA	NA	NA	NA	NA	NA	98	NA	NA	200	cm	NA	NA	Wellhausen, E., Roberts, L., Hernández Xolocotzi, E., & Mangelsdorf, P. (1951). Razas de Maíz en México, su origen, características y distribución. Folleto Técnico, (5), 237.
maize	90	moradi_2012	654	zea_mays	KSC704	hybrid	domNGE	NA	NA	controlled	68	total_number	NA	NA	NA	NA	NA	NA	NA	398	cm	NA	NA	Moradi, H., Akbari, G. A., Khorasani, S. K., & Ramshini, H. A. (2012). Evaluation of drought tolerance in corn (Zea mays L.) new hybrids with using stress tolerance indices. European Journal of Sustainable Development, 1(3), 543–560.
maize	91	farnia_2015	655	zea_mays	AS31	hybrid	domNGE	NA	NA	controlled	NA	NA	NA	NA	NA	NA	NA	NA	NA	186	cm	NA	NA	Farnia Amin, M. M. (2015). Study on Morphological Characteristics of Maize ( Zea mays L .) Cultivars under Different Plant Densities. Indian Journal Of Natural Sciences, 5(30), 976–997.
maize	91	farnia_2015	656	zea_mays	AS54	hybrid	domNGE	NA	NA	controlled	NA	NA	NA	NA	NA	NA	NA	NA	NA	179	cm	NA	NA	Farnia Amin, M. M. (2015). Study on Morphological Characteristics of Maize ( Zea mays L .) Cultivars under Different Plant Densities. Indian Journal Of Natural Sciences, 5(30), 976–997.
maize	91	farnia_2015	657	zea_mays	BIARIS	hybrid	domNGE	NA	NA	controlled	NA	NA	NA	NA	NA	NA	NA	NA	NA	214	cm	NA	NA	Farnia Amin, M. M. (2015). Study on Morphological Characteristics of Maize ( Zea mays L .) Cultivars under Different Plant Densities. Indian Journal Of Natural Sciences, 5(30), 976–997.
maize	92	szulc_215	658	zea_mays	NA	hybrid	domNGE	NA	NA	controlled	NA	NA	NA	NA	NA	NA	NA	NA	NA	NA	NA	NA	NA	Szulc, P., Piechota, T., Jagła, M., & Kowalski, M. (2015). A comparative analysis of growth in maize ( Zea mays L .) hybrids of different genetic profiles depending on type of nitrogen fertilizer and magnesium dose. International Journal of the Faculty Agriculture and Biology, 10(2), 73–81.
maize	92	szulc_215	659	zea_mays	Es_Palazzo	hybrid	domNGE	NA	NA	controlled	NA	NA	NA	NA	NA	NA	NA	NA	NA	NA	NA	NA	NA	Szulc, P., Piechota, T., Jagła, M., & Kowalski, M. (2015). A comparative analysis of growth in maize ( Zea mays L .) hybrids of different genetic profiles depending on type of nitrogen fertilizer and magnesium dose. International Journal of the Faculty Agriculture and Biology, 10(2), 73–81.
maize	92	szulc_215	660	zea_mays	Es_Paroli	hybrid	domNGE	NA	NA	controlled	NA	NA	NA	NA	NA	NA	NA	NA	NA	NA	NA	NA	NA	Szulc, P., Piechota, T., Jagła, M., & Kowalski, M. (2015). A comparative analysis of growth in maize ( Zea mays L .) hybrids of different genetic profiles depending on type of nitrogen fertilizer and magnesium dose. International Journal of the Faculty Agriculture and Biology, 10(2), 73–81.
maize	93	shrestha_2013	661	zea_mays	PUTU-21	hybrid	domNGE	NA	NA	controlled	NA	NA	NA	NA	NA	NA	61.6	NA	NA	145.95	cm	NA	NA	Jiban Shrestha. (2013). Agro-morphological characterization of maize inbred lines. Wudpecker Journal of Agricultural Research, 2(7), 209–211. Retrieved from http://www.wudpeckerresearchjournals.org/WJAR/pdf/2013/July/Shrestha.pdf
maize	93	shrestha_2013	662	zea_mays	RL-180	hybrid	domNGE	NA	NA	controlled	NA	NA	NA	NA	NA	NA	65	NA	NA	202	cm	NA	NA	Jiban Shrestha. (2013). Agro-morphological characterization of maize inbred lines. Wudpecker Journal of Agricultural Research, 2(7), 209–211. Retrieved from http://www.wudpeckerresearchjournals.org/WJAR/pdf/2013/July/Shrestha.pdf
maize	93	shrestha_2013	663	zea_mays	RML-62	hybrid	domNGE	NA	NA	controlled	NA	NA	NA	NA	NA	NA	62	NA	NA	108.63	cm	NA	NA	Jiban Shrestha. (2013). Agro-morphological characterization of maize inbred lines. Wudpecker Journal of Agricultural Research, 2(7), 209–211. Retrieved from http://www.wudpeckerresearchjournals.org/WJAR/pdf/2013/July/Shrestha.pdf
maize	93	shrestha_2013	664	zea_mays	RL-84	hybrid	domNGE	NA	NA	controlled	NA	NA	NA	NA	NA	NA	56	NA	NA	183.6	cm	NA	NA	Jiban Shrestha. (2013). Agro-morphological characterization of maize inbred lines. Wudpecker Journal of Agricultural Research, 2(7), 209–211. Retrieved from http://www.wudpeckerresearchjournals.org/WJAR/pdf/2013/July/Shrestha.pdf
maize	93	shrestha_2013	665	zea_mays	RML-55	hybrid	domNGE	NA	NA	controlled	NA	NA	NA	NA	92	%	53	NA	NA	163.27	cm	NA	NA	Jiban Shrestha. (2013). Agro-morphological characterization of maize inbred lines. Wudpecker Journal of Agricultural Research, 2(7), 209–211. Retrieved from http://www.wudpeckerresearchjournals.org/WJAR/pdf/2013/July/Shrestha.pdf
maize	93	shrestha_2013	666	zea_mays	RML-19	hybrid	domNGE	NA	NA	controlled	NA	NA	NA	NA	NA	NA	72	NA	NA	150	cm	NA	NA	Jiban Shrestha. (2013). Agro-morphological characterization of maize inbred lines. Wudpecker Journal of Agricultural Research, 2(7), 209–211. Retrieved from http://www.wudpeckerresearchjournals.org/WJAR/pdf/2013/July/Shrestha.pdf
maize	94	aslam_2013	667	zea_mays	32-F-10	commercial_line	domGE	ZMVPP1	5	controlled	NA	NA	NA	NA	NA	NA	NA	NA	NA	51.4	cm	NA	NA	Aslam, M., Shahid, M., Zamir, I., Afzal, I., & Yaseen, M. (2013). Morphological and Physiological Response of Maize Hybrids To Potassium Application Under. Journal of Agricultural R., 51(4), 443–454.
maize	94	aslam_2013	668	zea_mays	YH-1898	hybrid	domNGE	NA	NA	controlled	NA	NA	NA	NA	NA	NA	NA	NA	NA	44.86	cm	NA	NA	Aslam, M., Shahid, M., Zamir, I., Afzal, I., & Yaseen, M. (2013). Morphological and Physiological Response of Maize Hybrids To Potassium Application Under. Journal of Agricultural R., 51(4), 443–454.
maize	95	wang_2016	669	zea_mays	Shen5003	commercial_line	domGE	ZMVPP1	5	controlled	NA	NA	NA	NA	NA	NA	NA	NA	NA	NA	NA	NA	NA	Wang, X., Wang, H., Liu, S., Ferjani, A., Li, J., Yan, J., … Qin, F. (2016). Genetic variation in ZmVPP1 contributes to drought tolerance in maize seedlings. Nature Genetics, (August), 1–12. http://doi.org/10.1038/ng.3636
maize	95	wang_2016	670	zea_mays	CIMBL70	commercial_line	domGE	ZMVPP1	5	controlled	NA	NA	NA	NA	NA	NA	NA	NA	NA	NA	NA	NA	NA	Wang, X., Wang, H., Liu, S., Ferjani, A., Li, J., Yan, J., … Qin, F. (2016). Genetic variation in ZmVPP1 contributes to drought tolerance in maize seedlings. Nature Genetics, (August), 1–12. http://doi.org/10.1038/ng.3636
maize	95	wang_2016	671	zea_mays	OE2	commercial_line	domGE	ZMVPP1	5	controlled	NA	NA	NA	NA	NA	NA	NA	NA	NA	NA	NA	NA	NA	Wang, X., Wang, H., Liu, S., Ferjani, A., Li, J., Yan, J., … Qin, F. (2016). Genetic variation in ZmVPP1 contributes to drought tolerance in maize seedlings. Nature Genetics, (August), 1–12. http://doi.org/10.1038/ng.3636
maize	95	wang_2016	672	zea_mays	OE3	commercial_line	domGE	ZMVPP1	5	controlled	NA	NA	NA	NA	NA	NA	NA	NA	NA	NA	NA	NA	NA	Wang, X., Wang, H., Liu, S., Ferjani, A., Li, J., Yan, J., … Qin, F. (2016). Genetic variation in ZmVPP1 contributes to drought tolerance in maize seedlings. Nature Genetics, (August), 1–12. http://doi.org/10.1038/ng.3636
maize	95	wang_2016	673	zea_mays	OE4	commercial_line	domGE	ZMVPP1	5	controlled	NA	NA	NA	NA	NA	NA	NA	NA	NA	NA	NA	NA	NA	Wang, X., Wang, H., Liu, S., Ferjani, A., Li, J., Yan, J., … Qin, F. (2016). Genetic variation in ZmVPP1 contributes to drought tolerance in maize seedlings. Nature Genetics, (August), 1–12. http://doi.org/10.1038/ng.3636
maize	96	laserna_2012	674	zea_mays	DK747	hybrid	domNGE	NA	NA	controlled	693.73	total_number	NA	NA	NA	NA	NA	NA	NA	NA	NA	NA	NA	Laserna, M. P., Maddonni, G. A., & López, C. G. (2012). Phenotypic variations between non-transgenic and transgenic maize hybrids. Field Crops Research, 134, 175–184. http://doi.org/10.1016/j.fcr.2012.06.005
maize	96	laserna_2012	675	zea_mays	DK747-MG	commercial_line	domGE	cry	2	controlled	653.73	total_number	NA	NA	NA	NA	NA	NA	NA	NA	NA	NA	NA	Laserna, M. P., Maddonni, G. A., & López, C. G. (2012). Phenotypic variations between non-transgenic and transgenic maize hybrids. Field Crops Research, 134, 175–184. http://doi.org/10.1016/j.fcr.2012.06.005
maize	96	laserna_2012	676	zea_mays	DK747-RR	commercial_line	domGE	cp4epsps	1	controlled	668.71	total_number	NA	NA	NA	NA	NA	NA	NA	NA	NA	NA	NA	Laserna, M. P., Maddonni, G. A., & López, C. G. (2012). Phenotypic variations between non-transgenic and transgenic maize hybrids. Field Crops Research, 134, 175–184. http://doi.org/10.1016/j.fcr.2012.06.005
maize	96	laserna_2012	677	zea_mays	DK747-MGRR	commercial_line	domGE	cry/cp4epsps	2_1	controlled	653.57	total_number	NA	NA	NA	NA	NA	NA	NA	NA	NA	NA	NA	Laserna, M. P., Maddonni, G. A., & López, C. G. (2012). Phenotypic variations between non-transgenic and transgenic maize hybrids. Field Crops Research, 134, 175–184. http://doi.org/10.1016/j.fcr.2012.06.005
maize	96	laserna_2012	678	zea_mays	DK190-MG	commercial_line	domGE	cry	2	controlled	760.1	total_number	NA	NA	NA	NA	NA	NA	NA	NA	NA	NA	NA	Laserna, M. P., Maddonni, G. A., & López, C. G. (2012). Phenotypic variations between non-transgenic and transgenic maize hybrids. Field Crops Research, 134, 175–184. http://doi.org/10.1016/j.fcr.2012.06.005
maize	96	laserna_2012	679	zea_mays	DK190-RR	commercial_line	domGE	cp4epsps	1	controlled	782.47	total_number	NA	NA	NA	NA	NA	NA	NA	NA	NA	NA	NA	Laserna, M. P., Maddonni, G. A., & López, C. G. (2012). Phenotypic variations between non-transgenic and transgenic maize hybrids. Field Crops Research, 134, 175–184. http://doi.org/10.1016/j.fcr.2012.06.005
maize	96	laserna_2012	680	zea_mays	DK190-MGRR	commercial_line	domGE	cry/cp4epsps	2_1	controlled	776.5	total_number	NA	NA	NA	NA	NA	NA	NA	NA	NA	NA	NA	Laserna, M. P., Maddonni, G. A., & López, C. G. (2012). Phenotypic variations between non-transgenic and transgenic maize hybrids. Field Crops Research, 134, 175–184. http://doi.org/10.1016/j.fcr.2012.06.005
maize	97	cardenas-marcelo_2014	681	zea_mays	H-51AE	hybrid	domNGE	NA	NA	field	NA	NA	NA	NA	NA	NA	79.6	NA	NA	250	cm	NA	NA	Cárdenas-Marcelo, A. (2014). Productividad de híbridos comerciales y experimentales de maíz en tres localidades del Estado de México. UNAM.
maize	97	cardenas-marcelo_2014	682	zea_mays	FAISAN_ASG	hybrid	domNGE	NA	NA	field	NA	NA	NA	NA	NA	NA	82.9	NA	NA	255	cm	NA	NA	Cárdenas-Marcelo, A. (2014). Productividad de híbridos comerciales y experimentales de maíz en tres localidades del Estado de México. UNAM.
maize	97	cardenas-marcelo_2014	683	zea_mays	PROSPEC_AE3	hybrid	domNGE	NA	NA	field	NA	NA	NA	NA	NA	NA	82.8	NA	NA	247	cm	NA	NA	Cárdenas-Marcelo, A. (2014). Productividad de híbridos comerciales y experimentales de maíz en tres localidades del Estado de México. UNAM.
maize	97	cardenas-marcelo_2014	684	zea_mays	H-47AER1	hybrid	domNGE	NA	NA	field	NA	NA	NA	NA	NA	NA	82.5	NA	NA	253	cm	NA	NA	Cárdenas-Marcelo, A. (2014). Productividad de híbridos comerciales y experimentales de maíz en tres localidades del Estado de México. UNAM.
maize	97	cardenas-marcelo_2014	685	zea_mays	H-48	hybrid	domNGE	NA	NA	field	NA	NA	NA	NA	NA	NA	82.1	NA	NA	253	cm	NA	NA	Cárdenas-Marcelo, A. (2014). Productividad de híbridos comerciales y experimentales de maíz en tres localidades del Estado de México. UNAM.
maize	97	cardenas-marcelo_2014	686	zea_mays	H-70	hybrid	domNGE	NA	NA	field	NA	NA	NA	NA	NA	NA	82.7	NA	NA	242	cm	NA	NA	Cárdenas-Marcelo, A. (2014). Productividad de híbridos comerciales y experimentales de maíz en tres localidades del Estado de México. UNAM.
maize	97	cardenas-marcelo_2014	687	zea_mays	H-54	hybrid	domNGE	NA	NA	field	NA	NA	NA	NA	NA	NA	82	NA	NA	241	cm	NA	NA	Cárdenas-Marcelo, A. (2014). Productividad de híbridos comerciales y experimentales de maíz en tres localidades del Estado de México. UNAM.
maize	97	cardenas-marcelo_2014	688	zea_mays	H-40	hybrid	domNGE	NA	NA	field	NA	NA	NA	NA	90	%	82.7	NA	NA	244	cm	NA	NA	Cárdenas-Marcelo, A. (2014). Productividad de híbridos comerciales y experimentales de maíz en tres localidades del Estado de México. UNAM.
maize	97	cardenas-marcelo_2014	689	zea_mays	PROSPEC_AE1	hybrid	domNGE	NA	NA	field	NA	NA	NA	NA	NA	NA	84.4	NA	NA	260	cm	NA	NA	Cárdenas-Marcelo, A. (2014). Productividad de híbridos comerciales y experimentales de maíz en tres localidades del Estado de México. UNAM.
maize	97	cardenas-marcelo_2014	690	zea_mays	MJ8092	hybrid	domNGE	NA	NA	field	NA	NA	NA	NA	NA	NA	82	NA	NA	250	cm	NA	NA	Cárdenas-Marcelo, A. (2014). Productividad de híbridos comerciales y experimentales de maíz en tres localidades del Estado de México. UNAM.
maize	97	cardenas-marcelo_2014	691	zea_mays	Z-60	hybrid	domNGE	NA	NA	field	NA	NA	NA	NA	NA	NA	82	NA	NA	235	cm	NA	NA	Cárdenas-Marcelo, A. (2014). Productividad de híbridos comerciales y experimentales de maíz en tres localidades del Estado de México. UNAM.
maize	97	cardenas-marcelo_2014	692	zea_mays	PROSPEC_AE2	hybrid	domNGE	NA	NA	field	NA	NA	NA	NA	NA	NA	81.5	NA	NA	237	cm	NA	NA	Cárdenas-Marcelo, A. (2014). Productividad de híbridos comerciales y experimentales de maíz en tres localidades del Estado de México. UNAM.
maize	97	cardenas-marcelo_2014	693	zea_mays	ASPROS_722	hybrid	domNGE	NA	NA	field	NA	NA	NA	NA	NA	NA	80.5	NA	NA	247	cm	NA	NA	Cárdenas-Marcelo, A. (2014). Productividad de híbridos comerciales y experimentales de maíz en tres localidades del Estado de México. UNAM.
maize	97	cardenas-marcelo_2014	694	zea_mays	H-66	hybrid	domNGE	NA	NA	field	NA	NA	NA	NA	NA	NA	80.5	NA	NA	234	cm	NA	NA	Cárdenas-Marcelo, A. (2014). Productividad de híbridos comerciales y experimentales de maíz en tres localidades del Estado de México. UNAM.
maize	97	cardenas-marcelo_2014	695	zea_mays	SYN1806	hybrid	domNGE	NA	NA	field	NA	NA	NA	NA	NA	NA	80.6	NA	NA	227	cm	NA	NA	Cárdenas-Marcelo, A. (2014). Productividad de híbridos comerciales y experimentales de maíz en tres localidades del Estado de México. UNAM.
maize	97	cardenas-marcelo_2014	696	zea_mays	PUMA_1167	hybrid	domNGE	NA	NA	field	NA	NA	NA	NA	NA	NA	84.3	NA	NA	248	cm	NA	NA	Cárdenas-Marcelo, A. (2014). Productividad de híbridos comerciales y experimentales de maíz en tres localidades del Estado de México. UNAM.
maize	97	cardenas-marcelo_2014	697	zea_mays	P1684	hybrid	domNGE	NA	NA	field	NA	NA	NA	NA	NA	NA	79.7	NA	NA	230	cm	NA	NA	Cárdenas-Marcelo, A. (2014). Productividad de híbridos comerciales y experimentales de maíz en tres localidades del Estado de México. UNAM.
maize	97	cardenas-marcelo_2014	698	zea_mays	H-18	hybrid	domNGE	NA	NA	field	NA	NA	NA	NA	NA	NA	83.2	NA	NA	251	cm	NA	NA	Cárdenas-Marcelo, A. (2014). Productividad de híbridos comerciales y experimentales de maíz en tres localidades del Estado de México. UNAM.
maize	97	cardenas-marcelo_2014	699	zea_mays	H-50	hybrid	domNGE	NA	NA	field	NA	NA	NA	NA	NA	NA	81.1	NA	NA	275	cm	NA	NA	Cárdenas-Marcelo, A. (2014). Productividad de híbridos comerciales y experimentales de maíz en tres localidades del Estado de México. UNAM.
maize	97	cardenas-marcelo_2014	700	zea_mays	HID-17	hybrid	domNGE	NA	NA	field	NA	NA	NA	NA	NA	NA	83.2	NA	NA	225	cm	NA	NA	Cárdenas-Marcelo, A. (2014). Productividad de híbridos comerciales y experimentales de maíz en tres localidades del Estado de México. UNAM.
maize	97	cardenas-marcelo_2014	701	zea_mays	PUMA_1183AE2	hybrid	domNGE	NA	NA	field	NA	NA	NA	NA	NA	NA	84.2	NA	NA	236	cm	NA	NA	Cárdenas-Marcelo, A. (2014). Productividad de híbridos comerciales y experimentales de maíz en tres localidades del Estado de México. UNAM.
maize	97	cardenas-marcelo_2014	702	zea_mays	H-52	hybrid	domNGE	NA	NA	field	NA	NA	NA	NA	22.5	%	80.15	NA	NA	243	cm	NA	NA	Cárdenas-Marcelo, A. (2014). Productividad de híbridos comerciales y experimentales de maíz en tres localidades del Estado de México. UNAM.
maize	97	cardenas-marcelo_2014	703	zea_mays	PUMA_1075	hybrid	domNGE	NA	NA	field	NA	NA	NA	NA	NA	NA	83.1	NA	NA	229	cm	NA	NA	Cárdenas-Marcelo, A. (2014). Productividad de híbridos comerciales y experimentales de maíz en tres localidades del Estado de México. UNAM.
maize	97	cardenas-marcelo_2014	704	zea_mays	H-53_AE1	hybrid	domNGE	NA	NA	field	NA	NA	NA	NA	NA	NA	86	NA	NA	220	cm	NA	NA	Cárdenas-Marcelo, A. (2014). Productividad de híbridos comerciales y experimentales de maíz en tres localidades del Estado de México. UNAM.
maize	97	cardenas-marcelo_2014	705	zea_mays	PUMA_1183AE1	hybrid	domNGE	NA	NA	field	NA	NA	NA	NA	NA	NA	80	NA	NA	237	cm	NA	NA	Cárdenas-Marcelo, A. (2014). Productividad de híbridos comerciales y experimentales de maíz en tres localidades del Estado de México. UNAM.
maize	97	cardenas-marcelo_2014	706	zea_mays	ASPROS_723	hybrid	domNGE	NA	NA	field	NA	NA	NA	NA	NA	NA	83.1	NA	NA	255	cm	NA	NA	Cárdenas-Marcelo, A. (2014). Productividad de híbridos comerciales y experimentales de maíz en tres localidades del Estado de México. UNAM.
maize	97	cardenas-marcelo_2014	707	zea_mays	CROMO_SEED	hybrid	domNGE	NA	NA	field	NA	NA	NA	NA	NA	NA	83	NA	NA	258	cm	NA	NA	Cárdenas-Marcelo, A. (2014). Productividad de híbridos comerciales y experimentales de maíz en tres localidades del Estado de México. UNAM.
maize	97	cardenas-marcelo_2014	708	zea_mays	B_DE_LA_FEDE	hybrid	domNGE	NA	NA	field	NA	NA	NA	NA	NA	NA	82	NA	NA	272	cm	NA	NA	Cárdenas-Marcelo, A. (2014). Productividad de híbridos comerciales y experimentales de maíz en tres localidades del Estado de México. UNAM.
maize	97	cardenas-marcelo_2014	709	zea_mays	VN_IXTLA	hybrid	domNGE	NA	NA	field	NA	NA	NA	NA	NA	NA	80.5	NA	NA	229	cm	NA	NA	Cárdenas-Marcelo, A. (2014). Productividad de híbridos comerciales y experimentales de maíz en tres localidades del Estado de México. UNAM.
maize	97	cardenas-marcelo_2014	710	zea_mays	PUMA_1076	hybrid	domNGE	NA	NA	field	NA	NA	NA	NA	NA	NA	82	NA	NA	270	cm	NA	NA	Cárdenas-Marcelo, A. (2014). Productividad de híbridos comerciales y experimentales de maíz en tres localidades del Estado de México. UNAM.
maize	98	luna-vera_2008	711	zea_mays	109x421	hybrid	domNGE	NA	NA	field	NA	NA	NA	NA	NA	NA	NA	NA	NA	221	cm	NA	NA	Luna-Vera, A. M. (2008). Productividad de híbridos obtenidos de cruzas elite de textura dentada por líneas de maíz palomero. UNAM.
maize	98	luna-vera_2008	712	zea_mays	153x195	hybrid	domNGE	NA	NA	field	NA	NA	NA	NA	NA	NA	NA	NA	NA	195	cm	NA	NA	Luna-Vera, A. M. (2008). Productividad de híbridos obtenidos de cruzas elite de textura dentada por líneas de maíz palomero. UNAM.
maize	98	luna-vera_2008	713	zea_mays	156x195	hybrid	domNGE	NA	NA	field	NA	NA	NA	NA	NA	NA	NA	NA	NA	221	cm	NA	NA	Luna-Vera, A. M. (2008). Productividad de híbridos obtenidos de cruzas elite de textura dentada por líneas de maíz palomero. UNAM.
maize	98	luna-vera_2008	714	zea_mays	157x195	hybrid	domNGE	NA	NA	field	NA	NA	NA	NA	NA	NA	NA	NA	NA	219	cm	NA	NA	Luna-Vera, A. M. (2008). Productividad de híbridos obtenidos de cruzas elite de textura dentada por líneas de maíz palomero. UNAM.
maize	98	luna-vera_2008	715	zea_mays	175x421	hybrid	domNGE	NA	NA	field	NA	NA	NA	NA	NA	NA	NA	NA	NA	232	cm	NA	NA	Luna-Vera, A. M. (2008). Productividad de híbridos obtenidos de cruzas elite de textura dentada por líneas de maíz palomero. UNAM.
maize	98	luna-vera_2008	716	zea_mays	162x421	hybrid	domNGE	NA	NA	field	NA	NA	NA	NA	NA	NA	NA	NA	NA	227	cm	NA	NA	Luna-Vera, A. M. (2008). Productividad de híbridos obtenidos de cruzas elite de textura dentada por líneas de maíz palomero. UNAM.
maize	98	luna-vera_2008	717	zea_mays	162x195	hybrid	domNGE	NA	NA	field	NA	NA	NA	NA	NA	NA	NA	NA	NA	221	cm	NA	NA	Luna-Vera, A. M. (2008). Productividad de híbridos obtenidos de cruzas elite de textura dentada por líneas de maíz palomero. UNAM.
maize	98	luna-vera_2008	718	zea_mays	174x195	hybrid	domNGE	NA	NA	field	NA	NA	NA	NA	NA	NA	NA	NA	NA	209	cm	NA	NA	Luna-Vera, A. M. (2008). Productividad de híbridos obtenidos de cruzas elite de textura dentada por líneas de maíz palomero. UNAM.
maize	98	luna-vera_2008	719	zea_mays	H-51AE	hybrid	domNGE	NA	NA	field	NA	NA	NA	NA	NA	NA	NA	NA	NA	245	cm	NA	NA	Luna-Vera, A. M. (2008). Productividad de híbridos obtenidos de cruzas elite de textura dentada por líneas de maíz palomero. UNAM.
maize	98	luna-vera_2008	720	zea_mays	H-49AE	hybrid	domNGE	NA	NA	field	NA	NA	NA	NA	NA	NA	NA	NA	NA	253	cm	NA	NA	Luna-Vera, A. M. (2008). Productividad de híbridos obtenidos de cruzas elite de textura dentada por líneas de maíz palomero. UNAM.
maize	98	luna-vera_2008	721	zea_mays	PUMA_1167	hybrid	domNGE	NA	NA	field	NA	NA	NA	NA	NA	NA	NA	NA	NA	263	cm	NA	NA	Luna-Vera, A. M. (2008). Productividad de híbridos obtenidos de cruzas elite de textura dentada por líneas de maíz palomero. UNAM.
maize	99	martinez-nuñez_2014	722	zea_mays	TSIRI_PUMA2	hybrid	domNGE	NA	NA	field	NA	NA	NA	NA	NA	NA	81	NA	NA	238	cm	NA	NA	Martínez-Núñez, B. (2014). Comparación de la capacidad productiva de versiones androestéril y fértil de nuevos híbridos de maíz. UNAM.
maize	99	martinez-nuñez_2014	723	zea_mays	H-47AE	hybrid	domNGE	NA	NA	field	NA	NA	NA	NA	NA	NA	80.5	NA	NA	236	cm	NA	NA	Martínez-Núñez, B. (2014). Comparación de la capacidad productiva de versiones androestéril y fértil de nuevos híbridos de maíz. UNAM.
maize	99	martinez-nuñez_2014	724	zea_mays	TSIRI_PUMA3	hybrid	domNGE	NA	NA	field	NA	NA	NA	NA	NA	NA	80	NA	NA	231	cm	NA	NA	Martínez-Núñez, B. (2014). Comparación de la capacidad productiva de versiones androestéril y fértil de nuevos híbridos de maíz. UNAM.
maize	99	martinez-nuñez_2014	725	zea_mays	PUMA_1183AEC2	hybrid	domNGE	NA	NA	field	NA	NA	NA	NA	NA	NA	81.5	NA	NA	225	cm	NA	NA	Martínez-Núñez, B. (2014). Comparación de la capacidad productiva de versiones androestéril y fértil de nuevos híbridos de maíz. UNAM.
maize	99	martinez-nuñez_2014	726	zea_mays	PUMA_1183AEC1	hybrid	domNGE	NA	NA	field	NA	NA	NA	NA	NA	NA	84.5	NA	NA	222	cm	NA	NA	Martínez-Núñez, B. (2014). Comparación de la capacidad productiva de versiones androestéril y fértil de nuevos híbridos de maíz. UNAM.
maize	100	cosme-tellez_2008	727	zea_mays	PUMA_1075	hybrid	domNGE	NA	NA	field	NA	NA	NA	NA	NA	NA	85.5	NA	NA	245	cm	NA	NA	Tellez, C. (2008). Productividad de híbridos de maíz de Valles Altos obtenidos con semillas de progenitores fértiles y androestériles. UNAM.
maize	100	cosme-tellez_2008	728	zea_mays	PUMA_1076	hybrid	domNGE	NA	NA	field	NA	NA	NA	NA	NA	NA	85	NA	NA	248	cm	NA	NA	Tellez, C. (2008). Productividad de híbridos de maíz de Valles Altos obtenidos con semillas de progenitores fértiles y androestériles. UNAM.
maize	100	cosme-tellez_2008	729	zea_mays	H-48	hybrid	domNGE	NA	NA	field	NA	NA	NA	NA	NA	NA	83	NA	NA	259	cm	NA	NA	Tellez, C. (2008). Productividad de híbridos de maíz de Valles Altos obtenidos con semillas de progenitores fértiles y androestériles. UNAM.
maize	100	cosme-tellez_2008	730	zea_mays	H-50	hybrid	domNGE	NA	NA	field	NA	NA	NA	NA	NA	NA	83.5	NA	NA	238	cm	NA	NA	Tellez, C. (2008). Productividad de híbridos de maíz de Valles Altos obtenidos con semillas de progenitores fértiles y androestériles. UNAM.
maize	101	salazar-hernadez_2008	731	zea_mays	P-1181	hybrid	domNGE	NA	NA	field	NA	NA	NA	NA	NA	NA	76.5	NA	NA	238	cm	NA	NA	Salazar-Hernández, D. (2008). Evaluación productiva de híbridos fértiles, normales de fertilidad restaurada y androestériles de maíz (Zea mays L.) de Valles Altos. UNAM.
maize	101	salazar-hernadez_2008	732	zea_mays	244AExIA49	hybrid	domNGE	NA	NA	field	NA	NA	NA	NA	NA	NA	81	NA	NA	238	cm	NA	NA	Salazar-Hernández, D. (2008). Evaluación productiva de híbridos fértiles, normales de fertilidad restaurada y androestériles de maíz (Zea mays L.) de Valles Altos. UNAM.
maize	101	salazar-hernadez_2008	733	zea_mays	244Ax349xIA19	hybrid	domNGE	NA	NA	field	NA	NA	NA	NA	NA	NA	80	NA	NA	236	cm	NA	NA	Salazar-Hernández, D. (2008). Evaluación productiva de híbridos fértiles, normales de fertilidad restaurada y androestériles de maíz (Zea mays L.) de Valles Altos. UNAM.
maize	101	salazar-hernadez_2008	734	zea_mays	H-48F	hybrid	domNGE	NA	NA	field	NA	NA	NA	NA	NA	NA	78	NA	NA	230	cm	NA	NA	Salazar-Hernández, D. (2008). Evaluación productiva de híbridos fértiles, normales de fertilidad restaurada y androestériles de maíz (Zea mays L.) de Valles Altos. UNAM.
maize	101	salazar-hernadez_2008	735	zea_mays	H-49AE	hybrid	domNGE	NA	NA	field	NA	NA	NA	NA	NA	NA	80.5	NA	NA	224	cm	NA	NA	Salazar-Hernández, D. (2008). Evaluación productiva de híbridos fértiles, normales de fertilidad restaurada y androestériles de maíz (Zea mays L.) de Valles Altos. UNAM.
maize	101	salazar-hernadez_2008	736	zea_mays	H-50AEB	hybrid	domNGE	NA	NA	field	NA	NA	NA	NA	NA	NA	80	NA	NA	226	cm	NA	NA	Salazar-Hernández, D. (2008). Evaluación productiva de híbridos fértiles, normales de fertilidad restaurada y androestériles de maíz (Zea mays L.) de Valles Altos. UNAM.
maize	101	salazar-hernadez_2008	737	zea_mays	244AExIA19	hybrid	domNGE	NA	NA	field	NA	NA	NA	NA	NA	NA	77.5	NA	NA	230	cm	NA	NA	Salazar-Hernández, D. (2008). Evaluación productiva de híbridos fértiles, normales de fertilidad restaurada y androestériles de maíz (Zea mays L.) de Valles Altos. UNAM.
maize	101	salazar-hernadez_2008	738	zea_mays	H-48AER	hybrid	domNGE	NA	NA	field	NA	NA	NA	NA	NA	NA	76.5	NA	NA	234	cm	NA	NA	Salazar-Hernández, D. (2008). Evaluación productiva de híbridos fértiles, normales de fertilidad restaurada y androestériles de maíz (Zea mays L.) de Valles Altos. UNAM.
maize	101	salazar-hernadez_2008	739	zea_mays	244AExIA91	hybrid	domNGE	NA	NA	field	NA	NA	NA	NA	NA	NA	81	NA	NA	231	cm	NA	NA	Salazar-Hernández, D. (2008). Evaluación productiva de híbridos fértiles, normales de fertilidad restaurada y androestériles de maíz (Zea mays L.) de Valles Altos. UNAM.
maize	101	salazar-hernadez_2008	740	zea_mays	244X349XIATOLSOL	hybrid	domNGE	NA	NA	field	NA	NA	NA	NA	NA	NA	75	NA	NA	232	cm	NA	NA	Salazar-Hernández, D. (2008). Evaluación productiva de híbridos fértiles, normales de fertilidad restaurada y androestériles de maíz (Zea mays L.) de Valles Altos. UNAM.
maize	101	salazar-hernadez_2008	741	zea_mays	242X246XIA19	hybrid	domNGE	NA	NA	field	NA	NA	NA	NA	NA	NA	76.5	NA	NA	238	cm	NA	NA	Salazar-Hernández, D. (2008). Evaluación productiva de híbridos fértiles, normales de fertilidad restaurada y androestériles de maíz (Zea mays L.) de Valles Altos. UNAM.
maize	101	salazar-hernadez_2008	742	zea_mays	244FXIA91	hybrid	domNGE	NA	NA	field	NA	NA	NA	NA	NA	NA	77	NA	NA	207	cm	NA	NA	Salazar-Hernández, D. (2008). Evaluación productiva de híbridos fértiles, normales de fertilidad restaurada y androestériles de maíz (Zea mays L.) de Valles Altos. UNAM.
maize	101	salazar-hernadez_2008	743	zea_mays	H-153F	hybrid	domNGE	NA	NA	field	NA	NA	NA	NA	NA	NA	75.5	NA	NA	220	cm	NA	NA	Salazar-Hernández, D. (2008). Evaluación productiva de híbridos fértiles, normales de fertilidad restaurada y androestériles de maíz (Zea mays L.) de Valles Altos. UNAM.
maize	101	salazar-hernadez_2008	744	zea_mays	H-48AE	hybrid	domNGE	NA	NA	field	NA	NA	NA	NA	NA	NA	74	NA	NA	234	cm	NA	NA	Salazar-Hernández, D. (2008). Evaluación productiva de híbridos fértiles, normales de fertilidad restaurada y androestériles de maíz (Zea mays L.) de Valles Altos. UNAM.
maize	101	salazar-hernadez_2008	745	zea_mays	H-33	hybrid	domNGE	NA	NA	field	NA	NA	NA	NA	NA	NA	78	NA	NA	227	cm	NA	NA	Salazar-Hernández, D. (2008). Evaluación productiva de híbridos fértiles, normales de fertilidad restaurada y androestériles de maíz (Zea mays L.) de Valles Altos. UNAM.
maize	101	salazar-hernadez_2008	746	zea_mays	H-48AE	hybrid	domNGE	NA	NA	field	NA	NA	NA	NA	NA	NA	75.5	NA	NA	230	cm	NA	NA	Salazar-Hernández, D. (2008). Evaluación productiva de híbridos fértiles, normales de fertilidad restaurada y androestériles de maíz (Zea mays L.) de Valles Altos. UNAM.
maize	102	serrano-reyes_2008	747	zea_mays	PUMA_1075	hybrid	domNGE	NA	NA	field	NA	NA	NA	NA	NA	NA	78.5	NA	NA	238	cm	NA	NA	Serrano-Reyes, J. (2008). Productividad de diferentes mezclas de semilla androestéril y fértil de híbridos puma de maíz en dos fechas de siembra. UNAM.
maize	102	serrano-reyes_2008	748	zea_mays	PUMA_1076	hybrid	domNGE	NA	NA	field	NA	NA	NA	NA	NA	NA	78.5	NA	NA	215	cm	NA	NA	Serrano-Reyes, J. (2008). Productividad de diferentes mezclas de semilla androestéril y fértil de híbridos puma de maíz en dos fechas de siembra. UNAM.
maize	103	hernandez-zarate_1994	749	zea_mays	T37XR35	hybrid	domNGE	NA	NA	field	NA	NA	NA	NA	NA	NA	NA	NA	NA	195	cm	NA	NA	Hernández-Zárate, J. F. (1994). Comparación de variedades mejoradas de maíz (Zea mays L.) por su rendimiento y calidad de semilla en la localidad de San Martín Otzoloapan, México. UNAM.
maize	103	hernandez-zarate_1994	750	zea_mays	H-434E	hybrid	domNGE	NA	NA	field	390	total_number	NA	NA	NA	NA	80	NA	NA	198	cm	NA	NA	Hernández-Zárate, J. F. (1994). Comparación de variedades mejoradas de maíz (Zea mays L.) por su rendimiento y calidad de semilla en la localidad de San Martín Otzoloapan, México. UNAM.
maize	103	hernandez-zarate_1994	751	zea_mays	blanco_dentado	hybrid	domNGE	NA	NA	field	434	total_number	NA	NA	NA	NA	88.5	NA	NA	163	cm	NA	NA	Hernández-Zárate, J. F. (1994). Comparación de variedades mejoradas de maíz (Zea mays L.) por su rendimiento y calidad de semilla en la localidad de San Martín Otzoloapan, México. UNAM.
maize	103	hernandez-zarate_1994	752	zea_mays	H-433	hybrid	domNGE	NA	NA	field	390	total_number	NA	NA	NA	NA	78	NA	NA	184	cm	NA	NA	Hernández-Zárate, J. F. (1994). Comparación de variedades mejoradas de maíz (Zea mays L.) por su rendimiento y calidad de semilla en la localidad de San Martín Otzoloapan, México. UNAM.
maize	103	hernandez-zarate_1994	753	zea_mays	B-833	hybrid	domNGE	NA	NA	field	459	total_number	NA	NA	NA	NA	94	NA	NA	240	cm	NA	NA	Hernández-Zárate, J. F. (1994). Comparación de variedades mejoradas de maíz (Zea mays L.) por su rendimiento y calidad de semilla en la localidad de San Martín Otzoloapan, México. UNAM.
maize	103	hernandez-zarate_1994	754	zea_mays	H-135	hybrid	domNGE	NA	NA	field	476	total_number	NA	NA	NA	NA	78.5	NA	NA	254	cm	NA	NA	Hernández-Zárate, J. F. (1994). Comparación de variedades mejoradas de maíz (Zea mays L.) por su rendimiento y calidad de semilla en la localidad de San Martín Otzoloapan, México. UNAM.
maize	103	hernandez-zarate_1994	755	zea_mays	B-850	hybrid	domNGE	NA	NA	field	420	total_number	NA	NA	NA	NA	55	NA	NA	232	cm	NA	NA	Hernández-Zárate, J. F. (1994). Comparación de variedades mejoradas de maíz (Zea mays L.) por su rendimiento y calidad de semilla en la localidad de San Martín Otzoloapan, México. UNAM.
maize	103	hernandez-zarate_1994	756	zea_mays	B-810	hybrid	domNGE	NA	NA	field	465	total_number	NA	NA	NA	NA	83	NA	NA	226	cm	NA	NA	Hernández-Zárate, J. F. (1994). Comparación de variedades mejoradas de maíz (Zea mays L.) por su rendimiento y calidad de semilla en la localidad de San Martín Otzoloapan, México. UNAM.
maize	103	hernandez-zarate_1994	757	zea_mays	V-531	hybrid	domNGE	NA	NA	field	420	total_number	NA	NA	NA	NA	77.5	NA	NA	190	cm	NA	NA	Hernández-Zárate, J. F. (1994). Comparación de variedades mejoradas de maíz (Zea mays L.) por su rendimiento y calidad de semilla en la localidad de San Martín Otzoloapan, México. UNAM.
maize	103	hernandez-zarate_1994	758	zea_mays	H-311	hybrid	domNGE	NA	NA	field	408	total_number	NA	NA	NA	NA	100	NA	NA	225	cm	NA	NA	Hernández-Zárate, J. F. (1994). Comparación de variedades mejoradas de maíz (Zea mays L.) por su rendimiento y calidad de semilla en la localidad de San Martín Otzoloapan, México. UNAM.
maize	103	hernandez-zarate_1994	759	zea_mays	B-16XB-17	hybrid	domNGE	NA	NA	field	315	total_number	NA	NA	NA	NA	72	NA	NA	128	cm	NA	NA	Hernández-Zárate, J. F. (1994). Comparación de variedades mejoradas de maíz (Zea mays L.) por su rendimiento y calidad de semilla en la localidad de San Martín Otzoloapan, México. UNAM.
maize	103	hernandez-zarate_1994	760	zea_mays	B-830	hybrid	domNGE	NA	NA	field	435	total_number	NA	NA	NA	NA	85	NA	NA	197	cm	NA	NA	Hernández-Zárate, J. F. (1994). Comparación de variedades mejoradas de maíz (Zea mays L.) por su rendimiento y calidad de semilla en la localidad de San Martín Otzoloapan, México. UNAM.
maize	103	hernandez-zarate_1994	761	zea_mays	M-355	hybrid	domNGE	NA	NA	field	406	total_number	NA	NA	NA	NA	70	NA	NA	242	cm	NA	NA	Hernández-Zárate, J. F. (1994). Comparación de variedades mejoradas de maíz (Zea mays L.) por su rendimiento y calidad de semilla en la localidad de San Martín Otzoloapan, México. UNAM.
maize	103	hernandez-zarate_1994	762	zea_mays	B-840	hybrid	domNGE	NA	NA	field	448	total_number	NA	NA	NA	NA	NA	NA	NA	235	cm	NA	NA	Hernández-Zárate, J. F. (1994). Comparación de variedades mejoradas de maíz (Zea mays L.) por su rendimiento y calidad de semilla en la localidad de San Martín Otzoloapan, México. UNAM.
maize	103	hernandez-zarate_1994	763	zea_mays	V-535	hybrid	domNGE	NA	NA	field	420	total_number	NA	NA	NA	NA	47	NA	NA	222	cm	NA	NA	Hernández-Zárate, J. F. (1994). Comparación de variedades mejoradas de maíz (Zea mays L.) por su rendimiento y calidad de semilla en la localidad de San Martín Otzoloapan, México. UNAM.
maize	103	hernandez-zarate_1994	764	zea_mays	VS-529	hybrid	domNGE	NA	NA	field	392	total_number	NA	NA	NA	NA	74	NA	NA	219	cm	NA	NA	Hernández-Zárate, J. F. (1994). Comparación de variedades mejoradas de maíz (Zea mays L.) por su rendimiento y calidad de semilla en la localidad de San Martín Otzoloapan, México. UNAM.
maize	103	hernandez-zarate_1994	765	zea_mays	HV-313	hybrid	domNGE	NA	NA	field	420	total_number	NA	NA	NA	NA	66	NA	NA	206	cm	NA	NA	Hernández-Zárate, J. F. (1994). Comparación de variedades mejoradas de maíz (Zea mays L.) por su rendimiento y calidad de semilla en la localidad de San Martín Otzoloapan, México. UNAM.
maize	103	hernandez-zarate_1994	766	zea_mays	Criollo	hybrid	domNGE	NA	NA	field	384	total_number	NA	NA	NA	NA	82	NA	NA	274	cm	NA	NA	Hernández-Zárate, J. F. (1994). Comparación de variedades mejoradas de maíz (Zea mays L.) por su rendimiento y calidad de semilla en la localidad de San Martín Otzoloapan, México. UNAM.
maize	103	hernandez-zarate_1994	767	zea_mays	M-36XM-37	hybrid	domNGE	NA	NA	field	442	total_number	NA	NA	NA	NA	71.5	NA	NA	204	cm	NA	NA	Hernández-Zárate, J. F. (1994). Comparación de variedades mejoradas de maíz (Zea mays L.) por su rendimiento y calidad de semilla en la localidad de San Martín Otzoloapan, México. UNAM.
maize	103	hernandez-zarate_1994	768	zea_mays	H-419	hybrid	domNGE	NA	NA	field	NA	NA	NA	NA	NA	NA	NA	NA	NA	250	cm	NA	NA	Hernández-Zárate, J. F. (1994). Comparación de variedades mejoradas de maíz (Zea mays L.) por su rendimiento y calidad de semilla en la localidad de San Martín Otzoloapan, México. UNAM.
maize	103	hernandez-zarate_1994	769	zea_mays	0-356	hybrid	domNGE	NA	NA	field	476	total_number	NA	NA	NA	NA	NA	NA	NA	234	cm	NA	NA	Hernández-Zárate, J. F. (1994). Comparación de variedades mejoradas de maíz (Zea mays L.) por su rendimiento y calidad de semilla en la localidad de San Martín Otzoloapan, México. UNAM.
maize	103	hernandez-zarate_1994	770	zea_mays	H-422	hybrid	domNGE	NA	NA	field	400	total_number	NA	NA	NA	NA	69	NA	NA	203	cm	NA	NA	Hernández-Zárate, J. F. (1994). Comparación de variedades mejoradas de maíz (Zea mays L.) por su rendimiento y calidad de semilla en la localidad de San Martín Otzoloapan, México. UNAM.
maize	103	hernandez-zarate_1994	771	zea_mays	lucio_blanco	hybrid	domNGE	NA	NA	field	352	total_number	NA	NA	NA	NA	60.5	NA	NA	142	cm	NA	NA	Hernández-Zárate, J. F. (1994). Comparación de variedades mejoradas de maíz (Zea mays L.) por su rendimiento y calidad de semilla en la localidad de San Martín Otzoloapan, México. UNAM.
maize	103	hernandez-zarate_1994	772	zea_mays	M-355	hybrid	domNGE	NA	NA	field	NA	NA	NA	NA	NA	NA	86.5	NA	NA	203	cm	NA	NA	Hernández-Zárate, J. F. (1994). Comparación de variedades mejoradas de maíz (Zea mays L.) por su rendimiento y calidad de semilla en la localidad de San Martín Otzoloapan, México. UNAM.
maize	103	hernandez-zarate_1994	773	zea_mays	B-34	hybrid	domNGE	NA	NA	field	NA	NA	NA	NA	98	%	77.5	NA	NA	167	cm	NA	NA	Hernández-Zárate, J. F. (1994). Comparación de variedades mejoradas de maíz (Zea mays L.) por su rendimiento y calidad de semilla en la localidad de San Martín Otzoloapan, México. UNAM.
maize	104	martinez-loeza_1987	774	zea_mays	CPS-V-191	hybrid	domNGE	NA	NA	field	NA	NA	NA	NA	NA	NA	NA	NA	NA	NA	NA	NA	NA	Martinez-Loeza, A. (1987). Comportamiento de la germinación y el vigor de la plántula en líneas e híbridos de maíz (Zea mays L.) como respuesta al envejecimiento acelerado de semillas. UNAM.
maize	105	cotera-guillen_1995	775	zea_mays	Santiago_Yeche	hybrid	domNGE	NA	NA	field	NA	NA	NA	NA	NA	NA	NA	NA	NA	NA	NA	NA	NA	Cotera-Guillén, J. M. (1997). Germinación y vigor en tres tamaños de semilla de frijo y maíz. UNAM.
maize	105	cotera-guillen_1995	776	zea_mays	VS-11	hybrid	domNGE	NA	NA	field	NA	NA	NA	NA	NA	NA	NA	NA	NA	NA	NA	NA	NA	Cotera-Guillén, J. M. (1997). Germinación y vigor en tres tamaños de semilla de frijo y maíz. UNAM.
maize	105	cotera-guillen_1995	777	zea_mays	C-118	hybrid	domNGE	NA	NA	field	NA	NA	NA	NA	NA	NA	NA	NA	NA	NA	NA	NA	NA	Cotera-Guillén, J. M. (1997). Germinación y vigor en tres tamaños de semilla de frijo y maíz. UNAM.
maize	106	cruz-garcia_1995	778	zea_mays	PUMA_1157	hybrid	domNGE	NA	NA	field	540	total_number	NA	NA	NA	NA	102	NA	NA	259	cm	NA	NA	Cruz-García, P. (1995). Capacidad productiva de maíz de riego bajo dos densidades de población en el Valle del Mezquital. UNAM.
maize	106	cruz-garcia_1995	779	zea_mays	H-149	hybrid	domNGE	NA	NA	field	594	total_number	NA	NA	NA	NA	103	NA	NA	302	cm	NA	NA	Cruz-García, P. (1995). Capacidad productiva de maíz de riego bajo dos densidades de población en el Valle del Mezquital. UNAM.
maize	106	cruz-garcia_1995	780	zea_mays	H-135	hybrid	domNGE	NA	NA	field	592	total_number	NA	NA	NA	NA	101	NA	NA	274	cm	NA	NA	Cruz-García, P. (1995). Capacidad productiva de maíz de riego bajo dos densidades de población en el Valle del Mezquital. UNAM.
maize	106	cruz-garcia_1995	781	zea_mays	A-791	hybrid	domNGE	NA	NA	field	504	total_number	NA	NA	NA	NA	106	NA	NA	256	cm	NA	NA	Cruz-García, P. (1995). Capacidad productiva de maíz de riego bajo dos densidades de población en el Valle del Mezquital. UNAM.
maize	106	cruz-garcia_1995	782	zea_mays	A-7520	hybrid	domNGE	NA	NA	field	576	total_number	NA	NA	NA	NA	107	NA	NA	240	cm	NA	NA	Cruz-García, P. (1995). Capacidad productiva de maíz de riego bajo dos densidades de población en el Valle del Mezquital. UNAM.
maize	106	cruz-garcia_1995	783	zea_mays	jornalero	hybrid	domNGE	NA	NA	field	540	total_number	NA	NA	NA	NA	87.5	NA	NA	263	cm	NA	NA	Cruz-García, P. (1995). Capacidad productiva de maíz de riego bajo dos densidades de población en el Valle del Mezquital. UNAM.
maize	106	cruz-garcia_1995	784	zea_mays	AN-447	hybrid	domNGE	NA	NA	field	490	total_number	NA	NA	NA	NA	108	NA	NA	252	cm	NA	NA	Cruz-García, P. (1995). Capacidad productiva de maíz de riego bajo dos densidades de población en el Valle del Mezquital. UNAM.
maize	106	cruz-garcia_1995	785	zea_mays	A-773	hybrid	domNGE	NA	NA	field	434	total_number	NA	NA	NA	NA	107.5	NA	NA	266	cm	NA	NA	Cruz-García, P. (1995). Capacidad productiva de maíz de riego bajo dos densidades de población en el Valle del Mezquital. UNAM.
maize	106	cruz-garcia_1995	786	zea_mays	B-844	hybrid	domNGE	NA	NA	field	585	total_number	NA	NA	NA	NA	110	NA	NA	248	cm	NA	NA	Cruz-García, P. (1995). Capacidad productiva de maíz de riego bajo dos densidades de población en el Valle del Mezquital. UNAM.
maize	106	cruz-garcia_1995	787	zea_mays	B-445	hybrid	domNGE	NA	NA	field	462	total_number	NA	NA	NA	NA	103	NA	NA	234	cm	NA	NA	Cruz-García, P. (1995). Capacidad productiva de maíz de riego bajo dos densidades de población en el Valle del Mezquital. UNAM.
maize	106	cruz-garcia_1995	788	zea_mays	D-856	hybrid	domNGE	NA	NA	field	455	total_number	NA	NA	NA	NA	111	NA	NA	212	cm	NA	NA	Cruz-García, P. (1995). Capacidad productiva de maíz de riego bajo dos densidades de población en el Valle del Mezquital. UNAM.
maize	106	cruz-garcia_1995	789	zea_mays	H-311	hybrid	domNGE	NA	NA	field	561	total_number	NA	NA	78.5	%	104.5	NA	NA	243	cm	NA	NA	Cruz-García, P. (1995). Capacidad productiva de maíz de riego bajo dos densidades de población en el Valle del Mezquital. UNAM.
maize	106	cruz-garcia_1995	790	zea_mays	B-830	hybrid	domNGE	NA	NA	field	510	total_number	NA	NA	NA	NA	113.5	NA	NA	193	cm	NA	NA	Cruz-García, P. (1995). Capacidad productiva de maíz de riego bajo dos densidades de población en el Valle del Mezquital. UNAM.
maize	107	guzman-maximo_2005	791	zea_mays	CS-152	hybrid	domNGE	NA	NA	field	NA	NA	NA	NA	NA	NA	80	NA	NA	193	cm	NA	NA	Guzmán-Máximo, R. (2015). Productividad de híbridos varietales de maíz de grano amarillo para condiciones de mediana productividad en Valles Altos. UNAM.
maize	107	guzman-maximo_2005	792	zea_mays	CS-156	hybrid	domNGE	NA	NA	field	NA	NA	NA	NA	NA	NA	30	NA	NA	208	cm	NA	NA	Guzmán-Máximo, R. (2015). Productividad de híbridos varietales de maíz de grano amarillo para condiciones de mediana productividad en Valles Altos. UNAM.
maize	107	guzman-maximo_2005	793	zea_mays	V-53A	hybrid	domNGE	NA	NA	field	NA	NA	NA	NA	NA	NA	76.5	NA	NA	193	cm	NA	NA	Guzmán-Máximo, R. (2015). Productividad de híbridos varietales de maíz de grano amarillo para condiciones de mediana productividad en Valles Altos. UNAM.
maize	107	guzman-maximo_2005	794	zea_mays	V-54A	hybrid	domNGE	NA	NA	field	NA	NA	NA	NA	NA	NA	75.5	NA	NA	187	cm	NA	NA	Guzmán-Máximo, R. (2015). Productividad de híbridos varietales de maíz de grano amarillo para condiciones de mediana productividad en Valles Altos. UNAM.
maize	107	guzman-maximo_2005	795	zea_mays	V-55A	hybrid	domNGE	NA	NA	field	NA	NA	NA	NA	NA	NA	75	NA	NA	220	cm	NA	NA	Guzmán-Máximo, R. (2015). Productividad de híbridos varietales de maíz de grano amarillo para condiciones de mediana productividad en Valles Altos. UNAM.
maize	107	guzman-maximo_2005	796	zea_mays	oro_ultra_3C	hybrid	domNGE	NA	NA	field	NA	NA	NA	NA	NA	NA	75.5	NA	NA	159	cm	NA	NA	Guzmán-Máximo, R. (2015). Productividad de híbridos varietales de maíz de grano amarillo para condiciones de mediana productividad en Valles Altos. UNAM.
maize	107	guzman-maximo_2005	797	zea_mays	oro_ultra_2C	hybrid	domNGE	NA	NA	field	NA	NA	NA	NA	NA	NA	80.5	NA	NA	161	cm	NA	NA	Guzmán-Máximo, R. (2015). Productividad de híbridos varietales de maíz de grano amarillo para condiciones de mediana productividad en Valles Altos. UNAM.
maize	107	guzman-maximo_2005	798	zea_mays	oro_plus_2D	hybrid	domNGE	NA	NA	field	NA	NA	NA	NA	NA	NA	78	NA	NA	157	cm	NA	NA	Guzmán-Máximo, R. (2015). Productividad de híbridos varietales de maíz de grano amarillo para condiciones de mediana productividad en Valles Altos. UNAM.
maize	108	rodriguez-flores_2004	799	zea_mays	NA	teocintle	wild	NA	NA	controlled	NA	NA	NA	NA	NA	NA	63.5	NA	NA	137	cm	NA	NA	Rodriguez-Flores, J. G. (2004). Biología de polen y estigmas en especies de Zea. Universidad de Guadalajara.
maize	108	rodriguez-flores_2004	800	zea_mays_sub_parviglumis	NA	teocintle	wild	NA	NA	controlled	NA	NA	NA	NA	NA	NA	75	NA	NA	125	cm	NA	NA	Rodriguez-Flores, J. G. (2004). Biología de polen y estigmas en especies de Zea. Universidad de Guadalajara.
maize	108	rodriguez-flores_2004	801	zea_mays_sub_mexicana	NA	teocintle	wild	NA	NA	controlled	NA	NA	NA	NA	NA	NA	56.5	NA	NA	145	cm	NA	NA	Rodriguez-Flores, J. G. (2004). Biología de polen y estigmas en especies de Zea. Universidad de Guadalajara.
maize	108	rodriguez-flores_2004	802	zea_mays_sub_mexicana	NA	teocintle	wild	NA	NA	controlled	NA	NA	NA	NA	NA	NA	53	NA	NA	150	cm	NA	NA	Rodriguez-Flores, J. G. (2004). Biología de polen y estigmas en especies de Zea. Universidad de Guadalajara.
maize	108	rodriguez-flores_2004	803	zea_mays	NA	hybrid	domNGE	NA	NA	controlled	NA	NA	NA	NA	NA	NA	61	NA	NA	240	cm	NA	NA	Rodriguez-Flores, J. G. (2004). Biología de polen y estigmas en especies de Zea. Universidad de Guadalajara.
maize	108	rodriguez-flores_2004	804	zea_mays	NA	landrace	domNGE	NA	NA	controlled	NA	NA	NA	NA	NA	NA	61.5	NA	NA	230	cm	NA	NA	Rodriguez-Flores, J. G. (2004). Biología de polen y estigmas en especies de Zea. Universidad de Guadalajara.
maize	108	rodriguez-flores_2004	805	zea_mays_sub_parviglumis	NA	teocintle	wild	NA	NA	controlled	NA	NA	NA	NA	NA	NA	108.5	NA	NA	176	cm	NA	NA	Rodriguez-Flores, J. G. (2004). Biología de polen y estigmas en especies de Zea. Universidad de Guadalajara.
maize	108	rodriguez-flores_2004	806	zea_mays_sub_mexicana	NA	teocintle	wild	NA	NA	controlled	NA	NA	NA	NA	NA	NA	74	NA	NA	251	cm	NA	NA	Rodriguez-Flores, J. G. (2004). Biología de polen y estigmas en especies de Zea. Universidad de Guadalajara.
maize	108	rodriguez-flores_2004	807	zea_mays_sub_mexicana	NA	teocintle	wild	NA	NA	controlled	NA	NA	NA	NA	NA	NA	80.5	NA	NA	250	cm	NA	NA	Rodriguez-Flores, J. G. (2004). Biología de polen y estigmas en especies de Zea. Universidad de Guadalajara.
maize	108	rodriguez-flores_2004	808	zea_mays_sub_mexicana	NA	teocintle	wild	NA	NA	controlled	NA	NA	NA	NA	NA	NA	62.8	NA	NA	181	cm	NA	NA	Rodriguez-Flores, J. G. (2004). Biología de polen y estigmas en especies de Zea. Universidad de Guadalajara.
maize	108	rodriguez-flores_2004	809	zea_mays_sup_diploperenis	NA	teocintle	wild	NA	NA	controlled	NA	NA	NA	NA	NA	NA	108.5	NA	NA	176	cm	NA	NA	Rodriguez-Flores, J. G. (2004). Biología de polen y estigmas en especies de Zea. Universidad de Guadalajara.
maize	108	rodriguez-flores_2004	810	zea_mays	NA	hybrid	domNGE	NA	NA	controlled	NA	NA	NA	NA	NA	NA	75.5	NA	NA	264	cm	NA	NA	Rodriguez-Flores, J. G. (2004). Biología de polen y estigmas en especies de Zea. Universidad de Guadalajara.
maize	108	rodriguez-flores_2004	811	zea_mays	NA	landrace	domNGE	NA	NA	controlled	NA	NA	NA	NA	NA	NA	79.5	NA	NA	254	cm	NA	NA	Rodriguez-Flores, J. G. (2004). Biología de polen y estigmas en especies de Zea. Universidad de Guadalajara.
maize	108	rodriguez-flores_2004	812	zea_mays	NA	commercial_line	domNGE	NA	NA	controlled	NA	NA	NA	NA	83	%	77.5	NA	NA	243	cm	NA	NA	Rodriguez-Flores, J. G. (2004). Biología de polen y estigmas en especies de Zea. Universidad de Guadalajara.
maize	109	cabrera-toledo_2015	813	zea_mays	OAX-833	commercial_line	domNGE	NA	NA	controlled	NA	NA	NA	NA	NA	NA	48.44	NA	NA	110.38	cm	NA	NA	Cabrera-Toledo, J. M., Carballo-Carballo, A., & Aragón-Cuevas, F. (2015). Evaluación agronómica de maíces raza Zapalote chico en la región Istmeña de Oaxaca. Revista Mexicana de Ciencias Agrícolas, (11), 2075–2082.
maize	109	cabrera-toledo_2015	814	zea_mays	OAX-826	commercial_line	domNGE	NA	NA	controlled	NA	NA	NA	NA	NA	NA	52.5	NA	NA	111.38	cm	NA	NA	Cabrera-Toledo, J. M., Carballo-Carballo, A., & Aragón-Cuevas, F. (2015). Evaluación agronómica de maíces raza Zapalote chico en la región Istmeña de Oaxaca. Revista Mexicana de Ciencias Agrícolas, (11), 2075–2082.
maize	109	cabrera-toledo_2015	815	zea_mays	OAX-827	commercial_line	domNGE	NA	NA	controlled	NA	NA	NA	NA	NA	NA	49.3	NA	NA	116.88	cm	NA	NA	Cabrera-Toledo, J. M., Carballo-Carballo, A., & Aragón-Cuevas, F. (2015). Evaluación agronómica de maíces raza Zapalote chico en la región Istmeña de Oaxaca. Revista Mexicana de Ciencias Agrícolas, (11), 2075–2082.
maize	109	cabrera-toledo_2015	816	zea_mays	OAX-830	commercial_line	domNGE	NA	NA	controlled	NA	NA	NA	NA	NA	NA	49.5	NA	NA	118.38	cm	NA	NA	Cabrera-Toledo, J. M., Carballo-Carballo, A., & Aragón-Cuevas, F. (2015). Evaluación agronómica de maíces raza Zapalote chico en la región Istmeña de Oaxaca. Revista Mexicana de Ciencias Agrícolas, (11), 2075–2082.
maize	109	cabrera-toledo_2015	817	zea_mays	OAX-832	commercial_line	domNGE	NA	NA	controlled	NA	NA	NA	NA	NA	NA	49.2	NA	NA	121.88	cm	NA	NA	Cabrera-Toledo, J. M., Carballo-Carballo, A., & Aragón-Cuevas, F. (2015). Evaluación agronómica de maíces raza Zapalote chico en la región Istmeña de Oaxaca. Revista Mexicana de Ciencias Agrícolas, (11), 2075–2082.
maize	109	cabrera-toledo_2015	818	zea_mays	OAX-834	commercial_line	domNGE	NA	NA	controlled	NA	NA	NA	NA	NA	NA	48.7	NA	NA	139.88	cm	NA	NA	Cabrera-Toledo, J. M., Carballo-Carballo, A., & Aragón-Cuevas, F. (2015). Evaluación agronómica de maíces raza Zapalote chico en la región Istmeña de Oaxaca. Revista Mexicana de Ciencias Agrícolas, (11), 2075–2082.
maize	109	cabrera-toledo_2015	819	zea_mays	OAX-838	commercial_line	domNGE	NA	NA	controlled	NA	NA	NA	NA	NA	NA	48.6	NA	NA	115.5	cm	NA	NA	Cabrera-Toledo, J. M., Carballo-Carballo, A., & Aragón-Cuevas, F. (2015). Evaluación agronómica de maíces raza Zapalote chico en la región Istmeña de Oaxaca. Revista Mexicana de Ciencias Agrícolas, (11), 2075–2082.
maize	109	cabrera-toledo_2015	820	zea_mays	COL-29	commercial_line	domNGE	NA	NA	controlled	NA	NA	NA	NA	NA	NA	51	NA	NA	135.5	cm	NA	NA	Cabrera-Toledo, J. M., Carballo-Carballo, A., & Aragón-Cuevas, F. (2015). Evaluación agronómica de maíces raza Zapalote chico en la región Istmeña de Oaxaca. Revista Mexicana de Ciencias Agrícolas, (11), 2075–2082.
maize	109	cabrera-toledo_2015	821	zea_mays	COL-31	commercial_line	domNGE	NA	NA	controlled	NA	NA	NA	NA	NA	NA	52.5	NA	NA	140	cm	NA	NA	Cabrera-Toledo, J. M., Carballo-Carballo, A., & Aragón-Cuevas, F. (2015). Evaluación agronómica de maíces raza Zapalote chico en la región Istmeña de Oaxaca. Revista Mexicana de Ciencias Agrícolas, (11), 2075–2082.
maize	109	cabrera-toledo_2015	822	zea_mays	COL-32	commercial_line	domNGE	NA	NA	controlled	NA	NA	NA	NA	NA	NA	48.7	NA	NA	124.38	cm	NA	NA	Cabrera-Toledo, J. M., Carballo-Carballo, A., & Aragón-Cuevas, F. (2015). Evaluación agronómica de maíces raza Zapalote chico en la región Istmeña de Oaxaca. Revista Mexicana de Ciencias Agrícolas, (11), 2075–2082.
maize	109	cabrera-toledo_2015	823	zea_mays	COL-34	commercial_line	domNGE	NA	NA	controlled	NA	NA	NA	NA	NA	NA	46.6	NA	NA	137.88	cm	NA	NA	Cabrera-Toledo, J. M., Carballo-Carballo, A., & Aragón-Cuevas, F. (2015). Evaluación agronómica de maíces raza Zapalote chico en la región Istmeña de Oaxaca. Revista Mexicana de Ciencias Agrícolas, (11), 2075–2082.
maize	109	cabrera-toledo_2015	824	zea_mays	COL-36	commercial_line	domNGE	NA	NA	controlled	NA	NA	NA	NA	NA	NA	48.6	NA	NA	141.5	cm	NA	NA	Cabrera-Toledo, J. M., Carballo-Carballo, A., & Aragón-Cuevas, F. (2015). Evaluación agronómica de maíces raza Zapalote chico en la región Istmeña de Oaxaca. Revista Mexicana de Ciencias Agrícolas, (11), 2075–2082.
maize	109	cabrera-toledo_2015	825	zea_mays	COL-45	commercial_line	domNGE	NA	NA	controlled	NA	NA	NA	NA	NA	NA	47.1	NA	NA	150.13	cm	NA	NA	Cabrera-Toledo, J. M., Carballo-Carballo, A., & Aragón-Cuevas, F. (2015). Evaluación agronómica de maíces raza Zapalote chico en la región Istmeña de Oaxaca. Revista Mexicana de Ciencias Agrícolas, (11), 2075–2082.
maize	109	cabrera-toledo_2015	826	zea_mays	COL-51	commercial_line	domNGE	NA	NA	controlled	NA	NA	NA	NA	NA	NA	47.8	NA	NA	134.25	cm	NA	NA	Cabrera-Toledo, J. M., Carballo-Carballo, A., & Aragón-Cuevas, F. (2015). Evaluación agronómica de maíces raza Zapalote chico en la región Istmeña de Oaxaca. Revista Mexicana de Ciencias Agrícolas, (11), 2075–2082.
maize	109	cabrera-toledo_2015	827	zea_mays	COL-58	commercial_line	domNGE	NA	NA	controlled	NA	NA	NA	NA	NA	NA	48.3	NA	NA	130.38	cm	NA	NA	Cabrera-Toledo, J. M., Carballo-Carballo, A., & Aragón-Cuevas, F. (2015). Evaluación agronómica de maíces raza Zapalote chico en la región Istmeña de Oaxaca. Revista Mexicana de Ciencias Agrícolas, (11), 2075–2082.
maize	109	cabrera-toledo_2015	828	zea_mays	COL-62	commercial_line	domNGE	NA	NA	controlled	NA	NA	NA	NA	NA	NA	52	NA	NA	132.88	cm	NA	NA	Cabrera-Toledo, J. M., Carballo-Carballo, A., & Aragón-Cuevas, F. (2015). Evaluación agronómica de maíces raza Zapalote chico en la región Istmeña de Oaxaca. Revista Mexicana de Ciencias Agrícolas, (11), 2075–2082.
maize	109	cabrera-toledo_2015	829	zea_mays	COL-64	commercial_line	domNGE	NA	NA	controlled	NA	NA	NA	NA	NA	NA	48.6	NA	NA	127.55	cm	NA	NA	Cabrera-Toledo, J. M., Carballo-Carballo, A., & Aragón-Cuevas, F. (2015). Evaluación agronómica de maíces raza Zapalote chico en la región Istmeña de Oaxaca. Revista Mexicana de Ciencias Agrícolas, (11), 2075–2082.
maize	109	cabrera-toledo_2015	830	zea_mays	ZAP-MOR	commercial_line	domNGE	NA	NA	controlled	NA	NA	NA	NA	NA	NA	48.4	NA	NA	135.15	cm	NA	NA	Cabrera-Toledo, J. M., Carballo-Carballo, A., & Aragón-Cuevas, F. (2015). Evaluación agronómica de maíces raza Zapalote chico en la región Istmeña de Oaxaca. Revista Mexicana de Ciencias Agrícolas, (11), 2075–2082.
maize	110	tadeo-robledo_2015	831	zea_mays	C156xV54A	hybrid	domNGE	NA	NA	controlled	NA	NA	NA	NA	NA	NA	72.5	NA	NA	227	cm	NA	NA	Tadeo-Robledo, M., Espinosa-Calderón, A., Guzmán-Máximo, R., Turrent-Fernández, A., Zaragoza-Esparza, J., & Virgen-Vargas, J. (2015). Productividad de híbridos varietales de maíz de grano amarillo para valles altos de México. Agronomía Mesoamericana, 26(1), 65. http://doi.org/10.15517/am.v26i1.16921
maize	110	tadeo-robledo_2015	832	zea_mays	C156xV55A	hybrid	domNGE	NA	NA	controlled	NA	NA	NA	NA	NA	NA	73.5	NA	NA	228	cm	NA	NA	Tadeo-Robledo, M., Espinosa-Calderón, A., Guzmán-Máximo, R., Turrent-Fernández, A., Zaragoza-Esparza, J., & Virgen-Vargas, J. (2015). Productividad de híbridos varietales de maíz de grano amarillo para valles altos de México. Agronomía Mesoamericana, 26(1), 65. http://doi.org/10.15517/am.v26i1.16921
maize	110	tadeo-robledo_2015	833	zea_mays	C156xOU2C	hybrid	domNGE	NA	NA	controlled	NA	NA	NA	NA	NA	NA	73.5	NA	NA	234	cm	NA	NA	Tadeo-Robledo, M., Espinosa-Calderón, A., Guzmán-Máximo, R., Turrent-Fernández, A., Zaragoza-Esparza, J., & Virgen-Vargas, J. (2015). Productividad de híbridos varietales de maíz de grano amarillo para valles altos de México. Agronomía Mesoamericana, 26(1), 65. http://doi.org/10.15517/am.v26i1.16921
maize	110	tadeo-robledo_2015	834	zea_mays	V53A	commercial_line	domNGE	NA	NA	controlled	NA	NA	NA	NA	NA	NA	69.5	NA	NA	225	cm	NA	NA	Tadeo-Robledo, M., Espinosa-Calderón, A., Guzmán-Máximo, R., Turrent-Fernández, A., Zaragoza-Esparza, J., & Virgen-Vargas, J. (2015). Productividad de híbridos varietales de maíz de grano amarillo para valles altos de México. Agronomía Mesoamericana, 26(1), 65. http://doi.org/10.15517/am.v26i1.16921
maize	110	tadeo-robledo_2015	835	zea_mays	C155xV53A	hybrid	domNGE	NA	NA	controlled	NA	NA	NA	NA	NA	NA	73	NA	NA	223	cm	NA	NA	Tadeo-Robledo, M., Espinosa-Calderón, A., Guzmán-Máximo, R., Turrent-Fernández, A., Zaragoza-Esparza, J., & Virgen-Vargas, J. (2015). Productividad de híbridos varietales de maíz de grano amarillo para valles altos de México. Agronomía Mesoamericana, 26(1), 65. http://doi.org/10.15517/am.v26i1.16921
maize	110	tadeo-robledo_2015	836	zea_mays	C156xOPsD	hybrid	domNGE	NA	NA	controlled	NA	NA	NA	NA	NA	NA	71.5	NA	NA	229	cm	NA	NA	Tadeo-Robledo, M., Espinosa-Calderón, A., Guzmán-Máximo, R., Turrent-Fernández, A., Zaragoza-Esparza, J., & Virgen-Vargas, J. (2015). Productividad de híbridos varietales de maíz de grano amarillo para valles altos de México. Agronomía Mesoamericana, 26(1), 65. http://doi.org/10.15517/am.v26i1.16921
maize	110	tadeo-robledo_2015	837	zea_mays	V55A	commercial_line	domNGE	NA	NA	controlled	NA	NA	NA	NA	NA	NA	71.5	NA	NA	229	cm	NA	NA	Tadeo-Robledo, M., Espinosa-Calderón, A., Guzmán-Máximo, R., Turrent-Fernández, A., Zaragoza-Esparza, J., & Virgen-Vargas, J. (2015). Productividad de híbridos varietales de maíz de grano amarillo para valles altos de México. Agronomía Mesoamericana, 26(1), 65. http://doi.org/10.15517/am.v26i1.16921
maize	110	tadeo-robledo_2015	838	zea_mays	V54A	commercial_line	domNGE	NA	NA	controlled	NA	NA	NA	NA	NA	NA	72	NA	NA	213	cm	NA	NA	Tadeo-Robledo, M., Espinosa-Calderón, A., Guzmán-Máximo, R., Turrent-Fernández, A., Zaragoza-Esparza, J., & Virgen-Vargas, J. (2015). Productividad de híbridos varietales de maíz de grano amarillo para valles altos de México. Agronomía Mesoamericana, 26(1), 65. http://doi.org/10.15517/am.v26i1.16921
maize	110	tadeo-robledo_2015	839	zea_mays	C156xOU3C	hybrid	domNGE	NA	NA	controlled	NA	NA	NA	NA	NA	NA	73.5	NA	NA	223	cm	NA	NA	Tadeo-Robledo, M., Espinosa-Calderón, A., Guzmán-Máximo, R., Turrent-Fernández, A., Zaragoza-Esparza, J., & Virgen-Vargas, J. (2015). Productividad de híbridos varietales de maíz de grano amarillo para valles altos de México. Agronomía Mesoamericana, 26(1), 65. http://doi.org/10.15517/am.v26i1.16921
maize	110	tadeo-robledo_2015	840	zea_mays	C155xV54A	hybrid	domNGE	NA	NA	controlled	NA	NA	NA	NA	NA	NA	71.5	NA	NA	222	cm	NA	NA	Tadeo-Robledo, M., Espinosa-Calderón, A., Guzmán-Máximo, R., Turrent-Fernández, A., Zaragoza-Esparza, J., & Virgen-Vargas, J. (2015). Productividad de híbridos varietales de maíz de grano amarillo para valles altos de México. Agronomía Mesoamericana, 26(1), 65. http://doi.org/10.15517/am.v26i1.16921
maize	110	tadeo-robledo_2015	841	zea_mays	CS155	commercial_line	domNGE	NA	NA	controlled	NA	NA	NA	NA	NA	NA	76	NA	NA	214	cm	NA	NA	Tadeo-Robledo, M., Espinosa-Calderón, A., Guzmán-Máximo, R., Turrent-Fernández, A., Zaragoza-Esparza, J., & Virgen-Vargas, J. (2015). Productividad de híbridos varietales de maíz de grano amarillo para valles altos de México. Agronomía Mesoamericana, 26(1), 65. http://doi.org/10.15517/am.v26i1.16921
maize	110	tadeo-robledo_2015	842	zea_mays	oro_ultra_3C	commercial_line	domNGE	NA	NA	controlled	NA	NA	NA	NA	NA	NA	72.5	NA	NA	198	cm	NA	NA	Tadeo-Robledo, M., Espinosa-Calderón, A., Guzmán-Máximo, R., Turrent-Fernández, A., Zaragoza-Esparza, J., & Virgen-Vargas, J. (2015). Productividad de híbridos varietales de maíz de grano amarillo para valles altos de México. Agronomía Mesoamericana, 26(1), 65. http://doi.org/10.15517/am.v26i1.16921
maize	110	tadeo-robledo_2015	843	zea_mays	CS-156	commercial_line	domNGE	NA	NA	controlled	NA	NA	NA	NA	NA	NA	79.5	NA	NA	209	cm	NA	NA	Tadeo-Robledo, M., Espinosa-Calderón, A., Guzmán-Máximo, R., Turrent-Fernández, A., Zaragoza-Esparza, J., & Virgen-Vargas, J. (2015). Productividad de híbridos varietales de maíz de grano amarillo para valles altos de México. Agronomía Mesoamericana, 26(1), 65. http://doi.org/10.15517/am.v26i1.16921
maize	110	tadeo-robledo_2015	844	zea_mays	oro_plus_2D	commercial_line	domNGE	NA	NA	controlled	NA	NA	NA	NA	NA	NA	72.5	NA	NA	194	cm	NA	NA	Tadeo-Robledo, M., Espinosa-Calderón, A., Guzmán-Máximo, R., Turrent-Fernández, A., Zaragoza-Esparza, J., & Virgen-Vargas, J. (2015). Productividad de híbridos varietales de maíz de grano amarillo para valles altos de México. Agronomía Mesoamericana, 26(1), 65. http://doi.org/10.15517/am.v26i1.16921
maize	110	tadeo-robledo_2015	845	zea_mays	oro_ultra_2C	commercial_line	domNGE	NA	NA	controlled	NA	NA	NA	NA	NA	NA	75.5	NA	NA	202	cm	NA	NA	Tadeo-Robledo, M., Espinosa-Calderón, A., Guzmán-Máximo, R., Turrent-Fernández, A., Zaragoza-Esparza, J., & Virgen-Vargas, J. (2015). Productividad de híbridos varietales de maíz de grano amarillo para valles altos de México. Agronomía Mesoamericana, 26(1), 65. http://doi.org/10.15517/am.v26i1.16921
maize	111	almeida_2015	846	zea_mays_sub_spp	T2484	teocintle	wild	NA	NA	controlled	NA	NA	NA	NA	NA	NA	133	NA	NA	260	cm	NA	NA	De Almeida Silva, N. C., Vidal, R., Costa, F. M., Vaio, M., & Ogliari, J. B. (2015). Presence of Zea luxurians (durieu and ascherson) bird in Southern Brazil: Implications for the conservation of wild relatives of maize. PLoS ONE, 10(10), 1–16. http://doi.org/10.1371/journal.pone.0139034
maize	111	almeida_2015	847	zea_mays_sub_spp	T2335	teocintle	wild	NA	NA	controlled	NA	NA	NA	NA	NA	NA	158	NA	NA	250	cm	NA	NA	De Almeida Silva, N. C., Vidal, R., Costa, F. M., Vaio, M., & Ogliari, J. B. (2015). Presence of Zea luxurians (durieu and ascherson) bird in Southern Brazil: Implications for the conservation of wild relatives of maize. PLoS ONE, 10(10), 1–16. http://doi.org/10.1371/journal.pone.0139034
maize	111	almeida_2015	848	zea_mays_sub_spp	T824	teocintle	wild	NA	NA	controlled	NA	NA	NA	NA	NA	NA	129	NA	NA	270	cm	NA	NA	De Almeida Silva, N. C., Vidal, R., Costa, F. M., Vaio, M., & Ogliari, J. B. (2015). Presence of Zea luxurians (durieu and ascherson) bird in Southern Brazil: Implications for the conservation of wild relatives of maize. PLoS ONE, 10(10), 1–16. http://doi.org/10.1371/journal.pone.0139034
maize	111	almeida_2015	849	zea_mays_sub_spp	T51	teocintle	wild	NA	NA	controlled	NA	NA	NA	NA	NA	NA	149	NA	NA	270	cm	NA	NA	De Almeida Silva, N. C., Vidal, R., Costa, F. M., Vaio, M., & Ogliari, J. B. (2015). Presence of Zea luxurians (durieu and ascherson) bird in Southern Brazil: Implications for the conservation of wild relatives of maize. PLoS ONE, 10(10), 1–16. http://doi.org/10.1371/journal.pone.0139034
maize	111	almeida_2015	850	zea_mays_sub_spp	T2021	teocintle	wild	NA	NA	controlled	NA	NA	NA	NA	NA	NA	171	NA	NA	290	cm	NA	NA	De Almeida Silva, N. C., Vidal, R., Costa, F. M., Vaio, M., & Ogliari, J. B. (2015). Presence of Zea luxurians (durieu and ascherson) bird in Southern Brazil: Implications for the conservation of wild relatives of maize. PLoS ONE, 10(10), 1–16. http://doi.org/10.1371/journal.pone.0139034
maize	112	Traore_2000	851	zea_mays	CIBA	commercial_line	domGE	cry	2	controlled	411	total_number	NA	NA	NA	NA	NA	NA	NA	NA	NA	NA	NA	Traore, S. B., Carlson, R. E., Pilcher, C. D., & Rice, M. E. (2000). Bt and non-Bt maize growth and development as affected by temperature and drought stress. Agronomy Journal, 92(5), 1027–1035. http://doi.org/10.2134/agronj2000.9251027x
maize	112	Traore_2000	852	zea_mays	CIBA	hybrid	domNGE	NA	NA	controlled	435	total_number	NA	NA	NA	NA	NA	NA	NA	NA	NA	NA	NA	Traore, S. B., Carlson, R. E., Pilcher, C. D., & Rice, M. E. (2000). Bt and non-Bt maize growth and development as affected by temperature and drought stress. Agronomy Journal, 92(5), 1027–1035. http://doi.org/10.2134/agronj2000.9251027x
maize	112	Traore_2000	853	zea_mays	NK	commercial_line	domGE	cry	2	controlled	472	total_number	NA	NA	NA	NA	NA	NA	NA	NA	NA	NA	NA	Traore, S. B., Carlson, R. E., Pilcher, C. D., & Rice, M. E. (2000). Bt and non-Bt maize growth and development as affected by temperature and drought stress. Agronomy Journal, 92(5), 1027–1035. http://doi.org/10.2134/agronj2000.9251027x
maize	112	Traore_2000	854	zea_mays	NK	hybrid	domNGE	NA	NA	controlled	441	total_number	NA	NA	NA	NA	NA	NA	NA	NA	NA	NA	NA	Traore, S. B., Carlson, R. E., Pilcher, C. D., & Rice, M. E. (2000). Bt and non-Bt maize growth and development as affected by temperature and drought stress. Agronomy Journal, 92(5), 1027–1035. http://doi.org/10.2134/agronj2000.9251027x
maize	112	Traore_2000	855	zea_mays	CIBA	commercial_line	domGE	cry	2	controlled	439	total_number	NA	NA	NA	NA	NA	NA	NA	NA	NA	NA	NA	Traore, S. B., Carlson, R. E., Pilcher, C. D., & Rice, M. E. (2000). Bt and non-Bt maize growth and development as affected by temperature and drought stress. Agronomy Journal, 92(5), 1027–1035. http://doi.org/10.2134/agronj2000.9251027x
maize	112	Traore_2000	856	zea_mays	CIBA	hybrid	domNGE	NA	NA	controlled	415	total_number	NA	NA	NA	NA	NA	NA	NA	NA	NA	NA	NA	Traore, S. B., Carlson, R. E., Pilcher, C. D., & Rice, M. E. (2000). Bt and non-Bt maize growth and development as affected by temperature and drought stress. Agronomy Journal, 92(5), 1027–1035. http://doi.org/10.2134/agronj2000.9251027x
maize	112	Traore_2000	857	zea_mays	NK	commercial_line	domGE	cry	2	controlled	466	total_number	NA	NA	NA	NA	NA	NA	NA	NA	NA	NA	NA	Traore, S. B., Carlson, R. E., Pilcher, C. D., & Rice, M. E. (2000). Bt and non-Bt maize growth and development as affected by temperature and drought stress. Agronomy Journal, 92(5), 1027–1035. http://doi.org/10.2134/agronj2000.9251027x
maize	112	Traore_2000	858	zea_mays	NK	hybrid	domNGE	NA	NA	controlled	418	total_number	NA	NA	NA	NA	NA	NA	NA	NA	NA	NA	NA	Traore, S. B., Carlson, R. E., Pilcher, C. D., & Rice, M. E. (2000). Bt and non-Bt maize growth and development as affected by temperature and drought stress. Agronomy Journal, 92(5), 1027–1035. http://doi.org/10.2134/agronj2000.9251027x
maize	113	Chen_2012	859	zea_mays	Tx205	commercial_line	domNGE	NA	NA	controlled	NA	NA	NA	NA	NA	NA	NA	NA	NA	147	cm	NA	NA	Chen, J., Xu, W., Velten, J., Xin, Z., & Stout, J. (2012). Characterization of maize inbred lines for drought and heat tolerance. Journal of Soil and Water Conservation, 67(5), 354–364. http://doi.org/10.2489/jswc.67.5.354
maize	113	Chen_2012	860	zea_mays	B76	commercial_line	domNGE	NA	NA	controlled	NA	NA	NA	NA	99	%	NA	NA	NA	164	cm	NA	NA	Chen, J., Xu, W., Velten, J., Xin, Z., & Stout, J. (2012). Characterization of maize inbred lines for drought and heat tolerance. Journal of Soil and Water Conservation, 67(5), 354–364. http://doi.org/10.2489/jswc.67.5.354
maize	113	Chen_2012	861	zea_mays	B73	commercial_line	domNGE	NA	NA	controlled	NA	NA	NA	NA	NA	NA	NA	NA	NA	149	cm	NA	NA	Chen, J., Xu, W., Velten, J., Xin, Z., & Stout, J. (2012). Characterization of maize inbred lines for drought and heat tolerance. Journal of Soil and Water Conservation, 67(5), 354–364. http://doi.org/10.2489/jswc.67.5.354
maize	113	Chen_2012	862	zea_mays	B106	commercial_line	domNGE	NA	NA	controlled	NA	NA	NA	NA	NA	NA	NA	NA	NA	139	cm	NA	NA	Chen, J., Xu, W., Velten, J., Xin, Z., & Stout, J. (2012). Characterization of maize inbred lines for drought and heat tolerance. Journal of Soil and Water Conservation, 67(5), 354–364. http://doi.org/10.2489/jswc.67.5.354
maize	113	Chen_2012	863	zea_mays	NC350	commercial_line	domNGE	NA	NA	controlled	NA	NA	NA	NA	NA	NA	NA	NA	NA	139	cm	NA	NA	Chen, J., Xu, W., Velten, J., Xin, Z., & Stout, J. (2012). Characterization of maize inbred lines for drought and heat tolerance. Journal of Soil and Water Conservation, 67(5), 354–364. http://doi.org/10.2489/jswc.67.5.354
maize	113	Chen_2012	864	zea_mays	Tx205	commercial_line	domNGE	NA	NA	controlled	NA	NA	NA	NA	NA	NA	NA	NA	NA	155	cm	NA	NA	Chen, J., Xu, W., Velten, J., Xin, Z., & Stout, J. (2012). Characterization of maize inbred lines for drought and heat tolerance. Journal of Soil and Water Conservation, 67(5), 354–364. http://doi.org/10.2489/jswc.67.5.354
maize	113	Chen_2012	865	zea_mays	B76	commercial_line	domNGE	NA	NA	controlled	NA	NA	NA	NA	NA	NA	NA	NA	NA	175	cm	NA	NA	Chen, J., Xu, W., Velten, J., Xin, Z., & Stout, J. (2012). Characterization of maize inbred lines for drought and heat tolerance. Journal of Soil and Water Conservation, 67(5), 354–364. http://doi.org/10.2489/jswc.67.5.354
maize	113	Chen_2012	866	zea_mays	B73	commercial_line	domNGE	NA	NA	controlled	NA	NA	NA	NA	NA	NA	NA	NA	NA	190	cm	NA	NA	Chen, J., Xu, W., Velten, J., Xin, Z., & Stout, J. (2012). Characterization of maize inbred lines for drought and heat tolerance. Journal of Soil and Water Conservation, 67(5), 354–364. http://doi.org/10.2489/jswc.67.5.354
maize	113	Chen_2012	867	zea_mays	B106	commercial_line	domNGE	NA	NA	controlled	NA	NA	NA	NA	NA	NA	NA	NA	NA	160	cm	NA	NA	Chen, J., Xu, W., Velten, J., Xin, Z., & Stout, J. (2012). Characterization of maize inbred lines for drought and heat tolerance. Journal of Soil and Water Conservation, 67(5), 354–364. http://doi.org/10.2489/jswc.67.5.354
maize	113	Chen_2012	868	zea_mays	NC350	commercial_line	domNGE	NA	NA	controlled	NA	NA	NA	NA	90	%	NA	NA	NA	164	cm	NA	NA	Chen, J., Xu, W., Velten, J., Xin, Z., & Stout, J. (2012). Characterization of maize inbred lines for drought and heat tolerance. Journal of Soil and Water Conservation, 67(5), 354–364. http://doi.org/10.2489/jswc.67.5.354
maize	114	Niazi_2015	869	zea_mays	NA	commercial_line	domNGE	NA	NA	controlled	NA	NA	NA	NA	NA	NA	56.29	NA	NA	178.5	cm	NA	NA	Niazi, I. A. K., Rauf, S., Teixeira Da Silva, J. A., & Munir, H. (2015). Comparison of teosinte (Zea mexicana L.) and inter-subspecific hybrids (Zea mays L.??Zea mexicana) for high forage yield under two sowing regimes. Crop and Pasture Science, 66(1), 49–61. http://doi.org/10.1071/CP14155
maize	114	Niazi_2015	870	zea_mays_sub_mexicana	NA	teocintle	wild	NA	NA	controlled	NA	NA	NA	NA	NA	NA	NA	NA	NA	58.48	cm	NA	NA	Niazi, I. A. K., Rauf, S., Teixeira Da Silva, J. A., & Munir, H. (2015). Comparison of teosinte (Zea mexicana L.) and inter-subspecific hybrids (Zea mays L.??Zea mexicana) for high forage yield under two sowing regimes. Crop and Pasture Science, 66(1), 49–61. http://doi.org/10.1071/CP14155
maize	114	Niazi_2015	871	zea_mays_sub_spp	NA	hybrid	domNGE	NA	NA	controlled	NA	NA	NA	NA	NA	NA	67.36	NA	NA	189.94	cm	NA	NA	Niazi, I. A. K., Rauf, S., Teixeira Da Silva, J. A., & Munir, H. (2015). Comparison of teosinte (Zea mexicana L.) and inter-subspecific hybrids (Zea mays L.??Zea mexicana) for high forage yield under two sowing regimes. Crop and Pasture Science, 66(1), 49–61. http://doi.org/10.1071/CP14155
maize	114	Niazi_2015	872	zea_mays	NA	commercial_line	domNGE	NA	NA	controlled	NA	NA	NA	NA	NA	NA	49.58	NA	NA	163	cm	NA	NA	Niazi, I. A. K., Rauf, S., Teixeira Da Silva, J. A., & Munir, H. (2015). Comparison of teosinte (Zea mexicana L.) and inter-subspecific hybrids (Zea mays L.??Zea mexicana) for high forage yield under two sowing regimes. Crop and Pasture Science, 66(1), 49–61. http://doi.org/10.1071/CP14155
maize	114	Niazi_2015	873	zea_mays_sub_mexicana	NA	teocintle	wild	NA	NA	controlled	NA	NA	NA	NA	NA	NA	NA	NA	NA	72	cm	NA	NA	Niazi, I. A. K., Rauf, S., Teixeira Da Silva, J. A., & Munir, H. (2015). Comparison of teosinte (Zea mexicana L.) and inter-subspecific hybrids (Zea mays L.??Zea mexicana) for high forage yield under two sowing regimes. Crop and Pasture Science, 66(1), 49–61. http://doi.org/10.1071/CP14155
maize	114	Niazi_2015	874	zea_mays_sub_spp	NA	hybrid	domNGE	NA	NA	controlled	NA	NA	NA	NA	NA	NA	59.13	NA	NA	205.57	cm	NA	NA	Niazi, I. A. K., Rauf, S., Teixeira Da Silva, J. A., & Munir, H. (2015). Comparison of teosinte (Zea mexicana L.) and inter-subspecific hybrids (Zea mays L.??Zea mexicana) for high forage yield under two sowing regimes. Crop and Pasture Science, 66(1), 49–61. http://doi.org/10.1071/CP14155
maize	115	Lopez_2011	875	zea_mays	NA	teocintle	wild	NA	NA	controlled	NA	NA	NA	NA	50.9	%	NA	NA	NA	NA	NA	NA	NA	López, A. N. A., González, J. de J. S., Corral, J. A. R., Larios, L. de la C., Santacruz-Ruvalcaba, F., Hernández, C. V. S., & Holland, J. B. (2011). Seed dormancy in Mexican teosinte. Crop Science, 51(5), 2056–2066. http://doi.org/10.2135/cropsci2010.09.0538
maize	115	Lopez_2011	876	zea_mays	NA	teocintle	wild	NA	NA	controlled	NA	NA	NA	NA	77.8	%	NA	NA	NA	NA	NA	NA	NA	López, A. N. A., González, J. de J. S., Corral, J. A. R., Larios, L. de la C., Santacruz-Ruvalcaba, F., Hernández, C. V. S., & Holland, J. B. (2011). Seed dormancy in Mexican teosinte. Crop Science, 51(5), 2056–2066. http://doi.org/10.2135/cropsci2010.09.0538
maize	115	Lopez_2011	877	zea_mays	NA	teocintle	wild	NA	NA	controlled	NA	NA	NA	NA	64.9	%	NA	NA	NA	NA	NA	NA	NA	López, A. N. A., González, J. de J. S., Corral, J. A. R., Larios, L. de la C., Santacruz-Ruvalcaba, F., Hernández, C. V. S., & Holland, J. B. (2011). Seed dormancy in Mexican teosinte. Crop Science, 51(5), 2056–2066. http://doi.org/10.2135/cropsci2010.09.0538
maize	115	Lopez_2011	878	zea_mays	NA	teocintle	wild	NA	NA	controlled	NA	NA	NA	NA	8.1	%	NA	NA	NA	NA	NA	NA	NA	López, A. N. A., González, J. de J. S., Corral, J. A. R., Larios, L. de la C., Santacruz-Ruvalcaba, F., Hernández, C. V. S., & Holland, J. B. (2011). Seed dormancy in Mexican teosinte. Crop Science, 51(5), 2056–2066. http://doi.org/10.2135/cropsci2010.09.0538
maize	115	Lopez_2011	879	zea_luxurians	NA	teocintle	wild	NA	NA	controlled	NA	NA	NA	NA	3	%	NA	NA	NA	NA	NA	NA	NA	López, A. N. A., González, J. de J. S., Corral, J. A. R., Larios, L. de la C., Santacruz-Ruvalcaba, F., Hernández, C. V. S., & Holland, J. B. (2011). Seed dormancy in Mexican teosinte. Crop Science, 51(5), 2056–2066. http://doi.org/10.2135/cropsci2010.09.0538
maize	115	Lopez_2011	880	zea_perenis	NA	teocintle	wild	NA	NA	controlled	NA	NA	NA	NA	78.9	%	NA	NA	NA	NA	NA	NA	NA	López, A. N. A., González, J. de J. S., Corral, J. A. R., Larios, L. de la C., Santacruz-Ruvalcaba, F., Hernández, C. V. S., & Holland, J. B. (2011). Seed dormancy in Mexican teosinte. Crop Science, 51(5), 2056–2066. http://doi.org/10.2135/cropsci2010.09.0538
maize	115	Lopez_2011	881	zea_mays_sup_diploperenis	NA	teocintle	wild	NA	NA	controlled	NA	NA	NA	NA	86.8	%	NA	NA	NA	NA	NA	NA	NA	López, A. N. A., González, J. de J. S., Corral, J. A. R., Larios, L. de la C., Santacruz-Ruvalcaba, F., Hernández, C. V. S., & Holland, J. B. (2011). Seed dormancy in Mexican teosinte. Crop Science, 51(5), 2056–2066. http://doi.org/10.2135/cropsci2010.09.0538
maize	115	Lopez_2011	882	zea_mays_sub_parviglumis	NA	teocintle	wild	NA	NA	controlled	NA	NA	NA	NA	94.2	%	NA	NA	NA	NA	NA	NA	NA	López, A. N. A., González, J. de J. S., Corral, J. A. R., Larios, L. de la C., Santacruz-Ruvalcaba, F., Hernández, C. V. S., & Holland, J. B. (2011). Seed dormancy in Mexican teosinte. Crop Science, 51(5), 2056–2066. http://doi.org/10.2135/cropsci2010.09.0538
maize	115	Lopez_2011	883	zea_mays_sub_parviglumis	NA	teocintle	wild	NA	NA	controlled	NA	NA	NA	NA	97.8	%	NA	NA	NA	NA	NA	NA	NA	López, A. N. A., González, J. de J. S., Corral, J. A. R., Larios, L. de la C., Santacruz-Ruvalcaba, F., Hernández, C. V. S., & Holland, J. B. (2011). Seed dormancy in Mexican teosinte. Crop Science, 51(5), 2056–2066. http://doi.org/10.2135/cropsci2010.09.0538
maize	115	Lopez_2011	884	zea_mays_sub_parviglumis	NA	teocintle	wild	NA	NA	controlled	NA	NA	NA	NA	96	%	NA	NA	NA	NA	NA	NA	NA	López, A. N. A., González, J. de J. S., Corral, J. A. R., Larios, L. de la C., Santacruz-Ruvalcaba, F., Hernández, C. V. S., & Holland, J. B. (2011). Seed dormancy in Mexican teosinte. Crop Science, 51(5), 2056–2066. http://doi.org/10.2135/cropsci2010.09.0538
maize	115	Lopez_2011	885	zea_mays_sub_parviglumis	NA	teocintle	wild	NA	NA	controlled	NA	NA	NA	NA	83.1	%	NA	NA	NA	NA	NA	NA	NA	López, A. N. A., González, J. de J. S., Corral, J. A. R., Larios, L. de la C., Santacruz-Ruvalcaba, F., Hernández, C. V. S., & Holland, J. B. (2011). Seed dormancy in Mexican teosinte. Crop Science, 51(5), 2056–2066. http://doi.org/10.2135/cropsci2010.09.0538
maize	115	Lopez_2011	886	zea_mays_sub_parviglumis	NA	teocintle	wild	NA	NA	controlled	NA	NA	NA	NA	83	%	NA	NA	NA	NA	NA	NA	NA	López, A. N. A., González, J. de J. S., Corral, J. A. R., Larios, L. de la C., Santacruz-Ruvalcaba, F., Hernández, C. V. S., & Holland, J. B. (2011). Seed dormancy in Mexican teosinte. Crop Science, 51(5), 2056–2066. http://doi.org/10.2135/cropsci2010.09.0538
maize	115	Lopez_2011	887	zea_mays_sub_parviglumis	NA	teocintle	wild	NA	NA	controlled	NA	NA	NA	NA	59.4	%	NA	NA	NA	NA	NA	NA	NA	López, A. N. A., González, J. de J. S., Corral, J. A. R., Larios, L. de la C., Santacruz-Ruvalcaba, F., Hernández, C. V. S., & Holland, J. B. (2011). Seed dormancy in Mexican teosinte. Crop Science, 51(5), 2056–2066. http://doi.org/10.2135/cropsci2010.09.0538
maize	115	Lopez_2011	888	zea_mays_sub_parviglumis	NA	teocintle	wild	NA	NA	controlled	NA	NA	NA	NA	97.5	%	NA	NA	NA	NA	NA	NA	NA	López, A. N. A., González, J. de J. S., Corral, J. A. R., Larios, L. de la C., Santacruz-Ruvalcaba, F., Hernández, C. V. S., & Holland, J. B. (2011). Seed dormancy in Mexican teosinte. Crop Science, 51(5), 2056–2066. http://doi.org/10.2135/cropsci2010.09.0538
maize	115	Lopez_2011	889	zea_mays_sub_parviglumis	NA	teocintle	wild	NA	NA	controlled	NA	NA	NA	NA	52.2	%	NA	NA	NA	NA	NA	NA	NA	López, A. N. A., González, J. de J. S., Corral, J. A. R., Larios, L. de la C., Santacruz-Ruvalcaba, F., Hernández, C. V. S., & Holland, J. B. (2011). Seed dormancy in Mexican teosinte. Crop Science, 51(5), 2056–2066. http://doi.org/10.2135/cropsci2010.09.0538
maize	115	Lopez_2011	890	zea_mays_sub_parviglumis	NA	teocintle	wild	NA	NA	controlled	NA	NA	NA	NA	54	%	NA	NA	NA	NA	NA	NA	NA	López, A. N. A., González, J. de J. S., Corral, J. A. R., Larios, L. de la C., Santacruz-Ruvalcaba, F., Hernández, C. V. S., & Holland, J. B. (2011). Seed dormancy in Mexican teosinte. Crop Science, 51(5), 2056–2066. http://doi.org/10.2135/cropsci2010.09.0538
maize	115	Lopez_2011	891	zea_mays_sub_parviglumis	NA	teocintle	wild	NA	NA	controlled	NA	NA	NA	NA	78.3	%	NA	NA	NA	NA	NA	NA	NA	López, A. N. A., González, J. de J. S., Corral, J. A. R., Larios, L. de la C., Santacruz-Ruvalcaba, F., Hernández, C. V. S., & Holland, J. B. (2011). Seed dormancy in Mexican teosinte. Crop Science, 51(5), 2056–2066. http://doi.org/10.2135/cropsci2010.09.0538
maize	115	Lopez_2011	892	zea_mays_sub_parviglumis	NA	teocintle	wild	NA	NA	controlled	NA	NA	NA	NA	100	%	NA	NA	NA	NA	NA	NA	NA	López, A. N. A., González, J. de J. S., Corral, J. A. R., Larios, L. de la C., Santacruz-Ruvalcaba, F., Hernández, C. V. S., & Holland, J. B. (2011). Seed dormancy in Mexican teosinte. Crop Science, 51(5), 2056–2066. http://doi.org/10.2135/cropsci2010.09.0538
maize	115	Lopez_2011	893	zea_mays_sub_parviglumis	NA	teocintle	wild	NA	NA	controlled	NA	NA	NA	NA	98.8	%	NA	NA	NA	NA	NA	NA	NA	López, A. N. A., González, J. de J. S., Corral, J. A. R., Larios, L. de la C., Santacruz-Ruvalcaba, F., Hernández, C. V. S., & Holland, J. B. (2011). Seed dormancy in Mexican teosinte. Crop Science, 51(5), 2056–2066. http://doi.org/10.2135/cropsci2010.09.0538
maize	115	Lopez_2011	894	zea_mays_sub_parviglumis	NA	teocintle	wild	NA	NA	controlled	NA	NA	NA	NA	100	%	NA	NA	NA	NA	NA	NA	NA	López, A. N. A., González, J. de J. S., Corral, J. A. R., Larios, L. de la C., Santacruz-Ruvalcaba, F., Hernández, C. V. S., & Holland, J. B. (2011). Seed dormancy in Mexican teosinte. Crop Science, 51(5), 2056–2066. http://doi.org/10.2135/cropsci2010.09.0538
maize	115	Lopez_2011	895	zea_mays_sub_mexicana	NA	teocintle	wild	NA	NA	controlled	NA	NA	NA	NA	72.5	%	NA	NA	NA	NA	NA	NA	NA	López, A. N. A., González, J. de J. S., Corral, J. A. R., Larios, L. de la C., Santacruz-Ruvalcaba, F., Hernández, C. V. S., & Holland, J. B. (2011). Seed dormancy in Mexican teosinte. Crop Science, 51(5), 2056–2066. http://doi.org/10.2135/cropsci2010.09.0538
maize	115	Lopez_2011	896	zea_mays_sub_mexicana	NA	teocintle	wild	NA	NA	controlled	NA	NA	NA	NA	69.8	%	NA	NA	NA	NA	NA	NA	NA	López, A. N. A., González, J. de J. S., Corral, J. A. R., Larios, L. de la C., Santacruz-Ruvalcaba, F., Hernández, C. V. S., & Holland, J. B. (2011). Seed dormancy in Mexican teosinte. Crop Science, 51(5), 2056–2066. http://doi.org/10.2135/cropsci2010.09.0538
maize	115	Lopez_2011	897	zea_mays_sub_mexicana	NA	teocintle	wild	NA	NA	controlled	NA	NA	NA	NA	74.7	%	NA	NA	NA	NA	NA	NA	NA	López, A. N. A., González, J. de J. S., Corral, J. A. R., Larios, L. de la C., Santacruz-Ruvalcaba, F., Hernández, C. V. S., & Holland, J. B. (2011). Seed dormancy in Mexican teosinte. Crop Science, 51(5), 2056–2066. http://doi.org/10.2135/cropsci2010.09.0538
maize	115	Lopez_2011	898	zea_mays_sub_mexicana	NA	teocintle	wild	NA	NA	controlled	NA	NA	NA	NA	100	%	NA	NA	NA	NA	NA	NA	NA	López, A. N. A., González, J. de J. S., Corral, J. A. R., Larios, L. de la C., Santacruz-Ruvalcaba, F., Hernández, C. V. S., & Holland, J. B. (2011). Seed dormancy in Mexican teosinte. Crop Science, 51(5), 2056–2066. http://doi.org/10.2135/cropsci2010.09.0538
maize	115	Lopez_2011	899	zea_mays_sub_mexicana	NA	teocintle	wild	NA	NA	controlled	NA	NA	NA	NA	91.7	%	NA	NA	NA	NA	NA	NA	NA	López, A. N. A., González, J. de J. S., Corral, J. A. R., Larios, L. de la C., Santacruz-Ruvalcaba, F., Hernández, C. V. S., & Holland, J. B. (2011). Seed dormancy in Mexican teosinte. Crop Science, 51(5), 2056–2066. http://doi.org/10.2135/cropsci2010.09.0538
maize	115	Lopez_2011	900	zea_mays_sub_mexicana	NA	teocintle	wild	NA	NA	controlled	NA	NA	NA	NA	67.3	%	NA	NA	NA	NA	NA	NA	NA	López, A. N. A., González, J. de J. S., Corral, J. A. R., Larios, L. de la C., Santacruz-Ruvalcaba, F., Hernández, C. V. S., & Holland, J. B. (2011). Seed dormancy in Mexican teosinte. Crop Science, 51(5), 2056–2066. http://doi.org/10.2135/cropsci2010.09.0538
maize	115	Lopez_2011	901	zea_mays_sub_mexicana	NA	teocintle	wild	NA	NA	controlled	NA	NA	NA	NA	65	%	NA	NA	NA	NA	NA	NA	NA	López, A. N. A., González, J. de J. S., Corral, J. A. R., Larios, L. de la C., Santacruz-Ruvalcaba, F., Hernández, C. V. S., & Holland, J. B. (2011). Seed dormancy in Mexican teosinte. Crop Science, 51(5), 2056–2066. http://doi.org/10.2135/cropsci2010.09.0538
maize	115	Lopez_2011	902	zea_mays_sup_diploperenis	NA	teocintle	wild	NA	NA	controlled	NA	NA	NA	NA	93.8	%	NA	NA	NA	NA	NA	NA	NA	López, A. N. A., González, J. de J. S., Corral, J. A. R., Larios, L. de la C., Santacruz-Ruvalcaba, F., Hernández, C. V. S., & Holland, J. B. (2011). Seed dormancy in Mexican teosinte. Crop Science, 51(5), 2056–2066. http://doi.org/10.2135/cropsci2010.09.0538
maize	115	Lopez_2011	903	zea_mays_sup_diploperenis	NA	teocintle	wild	NA	NA	controlled	NA	NA	NA	NA	96.1	%	NA	NA	NA	NA	NA	NA	NA	López, A. N. A., González, J. de J. S., Corral, J. A. R., Larios, L. de la C., Santacruz-Ruvalcaba, F., Hernández, C. V. S., & Holland, J. B. (2011). Seed dormancy in Mexican teosinte. Crop Science, 51(5), 2056–2066. http://doi.org/10.2135/cropsci2010.09.0538
maize	115	Lopez_2011	904	zea_luxurians	NA	teocintle	wild	NA	NA	controlled	NA	NA	NA	NA	8	%	NA	NA	NA	NA	NA	NA	NA	López, A. N. A., González, J. de J. S., Corral, J. A. R., Larios, L. de la C., Santacruz-Ruvalcaba, F., Hernández, C. V. S., & Holland, J. B. (2011). Seed dormancy in Mexican teosinte. Crop Science, 51(5), 2056–2066. http://doi.org/10.2135/cropsci2010.09.0538
maize	115	Lopez_2011	905	zea_perenis	NA	teocintle	wild	NA	NA	controlled	NA	NA	NA	NA	87.5	%	NA	NA	NA	NA	NA	NA	NA	López, A. N. A., González, J. de J. S., Corral, J. A. R., Larios, L. de la C., Santacruz-Ruvalcaba, F., Hernández, C. V. S., & Holland, J. B. (2011). Seed dormancy in Mexican teosinte. Crop Science, 51(5), 2056–2066. http://doi.org/10.2135/cropsci2010.09.0538
maize	116	Lindsey_2016	906	zea_mays	PO210	hybrid	domGE	BADH	5	controlled	622	total_number	NA	NA	NA	NA	NA	NA	NA	NA	NA	NA	NA	Lindsey, A. J., & Thomison, P. R. (2016). Drought-tolerant corn hybrid and relative maturity yield response to plant population and planting date. Agronomy Journal, 108(1), 229–242. http://doi.org/10.2134/agronj2015.0200
maize	116	Lindsey_2016	907	zea_mays	PO210	hybrid	domGE	BADH	5	controlled	514	total_number	NA	NA	NA	NA	NA	NA	NA	NA	NA	NA	NA	Lindsey, A. J., & Thomison, P. R. (2016). Drought-tolerant corn hybrid and relative maturity yield response to plant population and planting date. Agronomy Journal, 108(1), 229–242. http://doi.org/10.2134/agronj2015.0200
maize	116	Lindsey_2016	908	zea_mays	PI352	hybrid	domGE	BADH	5	controlled	595	total_number	NA	NA	NA	NA	NA	NA	NA	NA	NA	NA	NA	Lindsey, A. J., & Thomison, P. R. (2016). Drought-tolerant corn hybrid and relative maturity yield response to plant population and planting date. Agronomy Journal, 108(1), 229–242. http://doi.org/10.2134/agronj2015.0200
maize	116	Lindsey_2016	909	zea_mays	PI352	hybrid	domGE	BADH	5	controlled	449	total_number	NA	NA	NA	NA	NA	NA	NA	NA	NA	NA	NA	Lindsey, A. J., & Thomison, P. R. (2016). Drought-tolerant corn hybrid and relative maturity yield response to plant population and planting date. Agronomy Journal, 108(1), 229–242. http://doi.org/10.2134/agronj2015.0200
maize	116	Lindsey_2016	910	zea_mays	PO448	hybrid	domNGE	NA	NA	controlled	630	total_number	NA	NA	NA	NA	NA	NA	NA	NA	NA	NA	NA	Lindsey, A. J., & Thomison, P. R. (2016). Drought-tolerant corn hybrid and relative maturity yield response to plant population and planting date. Agronomy Journal, 108(1), 229–242. http://doi.org/10.2134/agronj2015.0200
maize	116	Lindsey_2016	911	zea_mays	PI184	hybrid	domNGE	NA	NA	controlled	499	total_number	NA	NA	NA	NA	NA	NA	NA	NA	NA	NA	NA	Lindsey, A. J., & Thomison, P. R. (2016). Drought-tolerant corn hybrid and relative maturity yield response to plant population and planting date. Agronomy Journal, 108(1), 229–242. http://doi.org/10.2134/agronj2015.0200
maize	116	Lindsey_2016	912	zea_mays	PO448	hybrid	domNGE	NA	NA	controlled	581	total_number	NA	NA	NA	NA	NA	NA	NA	NA	NA	NA	NA	Lindsey, A. J., & Thomison, P. R. (2016). Drought-tolerant corn hybrid and relative maturity yield response to plant population and planting date. Agronomy Journal, 108(1), 229–242. http://doi.org/10.2134/agronj2015.0200
maize	116	Lindsey_2016	913	zea_mays	PI184	hybrid	domNGE	NA	NA	controlled	425	total_number	NA	NA	NA	NA	NA	NA	NA	NA	NA	NA	NA	Lindsey, A. J., & Thomison, P. R. (2016). Drought-tolerant corn hybrid and relative maturity yield response to plant population and planting date. Agronomy Journal, 108(1), 229–242. http://doi.org/10.2134/agronj2015.0200
maize	117	Yang_2016	914	zea_mays	Zheng_58	commercial_line	domGE	BADH	5	controlled	NA	NA	NA	NA	NA	NA	NA	NA	NA	46.67	cm	NA	NA	Yang, L., Liu, X., Guo, X., Sun, Y., & Hao, Y. (2016). Comparison between transgenic maize with exotic betaine aldehyde dehydrogenase (BADH) gene and its untransformed counterpart. Maydica, 61(2).
maize	117	Yang_2016	915	zea_mays	Zheng_58	commercial_line	domNGE	NA	NA	controlled	NA	NA	NA	NA	NA	NA	NA	NA	NA	50.02	cm	NA	NA	Yang, L., Liu, X., Guo, X., Sun, Y., & Hao, Y. (2016). Comparison between transgenic maize with exotic betaine aldehyde dehydrogenase (BADH) gene and its untransformed counterpart. Maydica, 61(2).
maize	118	Magg_2011	916	zea_mays	CesarBt	hybrid	domGE	cry	2	controlled	NA	NA	NA	NA	NA	NA	NA	NA	NA	201	cm	NA	NA	Magg, T., Melchinger, A. E., Klein, D., & Bohn, M. (2001). Comparison of Bt maize hybrids with their non-transgenic counterparts and commercial varieties for resistance to European corn borer and for agronomic traits. Plant Breeding, 120(5), 397–403. http://doi.org/10.1046/j.1439-0523.2001.00621.x
maize	118	Magg_2011	917	zea_mays	NX6369Bt	hybrid	domGE	cry	2	controlled	NA	NA	NA	NA	NA	NA	NA	NA	NA	221	cm	NA	NA	Magg, T., Melchinger, A. E., Klein, D., & Bohn, M. (2001). Comparison of Bt maize hybrids with their non-transgenic counterparts and commercial varieties for resistance to European corn borer and for agronomic traits. Plant Breeding, 120(5), 397–403. http://doi.org/10.1046/j.1439-0523.2001.00621.x
maize	118	Magg_2011	918	zea_mays	PactolBt	hybrid	domGE	cry	2	controlled	NA	NA	NA	NA	NA	NA	NA	NA	NA	202	cm	NA	NA	Magg, T., Melchinger, A. E., Klein, D., & Bohn, M. (2001). Comparison of Bt maize hybrids with their non-transgenic counterparts and commercial varieties for resistance to European corn borer and for agronomic traits. Plant Breeding, 120(5), 397–403. http://doi.org/10.1046/j.1439-0523.2001.00621.x
maize	118	Magg_2011	919	zea_mays	Cesar	hybrid	domNGE	NA	NA	controlled	NA	NA	NA	NA	NA	NA	NA	NA	NA	206	cm	NA	NA	Magg, T., Melchinger, A. E., Klein, D., & Bohn, M. (2001). Comparison of Bt maize hybrids with their non-transgenic counterparts and commercial varieties for resistance to European corn borer and for agronomic traits. Plant Breeding, 120(5), 397–403. http://doi.org/10.1046/j.1439-0523.2001.00621.x
maize	118	Magg_2011	920	zea_mays	NX6369	hybrid	domNGE	NA	NA	controlled	NA	NA	NA	NA	NA	NA	NA	NA	NA	226	cm	NA	NA	Magg, T., Melchinger, A. E., Klein, D., & Bohn, M. (2001). Comparison of Bt maize hybrids with their non-transgenic counterparts and commercial varieties for resistance to European corn borer and for agronomic traits. Plant Breeding, 120(5), 397–403. http://doi.org/10.1046/j.1439-0523.2001.00621.x
maize	118	Magg_2011	921	zea_mays	Pactol	hybrid	domNGE	NA	NA	controlled	NA	NA	NA	NA	NA	NA	NA	NA	NA	205	cm	NA	NA	Magg, T., Melchinger, A. E., Klein, D., & Bohn, M. (2001). Comparison of Bt maize hybrids with their non-transgenic counterparts and commercial varieties for resistance to European corn borer and for agronomic traits. Plant Breeding, 120(5), 397–403. http://doi.org/10.1046/j.1439-0523.2001.00621.x
maize	118	Magg_2011	922	zea_mays	Favola	commercial_line	domNGE	NA	NA	controlled	NA	NA	NA	NA	NA	NA	NA	NA	NA	198	cm	NA	NA	Magg, T., Melchinger, A. E., Klein, D., & Bohn, M. (2001). Comparison of Bt maize hybrids with their non-transgenic counterparts and commercial varieties for resistance to European corn borer and for agronomic traits. Plant Breeding, 120(5), 397–403. http://doi.org/10.1046/j.1439-0523.2001.00621.x
maize	118	Magg_2011	923	zea_mays	Helix	commercial_line	domNGE	NA	NA	controlled	NA	NA	NA	NA	NA	NA	NA	NA	NA	208	cm	NA	NA	Magg, T., Melchinger, A. E., Klein, D., & Bohn, M. (2001). Comparison of Bt maize hybrids with their non-transgenic counterparts and commercial varieties for resistance to European corn borer and for agronomic traits. Plant Breeding, 120(5), 397–403. http://doi.org/10.1046/j.1439-0523.2001.00621.x
maize	118	Magg_2011	924	zea_mays	Symphony	commercial_line	domNGE	NA	NA	controlled	NA	NA	NA	NA	NA	NA	NA	NA	NA	196	cm	NA	NA	Magg, T., Melchinger, A. E., Klein, D., & Bohn, M. (2001). Comparison of Bt maize hybrids with their non-transgenic counterparts and commercial varieties for resistance to European corn borer and for agronomic traits. Plant Breeding, 120(5), 397–403. http://doi.org/10.1046/j.1439-0523.2001.00621.x
maize	118	Magg_2011	925	zea_mays	MesnilBt	hybrid	domGE	cry	2	controlled	NA	NA	NA	NA	NA	NA	NA	NA	NA	235	cm	NA	NA	Magg, T., Melchinger, A. E., Klein, D., & Bohn, M. (2001). Comparison of Bt maize hybrids with their non-transgenic counterparts and commercial varieties for resistance to European corn borer and for agronomic traits. Plant Breeding, 120(5), 397–403. http://doi.org/10.1046/j.1439-0523.2001.00621.x
maize	118	Magg_2011	926	zea_mays	NovelisBt	hybrid	domGE	cry	2	controlled	NA	NA	NA	NA	NA	NA	NA	NA	NA	222	cm	NA	NA	Magg, T., Melchinger, A. E., Klein, D., & Bohn, M. (2001). Comparison of Bt maize hybrids with their non-transgenic counterparts and commercial varieties for resistance to European corn borer and for agronomic traits. Plant Breeding, 120(5), 397–403. http://doi.org/10.1046/j.1439-0523.2001.00621.x
maize	118	Magg_2011	927	zea_mays	PactolBt	hybrid	domGE	cry	2	controlled	NA	NA	NA	NA	NA	NA	NA	NA	NA	225	cm	NA	NA	Magg, T., Melchinger, A. E., Klein, D., & Bohn, M. (2001). Comparison of Bt maize hybrids with their non-transgenic counterparts and commercial varieties for resistance to European corn borer and for agronomic traits. Plant Breeding, 120(5), 397–403. http://doi.org/10.1046/j.1439-0523.2001.00621.x
maize	118	Magg_2011	928	zea_mays	ValmontBt	hybrid	domGE	cry	2	controlled	NA	NA	NA	NA	NA	NA	NA	NA	NA	234	cm	NA	NA	Magg, T., Melchinger, A. E., Klein, D., & Bohn, M. (2001). Comparison of Bt maize hybrids with their non-transgenic counterparts and commercial varieties for resistance to European corn borer and for agronomic traits. Plant Breeding, 120(5), 397–403. http://doi.org/10.1046/j.1439-0523.2001.00621.x
maize	118	Magg_2011	929	zea_mays	TransalBt	hybrid	domGE	cry	2	controlled	NA	NA	NA	NA	NA	NA	NA	NA	NA	236	cm	NA	NA	Magg, T., Melchinger, A. E., Klein, D., & Bohn, M. (2001). Comparison of Bt maize hybrids with their non-transgenic counterparts and commercial varieties for resistance to European corn borer and for agronomic traits. Plant Breeding, 120(5), 397–403. http://doi.org/10.1046/j.1439-0523.2001.00621.x
maize	118	Magg_2011	930	zea_mays	Mesnil	hybrid	domNGE	NA	NA	controlled	NA	NA	NA	NA	NA	NA	NA	NA	NA	221	cm	NA	NA	Magg, T., Melchinger, A. E., Klein, D., & Bohn, M. (2001). Comparison of Bt maize hybrids with their non-transgenic counterparts and commercial varieties for resistance to European corn borer and for agronomic traits. Plant Breeding, 120(5), 397–403. http://doi.org/10.1046/j.1439-0523.2001.00621.x
maize	118	Magg_2011	931	zea_mays	Nobilis	hybrid	domNGE	NA	NA	controlled	NA	NA	NA	NA	NA	NA	NA	NA	NA	203	cm	NA	NA	Magg, T., Melchinger, A. E., Klein, D., & Bohn, M. (2001). Comparison of Bt maize hybrids with their non-transgenic counterparts and commercial varieties for resistance to European corn borer and for agronomic traits. Plant Breeding, 120(5), 397–403. http://doi.org/10.1046/j.1439-0523.2001.00621.x
maize	118	Magg_2011	932	zea_mays	Pactol	hybrid	domNGE	NA	NA	controlled	NA	NA	NA	NA	NA	NA	NA	NA	NA	225	cm	NA	NA	Magg, T., Melchinger, A. E., Klein, D., & Bohn, M. (2001). Comparison of Bt maize hybrids with their non-transgenic counterparts and commercial varieties for resistance to European corn borer and for agronomic traits. Plant Breeding, 120(5), 397–403. http://doi.org/10.1046/j.1439-0523.2001.00621.x
maize	118	Magg_2011	933	zea_mays	Prelude	hybrid	domNGE	NA	NA	controlled	NA	NA	NA	NA	NA	NA	NA	NA	NA	228	cm	NA	NA	Magg, T., Melchinger, A. E., Klein, D., & Bohn, M. (2001). Comparison of Bt maize hybrids with their non-transgenic counterparts and commercial varieties for resistance to European corn borer and for agronomic traits. Plant Breeding, 120(5), 397–403. http://doi.org/10.1046/j.1439-0523.2001.00621.x
maize	118	Magg_2011	934	zea_mays	Transal	hybrid	domNGE	NA	NA	controlled	NA	NA	NA	NA	NA	NA	NA	NA	NA	242	cm	NA	NA	Magg, T., Melchinger, A. E., Klein, D., & Bohn, M. (2001). Comparison of Bt maize hybrids with their non-transgenic counterparts and commercial varieties for resistance to European corn borer and for agronomic traits. Plant Breeding, 120(5), 397–403. http://doi.org/10.1046/j.1439-0523.2001.00621.x
maize	118	Magg_2011	935	zea_mays	Attribut	commercial_line	domNGE	NA	NA	controlled	NA	NA	NA	NA	NA	NA	NA	NA	NA	244	cm	NA	NA	Magg, T., Melchinger, A. E., Klein, D., & Bohn, M. (2001). Comparison of Bt maize hybrids with their non-transgenic counterparts and commercial varieties for resistance to European corn borer and for agronomic traits. Plant Breeding, 120(5), 397–403. http://doi.org/10.1046/j.1439-0523.2001.00621.x
maize	118	Magg_2011	936	zea_mays	Baltimore	commercial_line	domNGE	NA	NA	controlled	NA	NA	NA	NA	NA	NA	NA	NA	NA	244	cm	NA	NA	Magg, T., Melchinger, A. E., Klein, D., & Bohn, M. (2001). Comparison of Bt maize hybrids with their non-transgenic counterparts and commercial varieties for resistance to European corn borer and for agronomic traits. Plant Breeding, 120(5), 397–403. http://doi.org/10.1046/j.1439-0523.2001.00621.x
maize	118	Magg_2011	937	zea_mays	Benicia	commercial_line	domNGE	NA	NA	controlled	NA	NA	NA	NA	NA	NA	NA	NA	NA	264	cm	NA	NA	Magg, T., Melchinger, A. E., Klein, D., & Bohn, M. (2001). Comparison of Bt maize hybrids with their non-transgenic counterparts and commercial varieties for resistance to European corn borer and for agronomic traits. Plant Breeding, 120(5), 397–403. http://doi.org/10.1046/j.1439-0523.2001.00621.x
maize	118	Magg_2011	938	zea_mays	Clarica	commercial_line	domNGE	NA	NA	controlled	NA	NA	NA	NA	NA	NA	NA	NA	NA	248	cm	NA	NA	Magg, T., Melchinger, A. E., Klein, D., & Bohn, M. (2001). Comparison of Bt maize hybrids with their non-transgenic counterparts and commercial varieties for resistance to European corn borer and for agronomic traits. Plant Breeding, 120(5), 397–403. http://doi.org/10.1046/j.1439-0523.2001.00621.x
maize	118	Magg_2011	939	zea_mays	Lob	commercial_line	domNGE	NA	NA	controlled	NA	NA	NA	NA	NA	NA	NA	NA	NA	255	cm	NA	NA	Magg, T., Melchinger, A. E., Klein, D., & Bohn, M. (2001). Comparison of Bt maize hybrids with their non-transgenic counterparts and commercial varieties for resistance to European corn borer and for agronomic traits. Plant Breeding, 120(5), 397–403. http://doi.org/10.1046/j.1439-0523.2001.00621.x
maize	118	Magg_2011	940	zea_mays	Prinz	commercial_line	domNGE	NA	NA	controlled	NA	NA	NA	NA	NA	NA	NA	NA	NA	227	cm	NA	NA	Magg, T., Melchinger, A. E., Klein, D., & Bohn, M. (2001). Comparison of Bt maize hybrids with their non-transgenic counterparts and commercial varieties for resistance to European corn borer and for agronomic traits. Plant Breeding, 120(5), 397–403. http://doi.org/10.1046/j.1439-0523.2001.00621.x
maize	118	Magg_2011	941	zea_mays	Symphony	commercial_line	domNGE	NA	NA	controlled	NA	NA	NA	NA	NA	NA	NA	NA	NA	222	cm	NA	NA	Magg, T., Melchinger, A. E., Klein, D., & Bohn, M. (2001). Comparison of Bt maize hybrids with their non-transgenic counterparts and commercial varieties for resistance to European corn borer and for agronomic traits. Plant Breeding, 120(5), 397–403. http://doi.org/10.1046/j.1439-0523.2001.00621.x
maize	119	Diniz_2011	942	zea_mays	AG8060	commercial_line	domNGE	NA	NA	controlled	NA	NA	NA	NA	NA	NA	92.7	NA	NA	231	cm	NA	NA	Diniz, R. P. (2011). Adaptabilidade e estabilidade de híbridos de milho trasngênicos e respectivos isogênicos não trasngênicos. Universidade Federal de Lavras.
maize	119	Diniz_2011	943	zea_mays	AG8088	commercial_line	domNGE	NA	NA	controlled	NA	NA	NA	NA	NA	NA	93.2	NA	NA	231	cm	NA	NA	Diniz, R. P. (2011). Adaptabilidade e estabilidade de híbridos de milho trasngênicos e respectivos isogênicos não trasngênicos. Universidade Federal de Lavras.
maize	119	Diniz_2011	944	zea_mays	DKB185	commercial_line	domNGE	NA	NA	controlled	NA	NA	NA	NA	NA	NA	92.2	NA	NA	228	cm	NA	NA	Diniz, R. P. (2011). Adaptabilidade e estabilidade de híbridos de milho trasngênicos e respectivos isogênicos não trasngênicos. Universidade Federal de Lavras.
maize	119	Diniz_2011	945	zea_mays	Impacto	commercial_line	domNGE	NA	NA	controlled	NA	NA	NA	NA	NA	NA	94.1	NA	NA	231	cm	NA	NA	Diniz, R. P. (2011). Adaptabilidade e estabilidade de híbridos de milho trasngênicos e respectivos isogênicos não trasngênicos. Universidade Federal de Lavras.
maize	119	Diniz_2011	946	zea_mays	Maximus	commercial_line	domNGE	NA	NA	controlled	NA	NA	NA	NA	NA	NA	90.4	NA	NA	231	cm	NA	NA	Diniz, R. P. (2011). Adaptabilidade e estabilidade de híbridos de milho trasngênicos e respectivos isogênicos não trasngênicos. Universidade Federal de Lavras.
maize	119	Diniz_2011	947	zea_mays	B30F53	commercial_line	domNGE	NA	NA	controlled	NA	NA	NA	NA	NA	NA	90.4	NA	NA	226	cm	NA	NA	Diniz, R. P. (2011). Adaptabilidade e estabilidade de híbridos de milho trasngênicos e respectivos isogênicos não trasngênicos. Universidade Federal de Lavras.
maize	119	Diniz_2011	948	zea_mays	AG8060	commercial_line	domGE	cry	NA	controlled	NA	NA	NA	NA	NA	NA	94.2	NA	NA	232	cm	NA	NA	Diniz, R. P. (2011). Adaptabilidade e estabilidade de híbridos de milho trasngênicos e respectivos isogênicos não trasngênicos. Universidade Federal de Lavras.
maize	119	Diniz_2011	949	zea_mays	AG8088	commercial_line	domGE	cry	NA	controlled	NA	NA	NA	NA	NA	NA	89.9	NA	NA	236	cm	NA	NA	Diniz, R. P. (2011). Adaptabilidade e estabilidade de híbridos de milho trasngênicos e respectivos isogênicos não trasngênicos. Universidade Federal de Lavras.
maize	119	Diniz_2011	950	zea_mays	DKB185	commercial_line	domGE	cry	NA	controlled	NA	NA	NA	NA	NA	NA	96.1	NA	NA	240	cm	NA	NA	Diniz, R. P. (2011). Adaptabilidade e estabilidade de híbridos de milho trasngênicos e respectivos isogênicos não trasngênicos. Universidade Federal de Lavras.
maize	119	Diniz_2011	951	zea_mays	Impacto	commercial_line	domGE	cry	NA	controlled	NA	NA	NA	NA	NA	NA	93.2	NA	NA	230	cm	NA	NA	Diniz, R. P. (2011). Adaptabilidade e estabilidade de híbridos de milho trasngênicos e respectivos isogênicos não trasngênicos. Universidade Federal de Lavras.
maize	119	Diniz_2011	952	zea_mays	Maximus	commercial_line	domGE	cry	NA	controlled	NA	NA	NA	NA	NA	NA	88.4	NA	NA	232	cm	NA	NA	Diniz, R. P. (2011). Adaptabilidade e estabilidade de híbridos de milho trasngênicos e respectivos isogênicos não trasngênicos. Universidade Federal de Lavras.
maize	119	Diniz_2011	953	zea_mays	B30F53	commercial_line	domGE	cry	NA	controlled	NA	NA	NA	NA	NA	NA	90.8	NA	NA	236	cm	NA	NA	Diniz, R. P. (2011). Adaptabilidade e estabilidade de híbridos de milho trasngênicos e respectivos isogênicos não trasngênicos. Universidade Federal de Lavras.
maize	120	Prado_2016	954	zea_mays	P30K73_VTPRO	commercial_line	domGE	cry1ab	2	controlled	NA	NA	NA	NA	NA	NA	65	NA	NA	161.6	cm	NA	NA	Prado, W. S., Estevão, W. L., Kenji, A., Maeda, M., Carlesso, A., Gonçalves, M. C., … Davide, C. (2016). Agronomic performance of transgenic and isogenic corn hybrids in the state of Mato Grosso do Sul 1. Rev. Ceres Vicosa, 63(6), 796–806.
maize	120	Prado_2016	955	zea_mays	P30K73_YG	commercial_line	domGE	cry1ab	2	controlled	NA	NA	NA	NA	NA	NA	64.6	NA	NA	157	cm	NA	NA	Prado, W. S., Estevão, W. L., Kenji, A., Maeda, M., Carlesso, A., Gonçalves, M. C., … Davide, C. (2016). Agronomic performance of transgenic and isogenic corn hybrids in the state of Mato Grosso do Sul 1. Rev. Ceres Vicosa, 63(6), 796–806.
maize	120	Prado_2016	956	zea_mays	DKB390	commercial_line	domNGE	NA	NA	controlled	NA	NA	NA	NA	NA	NA	64	NA	NA	154.3	cm	NA	NA	Prado, W. S., Estevão, W. L., Kenji, A., Maeda, M., Carlesso, A., Gonçalves, M. C., … Davide, C. (2016). Agronomic performance of transgenic and isogenic corn hybrids in the state of Mato Grosso do Sul 1. Rev. Ceres Vicosa, 63(6), 796–806.
maize	120	Prado_2016	957	zea_mays	P30K73	commercial_line	domNGE	NA	NA	controlled	NA	NA	NA	NA	NA	NA	65.6	NA	NA	46.3	cm	NA	NA	Prado, W. S., Estevão, W. L., Kenji, A., Maeda, M., Carlesso, A., Gonçalves, M. C., … Davide, C. (2016). Agronomic performance of transgenic and isogenic corn hybrids in the state of Mato Grosso do Sul 1. Rev. Ceres Vicosa, 63(6), 796–806.
maize	120	Prado_2016	958	zea_mays	AG7000_VTPRO	commercial_line	domGE	cry1ab	2	controlled	NA	NA	NA	NA	NA	NA	66.3	NA	NA	145.6	cm	NA	NA	Prado, W. S., Estevão, W. L., Kenji, A., Maeda, M., Carlesso, A., Gonçalves, M. C., … Davide, C. (2016). Agronomic performance of transgenic and isogenic corn hybrids in the state of Mato Grosso do Sul 1. Rev. Ceres Vicosa, 63(6), 796–806.
maize	120	Prado_2016	959	zea_mays	DKB390_YG	commercial_line	domGE	cry1ab	2	controlled	NA	NA	NA	NA	NA	NA	64	NA	NA	143.6	cm	NA	NA	Prado, W. S., Estevão, W. L., Kenji, A., Maeda, M., Carlesso, A., Gonçalves, M. C., … Davide, C. (2016). Agronomic performance of transgenic and isogenic corn hybrids in the state of Mato Grosso do Sul 1. Rev. Ceres Vicosa, 63(6), 796–806.
maize	120	Prado_2016	960	zea_mays	DKB390_VTPRO	commercial_line	domGE	cry1ab	2	controlled	NA	NA	NA	NA	NA	NA	61.6	NA	NA	139.3	cm	NA	NA	Prado, W. S., Estevão, W. L., Kenji, A., Maeda, M., Carlesso, A., Gonçalves, M. C., … Davide, C. (2016). Agronomic performance of transgenic and isogenic corn hybrids in the state of Mato Grosso do Sul 1. Rev. Ceres Vicosa, 63(6), 796–806.
maize	120	Prado_2016	961	zea_mays	AG7000_YG	commercial_line	domGE	cry1ab	2	controlled	NA	NA	NA	NA	NA	NA	64	NA	NA	125.3	cm	NA	NA	Prado, W. S., Estevão, W. L., Kenji, A., Maeda, M., Carlesso, A., Gonçalves, M. C., … Davide, C. (2016). Agronomic performance of transgenic and isogenic corn hybrids in the state of Mato Grosso do Sul 1. Rev. Ceres Vicosa, 63(6), 796–806.
maize	120	Prado_2016	962	zea_mays	AG7000	commercial_line	domNGE	NA	NA	controlled	NA	NA	NA	NA	NA	NA	65.6	NA	NA	135	cm	NA	NA	Prado, W. S., Estevão, W. L., Kenji, A., Maeda, M., Carlesso, A., Gonçalves, M. C., … Davide, C. (2016). Agronomic performance of transgenic and isogenic corn hybrids in the state of Mato Grosso do Sul 1. Rev. Ceres Vicosa, 63(6), 796–806.
maize	120	Prado_2016	963	zea_mays	P30K73_VTPRO	commercial_line	domGE	cry1ab	2	controlled	NA	NA	NA	NA	NA	NA	64	NA	NA	169.3	cm	NA	NA	Prado, W. S., Estevão, W. L., Kenji, A., Maeda, M., Carlesso, A., Gonçalves, M. C., … Davide, C. (2016). Agronomic performance of transgenic and isogenic corn hybrids in the state of Mato Grosso do Sul 1. Rev. Ceres Vicosa, 63(6), 796–806.
maize	120	Prado_2016	964	zea_mays	P30K73_YG	commercial_line	domGE	cry1ab	2	controlled	NA	NA	NA	NA	NA	NA	64	NA	NA	163.8	cm	NA	NA	Prado, W. S., Estevão, W. L., Kenji, A., Maeda, M., Carlesso, A., Gonçalves, M. C., … Davide, C. (2016). Agronomic performance of transgenic and isogenic corn hybrids in the state of Mato Grosso do Sul 1. Rev. Ceres Vicosa, 63(6), 796–806.
maize	120	Prado_2016	965	zea_mays	P30K73	commercial_line	domNGE	NA	NA	controlled	NA	NA	NA	NA	NA	NA	64	NA	NA	158.5	cm	NA	NA	Prado, W. S., Estevão, W. L., Kenji, A., Maeda, M., Carlesso, A., Gonçalves, M. C., … Davide, C. (2016). Agronomic performance of transgenic and isogenic corn hybrids in the state of Mato Grosso do Sul 1. Rev. Ceres Vicosa, 63(6), 796–806.
maize	120	Prado_2016	966	zea_mays	DKB390	commercial_line	domNGE	NA	NA	controlled	NA	NA	NA	NA	NA	NA	64.3	NA	NA	154.6	cm	NA	NA	Prado, W. S., Estevão, W. L., Kenji, A., Maeda, M., Carlesso, A., Gonçalves, M. C., … Davide, C. (2016). Agronomic performance of transgenic and isogenic corn hybrids in the state of Mato Grosso do Sul 1. Rev. Ceres Vicosa, 63(6), 796–806.
maize	120	Prado_2016	967	zea_mays	DKB390_YG	commercial_line	domGE	cry1ab	2	controlled	NA	NA	NA	NA	NA	NA	63.6	NA	NA	149.8	cm	NA	NA	Prado, W. S., Estevão, W. L., Kenji, A., Maeda, M., Carlesso, A., Gonçalves, M. C., … Davide, C. (2016). Agronomic performance of transgenic and isogenic corn hybrids in the state of Mato Grosso do Sul 1. Rev. Ceres Vicosa, 63(6), 796–806.
maize	120	Prado_2016	968	zea_mays	DKB390_VTPRO	commercial_line	domGE	cry1ab	2	controlled	NA	NA	NA	NA	NA	NA	64	NA	NA	149.6	cm	NA	NA	Prado, W. S., Estevão, W. L., Kenji, A., Maeda, M., Carlesso, A., Gonçalves, M. C., … Davide, C. (2016). Agronomic performance of transgenic and isogenic corn hybrids in the state of Mato Grosso do Sul 1. Rev. Ceres Vicosa, 63(6), 796–806.
maize	120	Prado_2016	969	zea_mays	AG7000_VTPRO	commercial_line	domGE	cry1ab	2	controlled	NA	NA	NA	NA	NA	NA	63.3	NA	NA	148.6	cm	NA	NA	Prado, W. S., Estevão, W. L., Kenji, A., Maeda, M., Carlesso, A., Gonçalves, M. C., … Davide, C. (2016). Agronomic performance of transgenic and isogenic corn hybrids in the state of Mato Grosso do Sul 1. Rev. Ceres Vicosa, 63(6), 796–806.
maize	120	Prado_2016	970	zea_mays	AG7000	commercial_line	domNGE	NA	NA	controlled	NA	NA	NA	NA	NA	NA	62.6	NA	NA	140.3	cm	NA	NA	Prado, W. S., Estevão, W. L., Kenji, A., Maeda, M., Carlesso, A., Gonçalves, M. C., … Davide, C. (2016). Agronomic performance of transgenic and isogenic corn hybrids in the state of Mato Grosso do Sul 1. Rev. Ceres Vicosa, 63(6), 796–806.
maize	120	Prado_2016	971	zea_mays	AG7000_YG	commercial_line	domGE	cry1ab	2	controlled	NA	NA	NA	NA	NA	NA	65	NA	NA	130.3	cm	NA	NA	Prado, W. S., Estevão, W. L., Kenji, A., Maeda, M., Carlesso, A., Gonçalves, M. C., … Davide, C. (2016). Agronomic performance of transgenic and isogenic corn hybrids in the state of Mato Grosso do Sul 1. Rev. Ceres Vicosa, 63(6), 796–806.
maize	120	Prado_2016	972	zea_mays	P30K73	commercial_line	domNGE	NA	NA	controlled	NA	NA	NA	NA	NA	NA	62	NA	NA	194	cm	NA	NA	Prado, W. S., Estevão, W. L., Kenji, A., Maeda, M., Carlesso, A., Gonçalves, M. C., … Davide, C. (2016). Agronomic performance of transgenic and isogenic corn hybrids in the state of Mato Grosso do Sul 1. Rev. Ceres Vicosa, 63(6), 796–806.
maize	120	Prado_2016	973	zea_mays	P30K73_VTPRO	commercial_line	domGE	cry1ab	2	controlled	NA	NA	NA	NA	NA	NA	63	NA	NA	189.6	cm	NA	NA	Prado, W. S., Estevão, W. L., Kenji, A., Maeda, M., Carlesso, A., Gonçalves, M. C., … Davide, C. (2016). Agronomic performance of transgenic and isogenic corn hybrids in the state of Mato Grosso do Sul 1. Rev. Ceres Vicosa, 63(6), 796–806.
maize	120	Prado_2016	974	zea_mays	P30K73_YG	commercial_line	domGE	cry1ab	2	controlled	NA	NA	NA	NA	NA	NA	62.3	NA	NA	189.6	cm	NA	NA	Prado, W. S., Estevão, W. L., Kenji, A., Maeda, M., Carlesso, A., Gonçalves, M. C., … Davide, C. (2016). Agronomic performance of transgenic and isogenic corn hybrids in the state of Mato Grosso do Sul 1. Rev. Ceres Vicosa, 63(6), 796–806.
maize	120	Prado_2016	975	zea_mays	DKB390_VTPRO	commercial_line	domGE	cry1ab	2	controlled	NA	NA	NA	NA	NA	NA	64.6	NA	NA	178.6	cm	NA	NA	Prado, W. S., Estevão, W. L., Kenji, A., Maeda, M., Carlesso, A., Gonçalves, M. C., … Davide, C. (2016). Agronomic performance of transgenic and isogenic corn hybrids in the state of Mato Grosso do Sul 1. Rev. Ceres Vicosa, 63(6), 796–806.
maize	120	Prado_2016	976	zea_mays	DKB390_YG	commercial_line	domGE	cry1ab	2	controlled	NA	NA	NA	NA	NA	NA	64.6	NA	NA	177.6	cm	NA	NA	Prado, W. S., Estevão, W. L., Kenji, A., Maeda, M., Carlesso, A., Gonçalves, M. C., … Davide, C. (2016). Agronomic performance of transgenic and isogenic corn hybrids in the state of Mato Grosso do Sul 1. Rev. Ceres Vicosa, 63(6), 796–806.
maize	120	Prado_2016	977	zea_mays	DKB390	commercial_line	domNGE	NA	NA	controlled	NA	NA	NA	NA	NA	NA	66	NA	NA	173.1	cm	NA	NA	Prado, W. S., Estevão, W. L., Kenji, A., Maeda, M., Carlesso, A., Gonçalves, M. C., … Davide, C. (2016). Agronomic performance of transgenic and isogenic corn hybrids in the state of Mato Grosso do Sul 1. Rev. Ceres Vicosa, 63(6), 796–806.
maize	120	Prado_2016	978	zea_mays	AG7000_VTPRO	commercial_line	domGE	cry1ab	2	controlled	NA	NA	NA	NA	NA	NA	65.6	NA	NA	166.6	cm	NA	NA	Prado, W. S., Estevão, W. L., Kenji, A., Maeda, M., Carlesso, A., Gonçalves, M. C., … Davide, C. (2016). Agronomic performance of transgenic and isogenic corn hybrids in the state of Mato Grosso do Sul 1. Rev. Ceres Vicosa, 63(6), 796–806.
maize	120	Prado_2016	979	zea_mays	AG7000_YG	commercial_line	domGE	cry1ab	2	controlled	NA	NA	NA	NA	NA	NA	64.6	NA	NA	161.6	cm	NA	NA	Prado, W. S., Estevão, W. L., Kenji, A., Maeda, M., Carlesso, A., Gonçalves, M. C., … Davide, C. (2016). Agronomic performance of transgenic and isogenic corn hybrids in the state of Mato Grosso do Sul 1. Rev. Ceres Vicosa, 63(6), 796–806.
maize	120	Prado_2016	980	zea_mays	AG7000	commercial_line	domNGE	NA	NA	controlled	NA	NA	NA	NA	NA	NA	64.6	NA	NA	157.3	cm	NA	NA	Prado, W. S., Estevão, W. L., Kenji, A., Maeda, M., Carlesso, A., Gonçalves, M. C., … Davide, C. (2016). Agronomic performance of transgenic and isogenic corn hybrids in the state of Mato Grosso do Sul 1. Rev. Ceres Vicosa, 63(6), 796–806.
maize	120	Prado_2016	981	zea_mays	AG7000_VTPRO	commercial_line	domGE	cry1ab	2	controlled	NA	NA	NA	NA	NA	NA	70.3	NA	NA	140.3	cm	NA	NA	Prado, W. S., Estevão, W. L., Kenji, A., Maeda, M., Carlesso, A., Gonçalves, M. C., … Davide, C. (2016). Agronomic performance of transgenic and isogenic corn hybrids in the state of Mato Grosso do Sul 1. Rev. Ceres Vicosa, 63(6), 796–806.
maize	120	Prado_2016	982	zea_mays	AG7000_YG	commercial_line	domGE	cry1ab	2	controlled	NA	NA	NA	NA	NA	NA	70	NA	NA	138	cm	NA	NA	Prado, W. S., Estevão, W. L., Kenji, A., Maeda, M., Carlesso, A., Gonçalves, M. C., … Davide, C. (2016). Agronomic performance of transgenic and isogenic corn hybrids in the state of Mato Grosso do Sul 1. Rev. Ceres Vicosa, 63(6), 796–806.
maize	120	Prado_2016	983	zea_mays	DKB390_YG	commercial_line	domGE	cry1ab	2	controlled	NA	NA	NA	NA	NA	NA	70.3	NA	NA	135.1	cm	NA	NA	Prado, W. S., Estevão, W. L., Kenji, A., Maeda, M., Carlesso, A., Gonçalves, M. C., … Davide, C. (2016). Agronomic performance of transgenic and isogenic corn hybrids in the state of Mato Grosso do Sul 1. Rev. Ceres Vicosa, 63(6), 796–806.
maize	120	Prado_2016	984	zea_mays	DKB390_VTPRO	commercial_line	domGE	cry1ab	2	controlled	NA	NA	NA	NA	NA	NA	71	NA	NA	135	cm	NA	NA	Prado, W. S., Estevão, W. L., Kenji, A., Maeda, M., Carlesso, A., Gonçalves, M. C., … Davide, C. (2016). Agronomic performance of transgenic and isogenic corn hybrids in the state of Mato Grosso do Sul 1. Rev. Ceres Vicosa, 63(6), 796–806.
maize	120	Prado_2016	985	zea_mays	P30K73_YG	commercial_line	domGE	cry1ab	2	controlled	NA	NA	NA	NA	NA	NA	70.6	NA	NA	134	cm	NA	NA	Prado, W. S., Estevão, W. L., Kenji, A., Maeda, M., Carlesso, A., Gonçalves, M. C., … Davide, C. (2016). Agronomic performance of transgenic and isogenic corn hybrids in the state of Mato Grosso do Sul 1. Rev. Ceres Vicosa, 63(6), 796–806.
maize	120	Prado_2016	986	zea_mays	P30K73_VTPRO	commercial_line	domGE	cry1ab	2	controlled	NA	NA	NA	NA	NA	NA	69.6	NA	NA	123.1	cm	NA	NA	Prado, W. S., Estevão, W. L., Kenji, A., Maeda, M., Carlesso, A., Gonçalves, M. C., … Davide, C. (2016). Agronomic performance of transgenic and isogenic corn hybrids in the state of Mato Grosso do Sul 1. Rev. Ceres Vicosa, 63(6), 796–806.
maize	120	Prado_2016	987	zea_mays	AG7000	commercial_line	domNGE	NA	NA	controlled	NA	NA	NA	NA	NA	NA	72.6	NA	NA	123	cm	NA	NA	Prado, W. S., Estevão, W. L., Kenji, A., Maeda, M., Carlesso, A., Gonçalves, M. C., … Davide, C. (2016). Agronomic performance of transgenic and isogenic corn hybrids in the state of Mato Grosso do Sul 1. Rev. Ceres Vicosa, 63(6), 796–806.
maize	120	Prado_2016	988	zea_mays	DKB390	commercial_line	domNGE	NA	NA	controlled	NA	NA	NA	NA	NA	NA	71.3	NA	NA	119.6	cm	NA	NA	Prado, W. S., Estevão, W. L., Kenji, A., Maeda, M., Carlesso, A., Gonçalves, M. C., … Davide, C. (2016). Agronomic performance of transgenic and isogenic corn hybrids in the state of Mato Grosso do Sul 1. Rev. Ceres Vicosa, 63(6), 796–806.
maize	120	Prado_2016	989	zea_mays	P30K73	commercial_line	domNGE	NA	NA	controlled	NA	NA	NA	NA	NA	NA	71.3	NA	NA	107.1	cm	NA	NA	Prado, W. S., Estevão, W. L., Kenji, A., Maeda, M., Carlesso, A., Gonçalves, M. C., … Davide, C. (2016). Agronomic performance of transgenic and isogenic corn hybrids in the state of Mato Grosso do Sul 1. Rev. Ceres Vicosa, 63(6), 796–806.

## Sheet: abbreviations
gmo_group colum				genotype column
Group	Phenotype			wild= wild populations
1	Herbicide tolerance			domGE= domesticated populations with genetic engineering
2	Insect resistance			domNGE= domesticated populations without genetic engineering
3	Disease resistance
4	Drought tolerance
5	Other
